# Supplementary material for: Conservation of Thermospermine Synthase Activity in Vascular and Non-vascular Plants
Source: Front Plant Sci. 2019 Jun 11;10:663. doi: 10.3389/fpls.2019.00663 (PMC6579911; doi:10.3389/fpls.2019.00663)
Supplement: Supplementary file 2 [file Data_Sheet_2.ZIP › File S2.fas]

>26844_Coccomyxa_subellipsoidea_C-169
------------------------------------------------------------------------------------------------------------------------------------------------------------------------------------------------------------------------MSYS---VTQNGVRSE------------------------------------------------------------------------------------------------------WLEEE-----------------IQE-DLRWS--------------ILVKKKLYSGKSDFQSVELVE---SG-PFGKVLLLDGKSQSAEADEFVYHELLVHLALL--LHPN-PR----------------------T-----IFIAGGGEGATAREALRHKS-----VEKVVMVDIDKVVCDFCEEHLEA----NKA------A-FA--D---PRMHLIIND------------------ARAELERY-----------DGTFDVIIGDLAD-P--V-FGG-----P-CYQLYT--QDFYRTVVEPKLA-PDGIFVTQSGPAGVLTCSEVFSPINH--TLNSV-F---------------P-RVVPYL-QHIPSYV--------------DTWG--WNM----ALK----------N---A------------------QLHFP--E-----R--------AE---------DI----D---ALI-------------KQRIN-G---N----LKFLDG-GTVQAVQFLNKVV-RT---ALAEEQH----IFT----LDKPR-----------FIH---GAG-SVTI-V*--------------------------------------------------------------------------------------------------------------------
>ABCD_scaffold_2002707_Niphotrichum_elongatum_78
-----------------------------------------------------------------------------------------------------------------------------------------------------------MVEYNVEEGSNGVHANGT---------------------------------SKTSSIP----------MTAEVEPKKQCL---------------------------------------------------------------------------------------------------WFEEE-----------------LEE-DLRWV--------------FGYSKILHKGVSEFQDIQLVE---SG-PFGKVLILDGKLQSAEADEYVYHESIIHPALL--YHSN-PK----------------------N-----VFIMGGGEGSTAREALRHRS-----VEEVVMCDIDEEVVNFCRKHLTV----NAE------A-FR--S---DRLDLVINC------------------ARAELEKR-----------TEQFDIIIGDLAD-P--V-AGG-----P-CYLLYT--KSFYERILKPRLK-DGGILVTQGGPAGILSHTEVYSSIYN--TLRQT-F---------------K-YVVPYA-AHVPSYA--------------DTWG--WVM----ASD----------Q-PIP---------------------TM--S--------------AE---------ET----D---SRI-------------KQRVD-G---E----LQFLDG-QTLSATIALNKHV-RK---SLAAERH----VYT----EETAR-----------FIH---GHGTAVKN*----------------------------------------------------------------------------------------------------------------------
>ABCD_scaffold_2010050_Niphotrichum_elongatum_77
-----------------------------------------------------------------------------------------------------------------------------------------------------------------MVECNGVHLNGA------------------------------------------SHPAP---TKPVVEEAVCKK------------------------------------------------------------------------------------------------RCLWFEEE-----------------LEE-DLRWV--------------FGVSKILHTGVSEFQDIELVE---SG-PFGKVLILDGKLQSAEADEFVYHESIVHPALL--YHSN-PK----------------------N-----VFIMGGGEGSTAREALSHRS-----VEKVVMCDIDEEVVNFCRKHLTV----NAE------A-FR--S---TRLDLVINC------------------ARAELEKR-----------TEQFDIVIGDLAD-P--V-AGG-----P-CYQLYT--KSFYERILKPRLK-EGGIFVTQGGPAGILTHTEVYSSIFN--TLRQT-F---------------K-YVVPYG-AHVPSYA--------------DTWG--WVM----ASD----------Q-PLP---------------------TI--T--------------VE---------ET----D---SRI-------------KQRVD-G---E----LKFLDG-QTLSAIMSLNKHV-RK---SLAEERH----VYT----EETAR-----------FVH---GYGTALKI*----------------------------------------------------------------------------------------------------------------------
>ABCD_scaffold_2075920_Niphotrichum_elongatum
------------------------------------------------------------------------------------------------------------------------------------------------MAMRRTDDEQAAAEGARNAAELIAQDNAA--------------------------------------------------PLPSTARANLSS----------------------IMPG-------------------------------------------------------------------------WFSEV---------------------SPMWP------G---EAHSLKVEKFLFEGKSDYQDVVVFE---SA-TYGRVLVLDGVIQLTQRDECAYQEMITHLPLC--SIPN-PK----------------------Q-----VLVVGGGDGGVLREVSRHKS-----IEQIDICEIDKLVVDVAKEFFPD----VAV------G-FE--D---PRVNLHIGD------------------GVAFLREV----------PEGTYDAIIVDSSD-P--V---G-----P-AQALFE--RPFYKTLDRA-LR-PGGVICTQA--ESLWLHMPIIKDIVA--ACRHT-F---------------K-GSINYAWTSVPTYP---------S----GVIG--FML----CST---------AG---P----------SVN--------FR--E-----P--------CN---------PI----D---EAV-------------DAKPSSR--RP----LKFYNS-AMHAAAFSLPQFA-RE---ELENLLT----------PPPSS*------------------------------------------------------------------------------------------------------------------------------------------------
>ABIJ_scaffold_2002702modified2002703_shorter_version_and_replaced_N_Selaginella_lepidophylla
----------------------------------------------------------------------------------------------------------------------------------------MADACHAAAVPDAPAKRAREDEGGESMVVENGCGKGA---------------------------------NAAAIIT--HEEMA---PAPGTARANLSR----------------------IMPG-------------------------------------------------------------------------WFSEL---------------------SPMWT------G---EAHSFEVKKVVFEGKSDFQDVVVFD---SV-SYGRVLVLDGVIQLTQRDECAYQEMIAHLPLC--SIQN-PA----------------------K-----VLVVGGGDGGVLREISRHES-----VQQIDICEIDKMVVDVAKEYFPE----LAM------G-FA--N---PRVNLHIAD------------------GVAFVRDA----------APGTYDAIIVDSSD-P--V---G-----P-AQQLFE--RPFFESIVKA-LR-PGGVVCTQA--ESPWLHMHIIKDIVA--ACRQT-F---------------K-GSVNYAWTTVPSYP---------S----GIIG--FML----CST---------EG---P--------Q--VD--------FR--N-----P--------VV--------SPD----K---LEMITISDE-------GGAEK-RVPLP----LKYYNS-DMHRAAFGLPTFA-KR---ELEHLLT----P*----------------------------------------------------------------------------------------------------------------------------------------------------------
>ABIJ_scaffold_2006318_Selaginella_lepidophylla
-------------------------------------------------------------------------------------------------------------------------------------------------------------------------------------------------------------------------------------------------------------------------------------------------------------------------------------------------------------------------------------------------------------------------------------------------------------------------------------------------------------------------------MVIDVAKEFFPG----LAC------G-FD--S---PLVNLHIGD------------------GVAFVRNA----------PPGTYDAILIDSTD-P--D---G-----P-AMELFE--VPFYQTVAKA-LL-PNGVMCALS--ESPWLNIQTVKNHVD--VCRQV-F---------------E-GSVRFAWTTVPTYP---------S----GVIG--LVL----CSK---------EA--ID---------------------FE--K-----P--------VV---------P-----D---KAL-----------GTVRLGKGCLKRP----LKYYNS-AMHRSALCLPEFA-RT---VLTDTDN----IPE----SESSM-----------------ANGLK*-------------------------------------------------------------------------------------------------------------------------
>ABIJ_scaffold_2009492_Selaginella_lepidophylla
------------------------------------------------------------------------------------------------------------------------------------------------------------MGEAHVCDNRKDCTNGA----------------------------------------------------DRSSKNCL-----------------------------------------------------------------------------------------------------WYEEE-----------------IDK-GLKST--------------YSVSRVLHTGISAYQDIALLE---TR-PFGKVLLLDGKMQSAEADEYVYHEALVHPALL--SHPD-PQ----------------------T-----VFIMGGGEGSTAREVLKHKT-----VNKVVMCDIDEEVVNFCRTHLAV----NRE------T-FQ--N---KKLDVIIRD------------------ARMELEVC-----------SGKFDIVIGDLAD-P--M-EGG-----P-CNQLYT--RSFYQNIVKSKLK-DGGIFVTQAGPAGILSHMDVFSSIHD--TLKQV-F---------------K-YVIPYA-THIPSYS--------------DVWG--WVM----ASN---------TQ-------------------------FI--S-----Q--------SA--------AKV----D---SRI-------------NSRLNQS--------LKFLDG-ATYTGICTLNKRQ-RQ---MLEERYY--------ALLKQDI*------------------------------------------------------------------------------------------------------------------------------------------------
>ABIJ_scaffold_2009837_Selaginella_lepidophylla
----------------------------------------------------------------------------------------------------------------------------------------------------------MGEVHVNGKLSSKPNSNGI--------------------------------------------------VAAPVSNNHRGL---------------------------------------------------------------------------------------------------WFEEE-----------------IEE-DLRWV--------------FSVSRVLHTGVSEFQDIALVE---SG-PFGKVLILDGKLQSAEADEFVYHECLVHPALL--YHPN-PR----------------------N-----VFIMGGGEGSTAREALRHKS-----VAKVVMCDIDKEVVDFCRAHLTM----NHE------A-FH--S---SRLDLVIND------------------ARAELEER-----------QDKFDIIIGDLAD-P--V-EGG-----P-CYKLYT--QSFYELVVKPRLN-AGGILVTQGGPAGILTHSEVYSSIFN--TLRQV-F---------------K-YVVPYA-AHIPSYS--------------DSWG--WIM----ASD----------Q---P---------------------FP--QM----T--------VV---------ET----D---SRI-------------KQRL--DQTSE----LRFLDG-ETLSATMALNKHV-RQ---ALAEEKH----VYT----EESAR-----------FVH---GHGAAQQAA*---------------------------------------------------------------------------------------------------------------------
>Acoerulea|Aqcoe2G342900
------------------------------------------------------------------------------------------------------------------------------------------------------MGSNGNGVHGNGVNGHGINGNGN--------------------------------------------------GHLPIEGRRKSC---------------------------------------------------------------------------------------------------WYEEE-----------------IED-NLRWC--------------FALNSILHTGSSQYQDIALLD---TK-PFGKALVIDGKLQSAETDEFIYHECLVHPALL--QHPN-PK----------------------T-----VFIMGGGEGSTAREILRHKT-----VDKVVMCDIDEEVVDFCKSHLDV----NKE------A-FS--S---SRLQLIIND------------------ARAELEKS-----------KECFDVIIGDLAD-P--I-EGG-----P-CYQLYT--KSFYESTVKPRLS-EGGIFVTQAGPAGVFSHTEVFSCINN--TLRQV-F---------------K-YVVPYS-AHIPSYA--------------DTWG--WVM----ASD----------A---P---------------------FT--A-----D--------AE---------EL----D---IRT-------------KQRIK-G---E----NRYLDG-KTFASASTLCKAV-RK---SLAKETQ----VYT----EGTAR-----------FIY---GHGAVHK*-----------------------------------------------------------------------------------------------------------------------
>Acoerulea|Aqcoe3G114600
----------------------------------------------------------------------------------------------------------------------------------------------------MAEQSGVVVSSSSAAALASDLSIKR---------------------------------PREGENG--GIEME---DNSNKEPTCFSS----------------------LIPG-------------------------------------------------------------------------WFSEI---------------------SPMWP------G---EAHSLKVEKILFQGKSEYQNVVVFQ---SS-TYGKVLVLDGVIQVTERDECAYQEMIAHLPLC--SIPN-PK----------------------K-----VLVIGGGDGGVLREVSRHSS-----VEQIDICEIDGMVIDVSKKFFPD----LAV------G-YE--D---PRVSLHIGD------------------GVAFLKAV----------PEGTYDAIIVDSSD-P--I---G-----P-AQELFE--KPFFQSVANA-LR-PGGVVCTQA--ESIWLHMHIIEDIVT--NCRQI-F---------------K-GSVNYAWTTVPTYP---------S----GVIG--FML----CST---------EG---P--------P--VD--------FK--H-----P--------VN---------PI----D---DSG------------SHTYAK-A---P----MKYYNS-EIHSAAFCLPSFA-KK---VIESKAK*---------------------------------------------------------------------------------------------------------------------------------------------------------------
>Acoerulea|Aqcoe3G298500
-------------------------------------------------------------------------------------------------------------------------------------------------------MAEESDVAAFTTVAAKRLREEE--------------------------------------------------EVGNKGNNYIST----------------------VIPG-------------------------------------------------------------------------WFSQI---------------------SLMWP------G---EAHSLKVEKILFQQKSKYQDVMVFQ---SS-TYGKVLILDGVIQVTERDERAYTEMITHLPLC--SIPN-PR----------------------K-----VLVIGGGDGGVLREVSRHSS-----VEEIHICEIDAMVVDVSKQYFPD----LSV------G-FQ--N---PRVTLHIGD------------------GVTYLNAV----------SEGTYDAIIVDSSD-P--I---G-----P-AKELFE--KPFFQSVAKA-LR-PGGVVCTQA--ESIWLHMHLIENIVA--NCRQI-F---------------K-GSINYAWTTVPTYP---------S----GVIG--FML----CST---------EG---P----------SVD--------FK--H-----P--------VN---------PL----D---ENG-------------SHSKAKG---P----LKFYNS-KIHSAAFCLPSFA-KK---VINKDQ*----------------------------------------------------------------------------------------------------------------------------------------------------------------
>Acoerulea|Aqcoe7G012600
-----------------------------------------------------------------------------------------------------------------------------------------------------MEGDAGRDLGCQKIMDGKVTSDKI----------------------------------PMEKKVIPSCCIKAMASAPELDAKCHST----------------------VVSG-------------------------------------------------------------------------WFSEF--------RSSPDGTPRTYYNNPMWP------G---EAHSLQVEKILYKEQSEYQEVLVFE---SF-AYGKVLVLDGIVQLTEKDECAYQEMIAHLPLC--SISS-PK----------------------N-----VLVVGGGDGGVLREIARHSS-----VECIDICEIDKMVIDVSKKFFPD----LAV------G-FE--D---PRVQLHIGD------------------AIEFLRNA----------KEGMYDAIIVDSSD-P--V---G-----P-AQELVE--KPFFEMIARA-LR-PGGVLCNMA--ESMWLHTHLIEDMIS--ICRQT-F---------------K-GSVHYAWTNVPTYP---------S----GVIG--FLI----CST---------AG---P----------PVD--------FL--N-----P--------IN---------PI----E---KVE-------------GSRKSSR---E----LRFYNS-EMHAAAFALPSFL-KR---EVSVLRD-----------SPTSV----GRVYV*--------------------------------------------------------------------------------------------------------------------------------------
>Acoerulea|Aqcoe7G434300
-----------------------------------------------------------------------------------------------------------------------------------------------------------MGEAVEILLSNNGLSNGT------------------------------------------LDNQI---LDEEPQKKCC-----------------------------------------------------------------------------------------------------WYEEE-----------------LDE-DLKWS--------------FALNSTLHRGTSEYQDIVLLD---TK-HFGKALMIDGKMQSAETDEFVYHECLIHPPLI--YHPN-PK----------------------T-----VFIMGGGEGSAAREVLKHKN-----IEKVVMCDIDQEVVDFCRKHLSA----NSE------A-FR--N---ERLDLIIND------------------AKAELEKR-----------EEKYDLIIGDLAD-P--V-EGG-----P-CYQLYT--KSFYEEILKPKLK-DSGIFVTQAGPAGVLTHKEVFSSIYN--TLRNV-F---------------K-YVVAYT-AHVPSFV--------------DTWG--WVM----ASD----------Q---P---------------------FV--L-----E--------PN---------QI----D---NRI-------------EERID-G---E----LLYLNG-TTFLSSTVMNKIV-HQ---GLMNETH----VYT----EDDAR-----------FLR---GYGKAYGA*----------------------------------------------------------------------------------------------------------------------
>AEKF_scaffold_2011704_Penium_margaritaceum
----------------------------------------------------------------------------------------------------------------------------------MLAVAHTPKESAQASHLDLKAKQPGGHCGCAANGNGIANGNGT----------------------------TEDAEKKRHGPMPGSDGTHASGGGGGGGGGGRSG----------------------------------------------------------------------------------------------GRVRMWFEEE-----------------IEQ-DLRWT--------------FGVTDILHTSVSEFQDVELLE---SG-PFGKVLVLDGKLQSAEADEFVYHESLVHPALL--HHPC-PK----------------------R-----VFIMGGGEGSTAREILRHTS-----VTNLDMCDIDQVVVDFCKKHLTV----NAA------T-FA--S---DRLNLIIND------------------AREELRKG-------LGGAGEGYDVIVGDLAD-P--V-DGG-----P-CYQLYT--EEFYLQVLKPRLN-PGGILVTQAGPAGILSATEVYTPIYN--TLRQV-F---------------K-YVLPYA-AHVPSYA--------------DTWG--WIM----ASD----------T---P---------------------FP--E--------------VT-------ATSV----D---KRI-------------DERVE-G---E----LRFLDG-STMVAQLSLNKHV-RR---LLAEETT----VYT----EDSPL-----------FIH---GQGTQTPHAKPADN*----------------------------------------------------------------------------------------------------------------
>AGIO_scaffold_2000269_Haematococcus_pluvialis
-------------------------------------------------------------------------------------------------------------------------------------------------------------------------------------------------------------------------------MASAYAKRL------------------------------------------------------------------------------------------------------WLEED-----------------LGD-DYRWS--------------YRVTRVLFSGKSEFQEIDLVD---TP-TWGKVLLLDGKMQSTEADEQLYHELLVHPAML--HHHH-PR----------------------T-----VFIMGGGEGATAREVLRHSS-----VQQVVMVDIDKVVTDFCARHLLR----NTA------A-FA--D---PRLTLINDD------------------ARSQLESW-----------PGTFDVIIGDLAD-P--L-EGG-----P-CYQLYT--QEFYETVVRRKLA-PGGIFVTQSGPAGLLSAKEVFSTIHR--TVSSV-F---------------P-TVVPYA-QHIPSFC--------------ECWG--FNLAFSHAST----------R---P---------------------LT--------P---------R---------EF----D---EAA-------------AARIS-G---E----LVHVDG-ATFAGTAMLSKTV-RK---ALAEETQ----VYT----TDNLK-----------FIH---GTGVNAACSSPPSSALATSCGTHSCGSPPKAFPVRVSCLDAPASPTASSTVSSASLSACWEGLPGSSRDMEGMSLPNGHGTVNGHVLANGHGNAIEHSMANGHSTVIGPANAQGDGNASVHELSNN*
>Ahypochondriacus|AHYPO_002915
-----------------------------------------------------------------------------------------------------------------------------------------------------MEVGGKEGLECHMAMDGKTSNNGI---------------------------------DKKIPSC-CLKAQA---SAPESDAKCHST----------------------VVSG-------------------------------------------------------------------------WFSQP---------QSSCGESKLYYNNPMWP------G---EAHSLKVEEVLFKERSLYQEVLVFK---SS-SYGNVLALDGIIQLTEKDECAYQEMIAHLPLC--SIPS-PK----------------------K-----VLVVGGGDGGVLREISRHTS-----VEQIDICEIDQMVIDVSKKFFPE----LAL------G-FE--D---PRVKLHVGD------------------AVEFLKNS----------PEGIYDAIIVDSSD-P--V---G-----P-AQELVE--RPFFETLARA-LR-PGGVLCNMA--ESFWLHTHLIENMLS--ICREV-F---------------K-GSVHYAWTSVPTYP---------S----GVIG--FLL----CST---------EGPP-------------VD--------FL--N-----P--------IN---------PI----E---DIE-------------GAAKKYR---E----LKFYNS-EVHTAAFVLPSFV-RREVSLLRDPAS-----------TNGV*------------------------------------------------------------------------------------------------------------------------------------------------
>Ahypochondriacus|AHYPO_005770
--------------------------------------------------------------------------------------------------------------------------------------------------------MGSLSAISNGENNNGCLENSI---------------------------------YSNGLIG--KVQSG---VGGDHQLQRKSC---------------------------------------------------------------------------------------------------WYEEE-----------------IED-NLRWS--------------FALNRILHTGVTQYQDIQLLD---TK-PFGKALVIDGKLQSAEIDEFIYHECLVHPPLL--HHPN-PK----------------------S-----IFIMGGGEGSTAREILRHKT-----VDKVVMCDIDKEVVDFCKSYLVV----NKE------A-FN--D---PRLELIIND------------------ARAELQSR-----------VEKYDVIIGDLAD-P--L-EGG-----P-CYKLYT--KSFYENVVKPKLT-NNGVFVTQAGPAGIFSHTEVFSSIYN--TLKQV-F---------------K-YVVAYS-AHVPSYA--------------DTWG--WVM----GSD-----------------------S-ELM--------LK--S-----E-------------------EF----D---LRM-------------KLRMN-G---E----NRFLDG-TTFLSTSTLCKTV-RK---SLDNETH----VYT----EGCAR-----------FIH---GHG-KLN*-----------------------------------------------------------------------------------------------------------------------
>Ahypochondriacus|AHYPO_006505
--------------------------------------------------------------------------------------------------------------------------------------------------MADEGIVASGIDLPVKRPREEEEEEGK---------------------------------NMSENNGNGVSSVSMETEDSNKLPNSFSS----------------------IIPG-------------------------------------------------------------------------WFSEI---------------------SPMWP------G---EAHSLKVEKVLFQGKSKYQDVIVFQ---SS-TYGKVLVLDGVIQLTERDECAYQEMITHLPLC--SIPN-PK----------------------K-----VLVIGGGDGGVLREVARHSS-----VEHVDICEIDEMVVTVSKEFFPE----VAV------G-YD--D---PRVKLHIGD----------------------------------------------------------G-----P-AKELFE--KPFFESVAKA-LR-PGGVVCTQA--ESIWLHMHIIEDIVS--NCRQI-F---------------K-GSVNYA----------------------GVMG--FML----CST---------EG---P----------EVD--------FK--H-----P--------VN---------PI--------DKI-------------DRGDEKH---P----LKFYNA-ELHSAAFCLPTFA-KK---VIDSKAK*---------------------------------------------------------------------------------------------------------------------------------------------------------------
>Ahypochondriacus|AHYPO_013407
--------------------------------------------------------------------------------------------------------------------------------------------------MAEEGIIASIDLPVKRPREEEEQQEGK--------------------------------NMSEINGNGVSSVSIETENSNKQQPDSFSS----------------------IIPG-------------------------------------------------------------------------WFSEI---------------------SPMWP------G---EANSLKVDKILFQGKSKYQDVLVFQ-------------------LTERDECAYQEMITHLPLC--SISN-PK----------------------K-----VLVIGGGDGGVLREVGRHPS--------------------VSKEFFPE----VAV------G-YT--D---PRVNLHIGD----------------------------------------------------------G-----P-AKELFE--KPFFESVAKA-LR-PGGVVCTQA--ESIWLHMHIIEEIVA--NCRQI-F---------------K-GSVNYAWTTVPTYP---------S----GVMG--FML----CST---------EG---P----------KVD--------FM--H-----P--------VN---------PI----E---KIA-------------DHENEKH---P----LKFYNS-ELHSAAFCLPTFA-KK---VIESKSK---------------*------------------------------------------------------------------------------------------------------------------------------------------------
>AJAU_scaffold_2008352_Helicodictyon_planctonicum
-------------------------------------------------------------------------------------------------------------------------------------------MSAFPYSNSVFSAAPRLRCSLDRSPACSVVPEAL---------------------------------VKRCNFLHHQQVVTRRVRQGKMAAEGETA------------------------------------------------------------------------------------------------RRLWVEED-----------------MSD-DFRVS--------------LQLKAILHRGRSEYQDIELLD---TM-TYGKLLMLDGKLQSTEADEFAYHESLVHPALL--FHPN-PK----------------------T-----VFICGGGEGATAREVLRYKS-----VEKVVMVDIDRVVCEFCKLHLEA----NTA------A-FD--D---PRLELIHDD------------------ARTQLENY-----------DGTFDVIIGDLAD-P--V-FGG-----P-CYQLYT--DDFYKTVVQPKLN-EGGIFITQSGPCGVLSSHEVFTSIHN--TLKST-F---------------P-TVLPYC-CHIPSFV--------------DEWG--WNI----AFK---------SG--LP---------------------VA--D--------------AG---------ELPALLD---VRA-------------AERLGSG--------LRFLDG-GTWTRMSTLTKVV-RD---AIAADTH----IFT----QDNPR-----------FIY---GAGVKTIV*----------------------------------------------------------------------------------------------------------------------
>ALUC_scaffold_2002421_Ipomoea_quamoclit
--------------------------------------------------------------------------------------------------------------------------------------------------MEVIAAHNNGVVTSNHNDTASHHNGTA------------------------------------------NHHNG---AAHENAGNDFGC----------------------IKPG-------------------------------------------------------------------------WFSEF---------------------SQLWP------G---EAFSLKIEKLLFQGKSDYQDVMLFE---SA-KYGKVLTLDGAIQHTENGGFPYTEMIVHLPLG--SIPS-PK----------------------K-----VLIIGGGIGFTLMEVSRYPT-----IEKIDIVEIDEMVVDISRQFFPY----LAT------G-FE--D---PRVTLHMGD------------------GAAFVKAA----------QEGYYDAIIVDSSD-P--I---G-----P-AKDLFE--RPFFEAVAKA-LR-AGGVVCTQA--ESIWLHMHLIKQIIQ--NCRQV-F---------------K-GSVNYAWTTVPTYP---------S----GVIG--YML----CST---------EG---P----------AVD--------FK--N-----P--------VN---------PI----D---KDT-------------THVKSKG---P----LKFYNS-EIHKAAFTLPSFA-QK---LLE--------------------------------------------------------------------------------------------------------------------------------------------------------------------
>ALUC_scaffold_2010275_Ipomoea_quamoclit
---------------------------------------------------------------------------------------------------------------------------------------------------------MGSEGSVDLLHCSNTTFPNK---------------------------------LHCDHPK--LEIIA---APMEVINNDFTDGS-------------------------------------------------------------------------------------------------WFEEE-----------------IDV-DLKWS--------------FALNRMLHRGKSEYQDIALLD---TK-RFGKVLVIDGKMQSAEIDEFIYHECLIHPALL--CHPN-PK----------------------T-----VFIMGGGEGSAAREALRHKS-----IDKVVMCDIDQEVVDFCRRYLTA----NYE------A-FH--N---KKLDLVIND------------------AKAELEQR-----------KEKFDVIVGDLAD-P--V-EGG-----P-CYQLYT--KSFYENVLKPKLT-DNGIFVTQAGPAGVFTHKEVFSSIYY--TIKQV-F---------------K-HVIVFT-AHVPSFA--------------DTWG--WVM----ASD----------E---P---------------------LC--V-----D--------SA---------MI----D---AKI-------------AERID-G---E----LLYLSG-SSFYSSTILNKTV-AT---TLKNETH----VYT----EEDAR-----------FIP---GHG-LLTF-KN*-------------------------------------------------------------------------------------------------------------------
>ALUC_scaffold_2054139_Ipomoea_quamoclit
----------------------------------------------------------------------------------------------------------------------------------------------------MEGDAGRGLECQKIMDGKENNASGP---------------------------------DKDVLPSCCLKARA---CEPEPDAKTHST----------------------VCSG-------------------------------------------------------------------------WFSEP-------RSPSGEDGRMLYFNNPMWP------G---EAHSIKVEEILFKERSEYQEVLVFK---SS-SYGKVLVLDGIVQLTDKDECAYQEMIAHLPLC--SIKS-PK----------------------N-----VLVVGGGDGGVLREISRHNS-----VELIDICEIDKMVIDVSKKFFPE----LAV------G-FE--D---PRVKLHVGD------------------AVEFLRHA----------PEGKYDAIIVDSSD-P--V---G-----P-AQELVE--KPFFETLARA-LR-PGGVLCNMA--ESMWLHTHLIQDIIT--ICRET-F---------------K-GSVHYAWTSVPTYP---------S----GVIG--FVL----CST---------EG---P----------PVD--------FL--N-----P--------IN---------PI--------EKL---------------DGALQYRRE----LRFYNS-EVHRAAFALPSFV-KREVSCLRDVRP-----------ATAVQT*----------------------------------------------------------------------------------------------------------------------------------------------
>ALZF_scaffold_2019640_Halochlorococcum_marinum
-----------------------------------------------------------------------------------------------------------------------------------------------------------------------MSSKRL-----------------------------------------------------------------------------------------------------------------------------------------------------------------WLEED-----------------LQT-DLRWM--------------MSIKSILGAGTSPFQEFELVD---SS-PFGKLLVLDGKVQSADADEFVYHELLVHPAML--NHPN-PK----------------------T-----VFICGGGEGATAREVLRHKS-----VERVVMVDIDKMVCDFCEEHLEA----NKA------A-FA--D---PRLELVYDD------------------ARAQLEAA-----------SGSFDVIIGDLAD-P--V-FGG-----P-CYQLYT--QEFYKTVVAAKLA-PGGVFVTQSGPAGVLSHSQVFTSIHC--TLKSV-F---------------P-RVLPYS-RHIPSFA--------------DMWG--WNL----CFS----------D---P---------------------EQ--T-----A--------LS-------GQEI----D---ERA-------------AERVE-G---E----LTFLDG-GTWTQVSSLDKVT-RR---ALAEERH----IYS----VDNPK-----------FIH---GQGVTTLI*----------------------------------------------------------------------------------------------------------------------
>AQFM_scaffold_2080547_Pseudolarix_amabilis
------------------------------------------------------------------------------------------------------------------------------------------------------------------MRMGEVAVKAS---------------------------------DNFVNGN--GVHEM---SGSNGTVTSAPQ----------------------LGEG--------------------------------------------------------------------RRRCCWYEEE-----------------VDD-DIRLC--------------FALNSILHTGVSHYQDIALLD---TK-PFGKVLVIDGKIQSAEMDEFIYHESLVHPALV--LHSN-PQ----------------------T-----VFIMGGGEGSTAREILKHRS-----VNKVVMCDIDEEVVDFCKKHLVV----NQE------A-FA--S---PRLDLIIND------------------ARAELENR-----------GEYFDVIIGDLAD-P--I-EGG-----P-CYQLYT--KSFYELVVKPKLS-HRGIFVTQAGPAGALSHTEVFSCIYN--TLRHV-F---------------K-FVVPYS-AHVPSFA--------------DTWG--WVM----ASD----------Q---P---------------------FT--S-----N--------SR---------EI----D---SRT-------------KQRIE-G---D----LRYFDG-ETFVAASTLNKSV-RK---TLANETH----VYT----AETAR-----------YIY---GHG-TGHK-LNI*------------------------------------------------------------------------------------------------------------------
>AQFM_scaffold_2081396_Pseudolarix_amabilis
------------------------------------------------------------------------------------------------------------------------------------------------------MAENNNNNNGNNGFDLPIKRIRP---------------------------------QEEEGDH--PPCRV---DAMDGVEGDYPS----------------------VIPG-------------------------------------------------------------------------WFAEI---------------------SAMWP------G---EAHSLKVEKVLFKGKSKYQDVMVFQ---SL-TYGKVLVLDGVIQLTERDECAYQEMITHLPLC--SVPN-PK----------------------K-----VLVIGGGDGGVLREVSRHNS-----VEQIDICEIDGMVIDVSKQYFPD----IAV------G-FD--D---PRVRVNVGD------------------GVAFLRDS----------PEGVYDVVIVDSSD-P--I---G-----P-AEELFK--KPFFELVAKA-LR-PGGVMCTQA--ESIWLHMPIIEDIVS--ACRQT-F---------------K-GSVNYAWTTVPTYP---------S----GVIG--FML----CST---------EG---P--------A---V-D------FQ--R-----P--------TN---------PI----E---KQD-------------SNVDS-QR--P----LKFYNS-EMHTASFCLPAFA-RR---AIGSNVQ-----------PPLS*------------------------------------------------------------------------------------------------------------------------------------------------
>Arabidopsis_thaliana_ACL5
--------------------------------------------------------------------------------------------------------------------------------------------------------MGEAVEVMFGNGFPEIHKATS--------------------------------------------------PTQTLHSNQQDCH--------------------------------------------------------------------------------------------------WYEET-----------------IDD-DLKWS--------------FALNSVLHQGTSEYQDIALLD---TK-RFGKVLVIDGKMQSAERDEFIYHECLIHPALL--FHPN-PK----------------------T-----VFIMGGGEGSAAREILKHTT-----IEKVVMCDIDQEVVDFCRRFLTV----NSD------A-FC--N---KKLELVIKD------------------AKAELEKR-----------EEKFDIIVGDLAD-P--V-EGG-----P-CYQLYT--KSFYQNILKPKLS-PNGIFVTQAGPAGIFTHKEVFTSIYN--TMKQV-F---------------K-YVKAYT-AHVPSFA--------------DTWG--WVM----ASD---------HE-------------------------FD--V-----E--------VD---------EM----D---RRI-------------EERVN-G---E----LMYLNA-PSFVSAATLNKTI-SL---ALEKETE----VYS----EENAR-----------FIH---GHGVAYRHI----------------------------------------------------------------------------------------------------------------------
>Arabidopsis_thaliana_SPDS1
---------------------------------------------------------------------------------------------------------------MIFSVVRSSLPYIFRFTSHQNHHLSQTLVPPLSHFSEIFTRAITMDAKETSATDLKRPREED---------------------------------DNGGAAT--METEN---GDQKKEPACFST----------------------VIPG-------------------------------------------------------------------------WFSEM---------------------SPMWP------G---EAHSLKVEKVLFQGKSDYQDVIVFQ---SA-TYGKVLVLDGVIQLTERDECAYQEMITHLPLC--SIPN-PK----------------------K-----VLVIGGGDGGVLREVARHAS-----IEQIDMCEIDKMVVDVSKQFFPD----VAI------G-YE--D---PRVNLVIGD------------------GVAFLKNA----------AEGSYDAVIVDSSD-P--I---G-----P-AKELFE--KPFFQSVARA-LR-PGGVVCTQA--ESLWLHMDIIEDIVS--NCREI-F---------------K-GSVNYAWTSVPTYP---------S----GVIG--FML----CST---------EG---P--------D--VD--------FK--H-----P--------LN---------PI----D---ESS--------------SKSN-G---P----LKFYNA-EIHSAAFCLPSFA-KK---VIESKAN----------------------------------------------------------------------------------------------------------------------------------------------------------------
>Arabidopsis_thaliana_SPDS2
--------------------------------------------------------------------------------------------------------------------------------------------------MSSTQEASVTDLPVKRPREAEEDNNGG---------------------------------AMETENG----------GGEIKEPSCMSS----------------------IIPG-------------------------------------------------------------------------WFSEI---------------------SPMWP------G---EAHSLKVEKILFQGKSDYQDVIVFQ---SA-TYGKVLVLDGVIQLTERDECAYQEMITHLPLC--SISN-PK----------------------K-----VLVIGGGDGGVLREVARHSS-----VEQIDICEIDKMVVDVAKQYFPN----VAV------G-YE--D---PRVNLIIGD------------------GVAFLKNA----------AEGTYDAVIVDSSD-P--I---G-----P-AKELFE--KPFFESVNRA-LR-PGGVVCTQA--ESLWLHMDIIEDIVS--NCRDI-F---------------K-GSVNYAWTSVPTYP---------S----GVIG--FML----CSS---------EG---P----------QVD--------FK--K-----P--------VS---------LI----D-------------------TDESSIKSHCP----LKYYNA-EIHSAAFCLPSFA-KK---VIDSKAN----------------------------------------------------------------------------------------------------------------------------------------------------------------
>Arabidopsis_thaliana_SPMS
----------------------------------------------------------------------------------------------------------------------------------------------------MEGDVGIGLVCQNTMDGKASNGNGL---------------------------------EKTVPSC-CLKAMA---CVPEDDAKCHST----------------------VVSG-------------------------------------------------------------------------WFSEP------HPRSGKKGGKAVYFNNPMWP------G---EAHSLKVEKVLFKDKSDFQEVLVFE---SA-TYGKVLVLDGIVQLTEKDECAYQEMIAHLPLC--SISS-PKNVISHLKKFSLSGFLYLVACCNKSVNLKVLVVGGGDGGVLREISRHSS-----VEVIDICEIDKMVIDVSKKFFPE----LAV------G-FD--D---PRVQLHIGD------------------AAEFLRKS----------PEGKYDAIIVDSSD-P--V---G-----P-ALALVE--KPFFETLARA-LK-PGGVLCNMA--ESMWLHTHLIEDMIS--ICRQT-F-----------------KSVHYAWSSVPTYP---------S----GVIG--FVL----CST---------EG---P----------AVD--------FK--N-----P--------IN---------PI----E---KLD-------------GAMTHKR---E----LKFYNS-DMHRAAFALPTFL-RR---EVASLLAS---------------------------------------------------------------------------------------------------------------------------------------------------------------
>Atrichopoda|evm_27.TU.AmTr_v1.0_scaffold00006.317
------------------------------------------------------------------------------------------------------------------------------------------------------------------------------------------------------------------------------------------------------------------------------------------------------------------------------------------------------------------------------------------------------------MVFQ---SS-TYGKAFVLDGLLQLTERDECAYQEMITHLPLC--SIPK-PK----------------------K-----VLVTGGGDGGILRELSRHAS-----VEQIDICEIDTMVVNVYKQFFPD----IAV------G-YE--D---PRITLHVGD------------------GTAFLKSV----------PPGTYDVIIVDSCD-P--I---V-----P-TQELFD--KPFYELVAKA-LR-PGGVVCTQA--ESIWLHAQIIEDTVT--VCRQV-F---------------K-GSVNYAWTSVPTYQ---------S----GVIG--FML----CST---------EG---P----------AVD--------FK--C-----P--------VN---------RI--------EAI-------------DGANS-VAKHP----LKFYNS-EV------------R*--------------------------------------------------------------------------------------------------------------------------------------------------------------------------
>Atrichopoda|evm_27.TU.AmTr_v1.0_scaffold00024.210
--------------------------------------------------------------------------------------------------------------------------------------------------------MGEAANVFNLSDKKYDCNGNG--------------------------------------------------CGVVVESRRPCC---------------------------------------------------------------------------------------------------WYEEE-----------------IYD-DLRWS--------------FALNSILHTGTSEFQDIALLD---TK-HFGKALIIDGKMQSAEMDEFIYHECLVHPALL--YHSN-PK----------------------T-----VFIMGGGEGSTAREILKHRT-----IEKVVMCDIDEEVVDFCRRYLVA----NRE------A-FN--N---RKLHLVIND------------------ARAELEKT-----------QEKFDVIVGDLAD-P--V-EGG-----P-CYLLYT--QCFYQNILKPKLN-HKGIFVTQAGPAGVLTHKEVFSSIYN--TLKNV-F---------------K-YVKAYT-AHVPSFA--------------DTWG--WVM----ASD----------E---P---------------------FE--L-----D--------AE---------KM----D---IGI-------------GERIK-G---E----LLYLDG-ESFISSTTMNKSV-YQ---SLLKETH----VYT----EENAR-----------FIY---GHGRACLP*----------------------------------------------------------------------------------------------------------------------
>Atrichopoda|evm_27.TU.AmTr_v1.0_scaffold00061.111
-----------------------------------------------------------------------------------------------------------------------------------------------------------------MAEEKVIVSGEK---------------------------------NGSHSSCRFGDMEA---DGNKKTPECISS----------------------VLPG-------------------------------------------------------------------------WFSEF---------------------SSMWP------G---EAHSLKVEKILFQDKSQYQDVMVFQ---SS-TYGKVLVLDGVIQCTERDECAYQEMITHLPLC--SIPN-PK----------------------K-----VLVIGGGDGGVLREVARHSS-----IEQIDICEIDAMVVDVSKQFFPD----MAV------G-YE--D---PRVKLHIGD------------------GVAFLKAV----------PEGTYDAVIVDSSD-P--I---G-----P-AQELFE--KPFFEAVAKA-LR-PGGVVCTQA--ESIWLHMHIIEDIVD--VCRQV-F---------------K-GSVNYAWTSVPTYP---------S----GVIG--FML----CST---------EG---P----------AVD--------FR--H-----P--------VN---------IL--------DDC-------------DGKAKQS--------LKFYNS-DIHSAAFCLPTFA-KR---AISAKIK------------HIN*------------------------------------------------------------------------------------------------------------------------------------------------
>Atrichopoda|evm_27.TU.AmTr_v1.0_scaffold00103.14
------------------------------------------------------------------------------------------------------------------------------------------------------------MADIPHTNGNGIHTMAR--------------------------------------------------EFGEDRRKCC-----------------------------------------------------------------------------------------------------WYEEE-----------------IEQ-DLRMC--------------YALKSILHTGASNYQDITLLD---TR-PFGKALIIDGKLQSAEIDEFIYHECLVHPALL--HHPN-PK----------------------S-----VFIMGGGEGSTAREILKHKS-----VEFVVMCDIDEEVVDFCKSHLLV----NQE------A-FM--D---SRLQLIIND------------------AKAELEKR-----------EELFDVIIGDLAD-P--L-EGG-----P-CYQLYT--KSFYESIVKPGLN-EGGIFVTQAGPAGVLTHTEVFSCIYN--TLKQV-F---------------K-YVVPYS-AHIPSYA--------------DTWG--WII----ASD----------E---P---------------------FT--A-----N--------AE---------EL----D---KRS-------------KQRIN-G---E----NRYLDG-KTFSSASMLSKIV-RK---SLAKETQ----VYT----EESAK-----------FIY---GHGAGHNNHA*--------------------------------------------------------------------------------------------------------------------
>Atrichopoda|evm_27.TU.AmTr_v1.0_scaffold00159.8
-----------------------------------------------------------------------------------------------------------------------------------------------------------------MGLKREETGVDA---------------------------------SKELPPC-CLKAMA---ALPESESKCINT----------------------VVTG-------------------------------------------------------------------------WFSEP---------QSFSGESCKYFNNPMWP------G---EAHSLKVEKILFKGKSDYQEILVFE---ST-SYGKVLVLDGIVQLTEKDECAYQEMIAHLPLC--SLPS-PK----------------------N-----VLVVGGGDGGVLREISRHSS-----VERIDICEIDKMVIDVCEKYFPY----LSL------G-FE--D---PRVSLHVGD------------------AAKFLREA----------SEGMYDAIIVDSSD-P--I---G-----P-AQELVE--RPFFETIARA-LR-PGGVLCTMA--ESMWLHTHLIQDMLS--ICRAT-F---------------K-GSVHYAWTSVPTYP---------S----GSIG--FMI----CST---------DG--PP-----------VD--------FL--N-----P--------VN---------PI----E---KQD-------------ARKSQ-R---E----LKFYNT-EMHKAAFALPSFA-KK---ELNKFLT-----------PQTVK-----------VI*----------------------------------------------------------------------------------------------------------------------------------
>AUDE_scaffold_2057051_Widdringtonia_cedarbergensis
--------------------------------------------------------------------------------------------------------------------------------------------------------------------------------------------------------------------------------------------------------------------------------------------------------------------------------------------------------------------------------------------------------------------------------------MDEFIYHESLVHPALF--HHPN-PK----------------------S-----AFIMGGGEGSTAREILKHKT-----INKVVMCDIDEEVVDFCKQHLTA----NQE------A-FS--S---SRLDLVIND------------------ARAELETR-----------AEYFDVIIGDLAD-P--I-EGG-----P-CYQLYT--KSFYERVVKPKLC-RGGIFVTQAGPAGVLSHTQVFSCIYN--TLRHV-F---------------K-YVVPYS-AHIPSFA--------------DTWG--WVM----ASD----------Y---P---------------------FT--L-----T--------SE---------EI----D---SKI-------------KQRTD-G---D----LRYLDG-QTFIGASILSKSV-RK---ALAKENH----IYT----EESAR-----------YIY---GHG-AAHK-LHN*------------------------------------------------------------------------------------------------------------------
>AUDE_scaffold_2060585_Widdringtonia_cedarbergensis
-------------------------------------------------------------------------------------------------------------------------------------------------MADNNLNNGASSVPLDLPIKRPRSQEEI---------------------------------DNHSAPP--SLQET---AMEDGAGESYPS----------------------VIPG-------------------------------------------------------------------------WFAEM---------------------SPMWP------G---EAHSLKVEKVLFHKKSDFQDVIVFE---SA-TYGKVLVLDGVIQLTERDECAYQEMITHLPLC--SIPN-PK----------------------K-----VLVIGGGDGGVLREVSRHNS-----VEQIDICEIDGMVVNVSKEFFPS----IAV------G-FQ--D---PRVKLSIGD------------------GVAFLKDC----------PEGTYDAVIVDSSD-P--I---G-----P-AEELFK--KPFFESVARA-LR-PGGVVCTQA--ESMWLHMPIIEDIVN--VCRQT-F---------------K-GSVNYAWTTVPTYP---------S----GMIG--FML----CST---------EG---P----------PVD--------FR--H-----P--------IN---------AI----D---KQE-------------CNIKSLG---P----LRFYNS-EMHTAAFCLPAFA-RR---AIGSRVQ-----------PSSS*------------------------------------------------------------------------------------------------------------------------------------------------
>AWOI_scaffold_2001100_Diphyscium_foliosum_78
------------------------------------------------------------------------------------------------------------------------------------------------MAMRRTDDEQAAAEGARNAAELIAQDNAA--------------------------------------------------PLPSTARANLSS----------------------IMPG-------------------------------------------------------------------------WFSEV---------------------SPMWP------G---EAHSLKVEKFLFEGKSDYQDVVVFE---SA-TYGRVLVLDGVIQLTQRDECAYQEMITHLPLC--SIPN-PK----------------------Q-----VLVVGGGDGGVLREVSRHKS-----IEQIDICEIDKLVVDVAKEFFPD----VAV------G-FE--D---PRVNLHIGD------------------GVAFLREV----------PEGTYDAIIVDSSD-P--V---G-----P-AQALFE--RPFYKTLDRA-LR-PGGVICTQA--ESLWLHMPIIKDIVA--ACRHT-F---------------K-GSINYAWTSVPTYP---------S----GVIG--FML----CST---------AG---P----------SVN--------FR--E-----P--------CN---------PI----D---EAV-------------DAKPSSR--RP----LKFYNS-AMHAAAFSLPQFA-RE---ELENLLT----------PPPSS*------------------------------------------------------------------------------------------------------------------------------------------------
>AWOI_scaffold_2069988_Diphyscium_foliosum_75
------------------------------------------------------------------------------------------------------------------------------------------------------------MVEFFEEERNGVHANGT------------------------------------------SHQSPVNNLIAAAEPKKRCL---------------------------------------------------------------------------------------------------WFEEE-----------------LEE-DLRWV--------------FGVSKILHTGVSEFQDIELVE---SG-PFGKVLILDGKLQSAEADEFVYHESIVHPALL--YHPN-PR----------------------S-----VFVMGGGEGSTAREALRHRN-----VEEVVMCDIDREVVNFCRKHLTA----NAE------A-FH--N---SRLTLVINC------------------ARAELEKR-----------TEQFDVIIGDLAD-P--V-AGG-----P-CYQLYT--KSFYERILKPRLK-HGGILVTQGGPAGILTHTEVYSSIYN--TLRQT-F---------------K-YVVPYA-AHVPSYA--------------DTWG--WVM----ASD----------Q---P---------------------LP--T--------------IS-------GDET----D---SRI-------------KQRVD-G---E----LRFLDG-QTLSAAIALNKRV-RK---SLAAERH----VYT----EETAR-----------FIH---GHGTALRN-----------------------------------------------------------------------------------------------------------------------
>AWOI_scaffold_2071939_Diphyscium_foliosum
---------------------------------------------------------------------------------------------------------MLRFVYIHNSSSSTNLAYLIIKSSVSSFIVYKAKKSVDYFIFLYKAYKLYRSCQGGAALEGAAAVFSKVVSIESCEAESHMPVRAMAMGRTGDEQAAAADHGSSRNAA-ELIGQGNAAPTPSTARANLSS----------------------IMPG-------------------------------------------------------------------------WFSEI---------------------SPMWP------G---EAHSLKVEKFLFEGKSDYQDVVVFE---SA-TYGRVLVLDGVIQLTQRDECAYQEMITHLPLC--SIPN-PK----------------------K-----VLVVGGGDGGVLREVARHKS-----IEQIDICEIDKLVVDVAKDFFPD----VAV------G-FD--D---PRVNLHIGD------------------GVAFLREV----------PEGTYDAIIVDSSD-P--V---G-----P-AQALFE--RPFYQSLARA-LR-PGGVVCTQA--ESLWLHMPIIKDIVT--ACRQT-F---------------K-GSINYAWTSVPTYP---------S----GVIG--FML----CST---------AG---P----------SVN--------FR--E-----A--------CN---------PI----D---QAV---------------DDKQSSRRP----LKFYNS-AMHAAAFALPQFA-RD---VLEPLFT----------PPPLS*------------------------------------------------------------------------------------------------------------------------------------------------
>BAZF_scaffold_2069812_Chaetopeltis_orbicularis
--------------------------------------------------------------------------------------------------------------------------------------------------------------------------------------------------------------MEYNRRI-------------------------------------------------------------------------------------------------------------------------WFEEI-----------------LAD-DLKWS--------------MAVKKVLYSGKSEFQEIDLID---TD-VFGTVLLLDGKMQSTQSDEWVYHELLVHPAML--HHPN-PK----------------------T-----VFIMGGGEGATAREVLRHTT-----VEKVVMVDIDKVVCDACRTHLEH----NQA------A-FA--D---PKLELINDD------------------ALVQLQNY-----------PGKFDVIIGDLAD-P--L-DGG-----P-CYQLYT--QDFYKNTLIPKLN-PGGVFITQSGPAGFTSSHEVFTCIHN--TIRSA-F---------------P-VVLPYL-QYIPSFC--------------DCWG--WNLAFTDASQ----------G-------------------------LL--------P--------AA---------EI----D---ARA-------------VKRIT-G---A----LRFMDG-ETLHGLTHLNKHL-RT---ALANEKE----IFT----ADNPR-----------FIH---GGGVATAKTAQSNGIEAEGNGDDAKCNGCS*------------------------------------------------------------------------------------------------
>BFIK_scaffold_2028289_Entransia_fimbriat
----------------------------------------------------------------------------------------------------------------------------------------------------------------------------------------------------------------------------------MTSSAKL-----------------------------------------------------------------------------------------------------WCEEE-----------------IED-DLKWV--------------FGVKKILHSGKSKFQDIELLE---TG-PFGKVLVLDGKLQSSEVDEFVYHECLVQPAIL--HHPN-PK----------------------A-----VFIMGGGEGSTAREVLRCKS-----VEKVVMCDIDEVVVDFCRSHLTD----NKE------A-FA--D---PRLKVVIND------------------ARAELEQS-----------TDKFDIIVGDLAD-P--V-EGG-----P-CYKLYT--KEFYETVVKAKLN-PGGLFVTQAGPAGITSFRGVYSPIAN--TLRQI-F---------------T-NVIPYA-THITSFA--------------DTWG--WML----ASM----------E---P-----------LV--------IK--P-----P------------------PEV----D---ALI-------------ASRLS-S---P----LRFLDG-DTLVSISTLSKHV-RK---GLEAETS----LFT----EDSLH-----------FIH---GHG-IAPA-ASE*------------------------------------------------------------------------------------------------------------------
>BFIK_scaffold_2029632_Entransia_fimbriat
-------------------------------------------------------------------------------------------------------------------------------------------------------------MAANEKNGVQILNSGP---------------------------------TKDELRS----------QKPAESAALVGT----------------------VMKG-------------------------------------------------------------------------WFSEI---------------------SPMWP------G---EAHCLQIKEVLFQGRSKFQDVMVFE---SE-TYGRVLVLDGVIQLSERDEAGYQEMIAHLPLC--SIKE-AK----------------------K-----VLVVGGGDGGVLREIARHAS-----IERIDMCEIDEMVVELSKKYFPD----VSI------G-FD--D---PRVNLIIGD------------------GVAFVRDA----------APGTYDAIIVDSSD-P--V---G-----P-AQQLFE--RPFFESMARA-LR-PGGVCCTQA--ESLWLHLPIIKDLAA--ACSKI-F---------------AGGSLAYAYTTVPTYP---------S----GQIG--FML----CAT--------------P------GSPYPVD--------FK--T-----P--------LT---------DI----G---DAA-------------NQSASLLKLKP----LRYYSK-ELHSASFILPRFA-RD---ALAEYLA--------------V*------------------------------------------------------------------------------------------------------------------------------------------------
>BGXB_scaffold_2005911_Plagiomnium_insigne_80
---------------------------------------------------------------------------------------------------------------------------------------------------------------MVKGKSNGVHVNGA-------------------------------------AAA-TTVTVA---PSVEAEHKKRCL---------------------------------------------------------------------------------------------------WFEEE-----------------LEE-DLRWV--------------FGVSKILHTGVSEFQDIELVE---SG-PFGKVLILDGKLQSAEADEYVYHESLVHPALL--YHSN-PK----------------------N-----VFIMGGGEGSTAREALRHRS-----VEEVVMCDIDEEVVNFCRKHLTV----NAE------A-FS--S---HRLELVINC------------------ARAELEKR-----------TEQFDIIIGDLAD-P--V-AGG-----P-CYQLYT--QSFYERVLKPRLK-VGGIFITQGGPAGILSHTEVYTSIYN--TLRET-F---------------E-YVVPYA-AHVPSYA--------------DTWG--WVM----ASD----------Q-AIP---------------------AI--S-----P---------E---------ET----D---SRI-------------KQRID-G---E----LKFLDG-QTLSASIALNKHV-RT---SLAAEQH----VYT----EETAR-----------FIH---GHGTALKN*----------------------------------------------------------------------------------------------------------------------
>BGXB_scaffold_2079340_Plagiomnium_insigne
----------------------------------------------------------------------------------------------------------------------------------------------------------MAEEGSRNAAELIAQDNAA--------------------------------------------------PAPSTARANLSS----------------------IMPG-------------------------------------------------------------------------WFSEI---------------------SPMWP------G---EAHSLKVEKFLFEGKSDYQDVVVFE---SA-TYGRVLVLDGVIQLTQRDECAYQEMITHLPLC--SIPN-PK----------------------K-----VLVVGGGDGGVLREVSRHKS-----VEQIDICEIDKLVVDVAKEFFPD----VAI------G-FD--D---PRVHLHIGD------------------GVAFLKEV----------PEGTYDAIIVDSSD-P--V---G-----P-AQALFE--RPFYKSLDRA-LR-PGGVICTQA--ESLWLHMPIIKDIVA--ACSHT-F---------------K-GSINYAWASVPTYP---------S----GVIG--FML----CST---------AG---P----------FVN--------FR--E-----P--------CN---------PV----D---KAV-------------DDKPSIR--RP----LKFYNS-AMHAAAFSLPQFA-EE---ELEHLLT----------PPPSS*------------------------------------------------------------------------------------------------------------------------------------------------
>BHBK_scaffold_2005199_Cosmarium_tinctum
-----------------------------------------------------------------------------------------------------------------------------------------------------------------MAEDKAGKFTGE---------------------------------------------------TQGTARANMDT----------------------VMKG-------------------------------------------------------------------------WFSEV---------------------SPMWP------G---EAHSLKIEEVLFEGKSDFQDVVVFK---SA-TYGKVLVLDGVIQLTERDECAYQEMITHVPLC--SIPS-PK----------------------R-----VLVVGGGDGGVLREVSRHVG-----IERIDIVEIDKMVIDVSKEHFPQ----VAV------G-YT--D---PRVHVTVGD------------------GVQFLKDA----------EEGTYDAIIVDSSD-P--I---G-----P-AKQLFE--RPFFESMARA-VR-KGGVVCTQA--ESLWLHLPIIKEIAQ--ACKHS-F---------------G-GSVNYAWTSVPTYP---------S----GTIG--FMV----CST---------PG---P----------VVH--------FR--T-----P--------CN---------RI----E---DQA-------------PRPSHLPALPP----LKYYNS-EVHSAGFVLPQFA-KE---ALDEYLT--------------K*------------------------------------------------------------------------------------------------------------------------------------------------
>BHBK_scaffold_2008956_Cosmarium_tinctum
------------------------------------------------------------------------------------------------------------------------------------------------------------MEHGEGNGVGPVTSNGP----------------------------------SKGPVA----------AKEGDGGGRVRL---------------------------------------------------------------------------------------------------WFEEE-----------------LEE-DLRWV--------------FGVRNILHKTVSEFQDIELMD---SG-PFGKVLVLDGKLQSAEADEFVYHESLVHPALL--HHPD-PR----------------------L-----VFIMGGGEGSTARECLRHRS-----VERVDMCDIDKVVVDFCREHLTE----NAK------T-FA--S---PRLNLIIND------------------AREELLSG----------SGSGYDVIIGDLAD-P--V-DGG-----P-CYKLYT--EAFYKAVLKPRLK-EGGILVTQAGPAGILSAKEVYTPIYN--TLRQV-F---------------K-YVVPYA-SHVPSYA--------------DTWG--WIM----ASD----------T---P---------------------FP--A----FA--------AE---------AV----D---RRI-------------EERVE-G---E----LKFLDG-PTGMAQLALNKHV-RK---MLAEETT----VYT----EDSPL-----------FIHGQGTQGCHGTQR*---------------------------------------------------------------------------------------------------------------------
>BMJR_scaffold_2059692_Adiantum_tenerum
-------------------------------------------------------------------------------------------------------------------------------------------------------------------------------------------------------------------------MEG---VKPGTGRANISS----------------------VIPG-------------------------------------------------------------------------WFSEI---------------------SPMWP------G---EAHSLEVKEILFEGKSNFQDVLVFQ---SA-TYGKVLVLDGVIQVSERDECAYQEMITHLPLC--SIPN-PQ----------------------K-----VLVIGGGDGGVLREVARHKS-----VKQIDICEIDQMVIDVAKKFFPH----IAV------G-FA--D---PRVNLFVGD------------------GAIFLKEV----------PNGFYDAVIVDSSD-P--I---G-----P-AQQLFE--TPFFESLARV-LR-PGGVVCTQA--ESVWLHMHIIKDIFS--SCRKT-F---------------K-GSVNYAWTSVPTYP---------S----GVIG--FML----CST---------EG---P----------AVN--------FR--Q-----P--------IN---------PI----E---ELG------------SDNKLS-----P----LKFYNS-ELHSASFCLPQFA-RE---ALDA*------------------------------------------------------------------------------------------------------------------------------------------------------------------
>BMJR_scaffold_2061153_Adiantum_tenerum
----------------------------------------------------------------------------------------------------------------------------------MAGLEVGLEVKEDQQNSVVPAAPKRPIGDNGAPPCHGLSTTGD--------------------GCIIKTMPHHFCCPRGVDPH--APGAT---ATPGTGRANLSN----------------------GIPG-------------------------------------------------------------------------WYSEI---------------------NPMWQ------G---EAHSLRVDKILFEGKSDYQDVLVFQ---SE-AYGKVLVLDGVTQLTERDECAYQEMITHLPLC--SIPN-PK----------------------K-----VLVIGGGDGGVLREISRHDS-----VEQIDICEIDEMVVDVSKKFFPQ----LAV------G-YE--D---PRVKLFIGD------------------GATFLKDA----------TEGFYDAVIVDSSD-P--I---G-----P-AQQLFE--KPFFDLVARA-LR-PGGVLCTQT--ESLWLHVHTIQDLVA--VCKQT-F---------------K-GSINYAWTSVPTYP---------S----GVIG--LML----CAT---------EG---P----------EVN--------FR--Q-----P--------VN---------LI----E---KQE--------------SAIKEGKCRP----LKYYNS-EMHTAAFCLPQFV-RM---LLEPVIF------------SGA*------------------------------------------------------------------------------------------------------------------------------------------------
>BMJR_scaffold_2061377_Adiantum_tenerum
-------------------------------------------------------------------------------------------------------------------------MSPSMAAETACYPSNALPPSSRDHPFSNASFVSSTYAAAANNGGSTAKHLST---------------------------------SSSNGIL-SNNYSNGSVPPPNPPIASLQGVQVAPPPHNIFSNANSPIAKAVLING-----------------------------SNNSHGNKVSNICNTSNNGQASQTPGTPPLMAHAEVTAPQRPSLWFEED-----------------LGE-SLRWS--------------FGLKRILHTGCSKYQDIALLD---TE-PFGKVLTLDGRMQSAQIDEWVYHECLVHPALL--LHQG-PR----------------------S-----VFIAGGGEGSTARECLLHKS-----IRKVIMCDIDEEVVKFCNAHLTV----NKE------A-FQ--S---SKLELVIND------------------AKAELKRR-----------EERFDVIIADLAD-P--L-EWG-----P-CYTLYC--QGFYQNIVKPRLN-PNGIFVTQAGPAGVLSHREVFTSIYN--TLKSV-F---------------T-YVVAYT-AHVPSYC--------------DVWG--WVV----ASD----------Q---P---------------------LM--S-----Q--------MS-------SEEL----D---CRI-------------SQRIKGG---Q----LRYLDG-PTLYASTILNRTL-RE---SLENEKH----VYT----EESAR-----------FVY---GQGRITNAGTHN*------------------------------------------------------------------------------------------------------------------
>BMJR_scaffold_2062018_Adiantum_tenerum
-------------------------------------------------------------------------------------------------------------------------MAETACLTPYPSKSMAPSTRDLPPFPNPSPLHSYVSNSLSSYTFNGGGGGST-------------------PTPTSTPKASPLQPSSNGITP-SHNVIQGVPPSVYVNGTHLHNANSGKAGADEFQYGISTSSKPAIINS------------------------------------------------AEQVSHPNGNLLAQPDIASPRRPSLWYEEE-----------------IDE-SLRWS--------------FGLTSILFTGCSRFQEIALLD---TE-PFGKVLTLDRKMQSAEKDEWVYHECLVHPPLL--LHPC-PK----------------------S-----IYIMGGGEGSTAREALRHRS-----VRKVVMCDIDEEVVKFCRSHLTC----NAE------A-FR--S---NRLELVIDD------------------AKANLESR-----------DERFDIIIGDLAD-P--L-EWG-----P-CYLLYT--KGFYESIVKPKLN-PGGILVTQAGPAGILSHKEVFTSIYN--TLRQV-F---------------T-YVVAYS-AHVPSYA--------------DTWG--WVM----ASD----------Q---P---------------------FT--Q--------------IS---------AI----DELDYKI-------------KQRIK-G---E----LRYLDG-ATLHASTILNKTV-RE---SLAKEIH----VYT----EDSAR-----------FLY---GHGRSANTH*---------------------------------------------------------------------------------------------------------------------
>BNCU_scaffold_2018987_Radula_lindenbergia
--------------------------------------------------------------------------------------------------------------------------------------------------------------MSVASIYSNLNGKAD--------------------------------------------------HGVVLMRGEFGE----------------------FISG---------------------------------------------------------------------------------------------------HPAFL------FDTGEAHSLKVDEQLFEGRSDYQHVQVFQ---SE-SYGKVLVLDGVIQLTERDEFSYQEMITHLPLC--SVQN-PK----------------------K-----VLVIGGGDGGVLREVSRHTS-----VERVDICEIDKMVIDVSKSFFPE----VAV------G-FE--D---PRVNVNIGD------------------GVKYLESA----------PAQFYDVIIVDSSD-P--I---G-----P-AEGLFQ--RPFYESLARA-LR-PGGVACTQA--ESIWLHLPIIKEVMN--INSSI-F---------------K-GSINYAWTSVPTYP---------S----GVIG--FML----CST---------EG---P----------SVN--------FS--Q-----P--------SN---------PI----E---SFA------------SSEDSLKLVKRP----LKYYNS-QVHTAAFVLPEFA-RE---SLVHVLT----SYTESPGSLSGK-------------------GKPSS*-----------------------------------------------------------------------------------------------------------------------
>BNCU_scaffold_2083653_Radula_lindenbergia
----------------------------------------------------------------------------------------------------------------------------------------------------------------------------------------------------------------------------------------------------------------------------------------------------------------------------------------------------------------------------------------------------------------------------------QCTERDEFSYQEMITHLAMN--SHPN-PK----------------------S-----VLVVGGGDGGVLREVVKHES-----VEKAILCDIDEAVPRVSKKYLPG----MSI------G-FQ--H---PAVEVHIGD------------------GFKFLADR-----------KNEFDVIITDSSD-P--E---G-----P-AESLFQ--KPYFELLSGA-LK-DGGVITTQA--ENQWLHLPLITKLKK--DCKEV-F-----------------PVVEYAYTTIPTYP---------S----GQIG--FMV----CCK----------D---P---------------ARD---VK--N-----P--------LR-----AWTPEE----E---EKL----------------------------CKYYNK-EIHKASFILPTFA-RK---ALK*-------------------------------------------------------------------------------------------------------------------------------------------------------------------
>BNCU_scaffold_2085596_Radula_lindenbergia
-----------------------------------------------------------------------------------------------------------------------------------------------MTEAITTTATLHVNGSGPHMGSTMVSVGSK------------------------RYLNPGDIIPTSQLNG-LSNGTAMHANGFPGKNNSKNR----------------------TFGG--------------------------------------------------------------------SNRPFWFEEE-----------------LEE-DLRWV--------------FRVSKTLHTGVSPFQNIMLVE---SQ-PFGKVLLLDGKMQSAEVDEFVYHESLVHPACL--YHSN-PR----------------------T-----VFIMGGGEGSAAREVLRHRM-----VNKVVMCDIDEEVVDFCKKYLTV----NAE------A-FE--N---PRLELVIDC------------------ARAELERR-----------EEQFDIIVGDLAD-P--V-DGG-----P-CFKLYT--QSFYETVVKPKLA-PGGILVTQGGPAGILTHKHVYTSIFN--TLRQV-F---------------K-YVVPYA-AHVPSYA--------------DTWG--WVM----ASD----------E---P---------------------FS--------P------FSVE---------NT----E---ARI-------------SERIK-G---E----LKFLDG-ETLRATLALNKHV-RS---SLIRETH----VYT----EETAR-----------FIH---GQGKGTKA*----------------------------------------------------------------------------------------------------------------------
>BPSG_scaffold_2018242_Scouleria_aquatica_78
-----------------------------------------------------------------------------------------------------------------------------------------------------------------MVESNGAYVNGT---------------------------------SHQSPAT--KTAVA---GEAETKKRCL-----------------------------------------------------------------------------------------------------WFEEE-----------------LEV-DLRWV--------------FGVSKILHTGVSEFQNIELVE---SG-PFGKVLILDGKLQSSEADEFVYHESIVHPALL--YHSN-PK----------------------N-----VFIMGGGEGSTAREALRHRS-----VEKVVMCDIDEEVVNFCRKHLTV----NAE------A-FR--S---NRLDLTINC------------------ARAELEKR-----------MEQFDVIIGDLAD-P--V-AGG-----P-CYQLYT--KSFYERVLKPRLN-EGGILVTQGGPAGILSHTEVYSSIYN--TLRQT-F---------------K-YVTPYA-AHVPSYA--------------DTWG--WIM----ASD----------Q-PLP---------------------TI--S--------------VE---------ET----D---SRI-------------KQRLD-G---E----LQFLDG-QTLSATMSLNKHV-RK---SLAAERH----VYT----EETAR-----------FIH---GHGTKI*------------------------------------------------------------------------------------------------------------------------
>BPSG_scaffold_2018243_Scouleria_aquatica_79
-----------------------------------------------------------------------------------------------------------------------------------------------------------MVEYNFEESSNGVHINGT--------------------------------------------------TSPAAAEVEPKK------------------------------------------------------------------------------------------------RCLWFEEE-----------------LEE-DLRWV--------------FGVSKILHTGVSEFQDIQLVE---SG-PFGKVLILDGKLQSAEADEYVYHESIIHPALL--YHPN-PK----------------------N-----VFIMGGGEGSTAREALRHRS-----VEEVVMCDIDEEVVNFCRKHLTV----NAE------A-FC--S---NRLDLVINC------------------ARAELEKR-----------TEQFDIIIGDLAD-P--V-AGG-----P-CYQLYT--KSFYERVLKPRLR-DGGILVTQGGPAGILSHTEVYSSIYN--TLRQT-F---------------K-YVVPYA-AHVPSYA--------------DTWG--WVM----ASD----------Q-PIP---------------------TM--S--------------AE---------ET----D---SRV-------------QQRVD-G---E----LQFLDG-QTLSATMALNKHV-RK---SLAAERH----VYT----EETAR-----------FIH---GHGTALKN*----------------------------------------------------------------------------------------------------------------------
>BPSG_scaffold_2088075_Scouleria_aquatica
--------------------------------------------------------------------------------------------------------------------------------------------------------------------MAAPEECTR---------------------------------NAAETIV--QDNAA---PAPSTGRANFST----------------------IMSG-------------------------------------------------------------------------WFSEI---------------------SPMWP------G---EAHSLKVEKFLFEGKSDYQDVVVFE---SA-TYGRVLVLDGVIQLTQRDECAYQEMITHLPLC--SIPN-PK----------------------K-----VLVVGGGDGGVLREVSRHKS-----IEQIDICEIDKLVVDVAKEFFPD----VAV------G-FE--D---PRVNLHIGD------------------GVAFLREV----------PEATYDAIIVDSSD-P--V---G-----P-AQALFE--RPFYKTLDRA-LR-PGGVICTQA--ESLWLHMPIIKDIVG--ACRHT-F---------------K-GSINYAWTSVPTYP---------S----GVIG--FML----CST---------AG---P--------S--VN--------FR--E-----P--------CN---------PL----D---KAV--------------NDKP-SSRRP----LKFYNS-AMHAAAFSLPQFA-RE---ELEHLLT----------PPPSS*------------------------------------------------------------------------------------------------------------------------------------------------
>BUWV_scaffold_2012549_Platycladus_orientalis
-------------------------------------------------------------------------------------------------------------------------------------------------MADNNTNNGASSVALDLPIKRPRSQEEI---------------------------------DNHSAVP--SSQET---AMEDGAAESYPS----------------------VIPG-------------------------------------------------------------------------WFAEM---------------------SPMWP------G---EAHSLKVDKVLFHEKSDFQDVMVFE---SA-TYGKVLVLDGVIQLTERDECAYQEMITHLPLC--SIPN-PK----------------------K-----VLVIGGGDGGVLREVSRHNS-----VEQIDIC?---MVVNVSKEFFPN----VAV------G-FQ--D---PRVKLCIGD------------------GVAFLREC----------SEGTYDAVIVDSSD-P--I---G-----P-AEELFK--KPFFESVARA-LR-PGGVVCTQA--ESMWLHMPIIEDIVN--VCRQT-F---------------K-GSVNYAWTTVPTYP---------S----GMIG--FML----CST---------EG---P----------PVD--------FR--H-----P--------VN---------AI----D---KQE-------------CNLKSLG---P----LRFYNS-EMHTASFCLPAFA-RR---AIGSKVQ-----------PPSS*------------------------------------------------------------------------------------------------------------------------------------------------
>BUWV_scaffold_2051579_Platycladus_orientalis
------------------------------------------------------------------------------------------------------------------------------------MGEAVATNGFSIKGNGNVHCNEYSNGHGHCNGYSKGSSNGF---------------------------------SNGIPHL-PHSNGNTVHHSNGQAHHMSPS----------------------FGDG--------------------------------------------------------------------RRRCFWYEEE-----------------IED-DLRWC--------------FALNRILHTGVSEYQDIALID---TR-PFGKALVIDGKMQSTEVDEFIYHESLVHPALV--YHSQ-PK----------------------S-----AFIMGGGEGSTAREILRHNC-----VKKVVMCDIDQEVVDFCKKYLVV----NRE------A-FS--N---SRLELVIND------------------ARTELQSR-----------QERFDVIIGDLAD-P--V-EGG-----P-CYQLYT--KSFYELVIKPKLN-PQGIFVTQAGPAGVLTHTQVFSSIYN--TLRQV-F---------------K-HVMPYS-AHVPSFA--------------DTWG--WVM----ASD----------H---P---------------------LS--L-----E--------AG---------EI----D---DRI-------------KQRVK-G---E----LQFLDG-QTFLVAATLNKSV-RK---SLSKETH----VYT----EETAR-----------FIH---GHGKASHQ*----------------------------------------------------------------------------------------------------------------------
>BZSH_scaffold_2034844_Golenkinia_longispicula
--------------------------------------------------------------------------------------------------------------------------------------------------MRAAILPHLACLTGYRTWRTRCHSGGN--------------------PTSQRFATLMAADADLAKRP--RLEEK---AAPGNANQGLNL----------------------VKDG-------------------------------------------------------------------------WYTEL---------------------SSMWP------G---QGLSLKVKEVLYTGRSDFQDICVFS---SE-SYGNVLVLDGVVQCTDRDEFSYQEMMTHIPLC--SLKDPLK----------------------K-----VLVVGGGDGGVLRELTRYPS-----LEEIHIAEIDAKVPEVAKQYFPL----MAV------G-FE--D---PRVQVHICD------------------GIKFVQDT----------PENTYDAIIVDSSD-P--V---G-----P-AEVLFE--KPFFEAMHRA-VR-PGGVVCTQA--ESLWLHLDIIKALAA--MCKEV-F---------------EGGTVAYAFTTIPTYP---------S----GQIG--MMV----CAK----------H---P----------------QDPGTPL--D-----P--------RN---------PA----Q---EVA-------------SPLGS-SKLPP----LKYYNT-EVHRSAFALPQFA-KE---ALQGSLT----FQ*---------------------------------------------------------------------------------------------------------------------------------------------------------
>BZSH_scaffold_2036029_Golenkinia_longispicula
-------------------------------------------------------------------------------------------------------------------------------------------------------------------------------------------------------------------------------MDTYTKRV-------------------------------------------------------------------------------------------------------WFEED-----------------LGD-DIKWS--------------MLVKKVLFSGKSPYQEVDLVD---TG-AFGKMLLLDGKTQSTEADEWVYHELLVHPALL--SHPN-PR----------------------R-----VFICGGGEGATAREVLRHKT-----VEKVVMVDIDKVVCDFCCEHLEV----NQA------A-FK--S---PKVELINKD------------------AGSELENY-----------PGRFDIIIGDLAD-P--L-DGG-----P-CYELYT--RDFYETVVKQKLN-PGGIFITQSGPAGILSCTEVFTSINT--TMKSV-F---------------P-TVIPYT-QHLPSYC--------------DVWG--WNMAFTDSSQ--------------E---------------------ML--S--------------IE---------EF----D---RRV-------------EERID-G---S----LKFLDG-HTFQGLTHLNKHL-RD---SLANETH----IYT----KDMPR-----------FIH---GQGQGR*------------------------------------------------------------------------------------------------------------------------
>CBAE_scaffold_2014007_Huperzia_myrisinites
-------------------------------------------------------------------------------------------------------------------------------------MAEADVVAVADMSAKRIRSDKEDVADGDGLLNGTASVESK---------------------------------NSAARIA--REDIA---PAPGSARANIDT----------------------VMSG-------------------------------------------------------------------------WFSEI---------------------SPMWP------G---EAHSLKVEKLLYEGKSDFQDVVVFE---ST-TYGRVLVLDGVIQLTERDECSYQEMITHLPLC--SIPS-PK----------------------K-----VLVVGGGDGGVLREVSRHNS-----IEQIDICEIDKMVVDVSKLYFPD----VAI------G-FE--D---PRVKLHIGD------------------GVAFLKEV----------SPGTYDAIIVDSSD-P--I---G-----P-AQQLFE--RPFFQSMAKA-LR-PGGVVCTQA--ESPWLHMHIIKDIVD--ACRQT-F---------------K-GSVNYAWTSVPTYP---------S----GVIG--FML----CST---------EG---H--------A--VN--------FR--K-----P--------VN---------PI----E---SID--------ATADTNGAVL-QRRKP----LKYYNS-EMHAAAFSLPQFA-RT---ALEPLLT-----------PEPLN*-----------------------------------------------------------------------------------------------------------------------------------------------
>CBAE_scaffold_2014748_Huperzia_myrisinites
-----------------------------------------------------------------------------------------------------------------------------------------MMAEADVVGVADAPAKRIRSDKEDVADGVGLNNGNA---------------------------------TVEPQNAAARIAREETAPAPGSARANIDT----------------------VMRG-------------------------------------------------------------------------WFSEM---------------------SPMWP------G---EAHSLKVEKFLFEGKSDFQDVVVFE---SA-TYGKVLVLDGVIQLTERDECSYQEMITHLPLC--SIPS-PK----------------------K-----VLVVGGGDGGVLREVSRHNS-----IEQIDICEIDKMVVDVSKIYFPD----VAI------G-FE--D---PRVKLHIGD------------------GVAFLKEV----------PAGTYDAIIVDSSD-P--I---G-----P-AQQLFE--RPFFQSMAKA-LR-PGGVVCTQG--ESPWLHMHIIKDIVD--ACHHT-F---------------K-GSVNYAWTSVPTYP---------S----GVIG--FML----CST---------EG---P----------PVN--------FR--L-----P--------IN---------PI----E---NID--------MTHSASGEAVLQRRKP----LKYYNS-EMHTAAFSLPQFA-RA---VLEPLLT----------PAPLS*------------------------------------------------------------------------------------------------------------------------------------------------
>CGDN_scaffold_2069237_Tetraclinis_sp.
-------------------------------------------------------------------------------------------------------------------------------------------MGEAVATNGSFSIKGNGNGYCNGYSNGNGHCNGY-----------------------SKGSSNGFSNGIPHLPL-PYSNGNTVHHSNGHAPHMSPS----------------------FGDG--------------------------------------------------------------------RRRCFWYEEE-----------------IED-DLRWC--------------FALNRILHTGVSEYQDIALID---TR-PFGKALVIDGKMQSTEVDEFIYHESLVHPSLV--YHSQ-PK----------------------S-----AFIMGGGEGSTAREILRHNC-----VKKVVMCDIDMEVVDFCKKYLVV----NRE------A-FN--N---SRLELVIND------------------ARTELQSR-----------QERFDVIIGDLAD-P--V-EGG-----P-CYQLYT--KSFYEFVLKPKLN-PQGIFVTQAGPAGVLTHTQVFSSIYN--TLRQV-F---------------K-HVMPYS-AHIPSFA--------------DTWG--WVM----ASD----------H---P---------------------LT--L-----E--------AG---------EI----D---DRI-------------KQRVK-G---E----LQFLDG-QTFLVASTLNKSV-RK---SLSKETH----VYT----EETAR-----------FIH---GHGKASHQ*----------------------------------------------------------------------------------------------------------------------
>CGDN_scaffold_2070436_Tetraclinis_sp.
-------------------------------------------------------------------------------------------------------------------------------------------------MADNNTNNGASSVALDLPIKRPRSQEEI---------------------------------DNHSAVP--SSQET---TMEDGAAESYPS----------------------VIPG-------------------------------------------------------------------------WFAEM---------------------SPMWP------G---EAHSLKVDKVLFHEKSDFQDVMVFE---SA-TYGKVLVLDGVIQLTERDECAYQEMITHLPLC--SIPN-PK----------------------K-----VLVIGGGDGGVLREVSRHNS-----VEQIDICEIDGMVVNVSKEFFPH----IAV------G-FQ--D---PRVKLCIGD------------------GVAFLREC----------SEGTYDAVIVDSSD-P--I---G-----P-AEELFK--KPFFESVARA-LR-PGGVVCTQA--ESMWLHMPIIEDIVN--VCRQT-F---------------K-GSVNYAWTTVPTYP---------S----GMIG--FML----CST---------EG---P----------PVD--------FR--H-----P--------IN---------AI----D---KQE-------------CNLKSLG---P----LRFYNS-EMHTASFCLPAFA-RR---AIGSKVQ-----------PSSS*------------------------------------------------------------------------------------------------------------------------------------------------
>CHJJ_scaffold_2020552_Lejeuneaceae_sp.
-----------------------------------------------------------------------------------------------------------------------------------------------------------------MAPPGGDTATGV--------------------------------------------------PATQSTSTNLGS----------------------LMTG-------------------------------------------------------------------------WFSEL---------------------GPMWP------G---EAHSLKVEKQLFEGQSDFQRVQVFQ---SE-SYGKVLVLDGVIQLTDRDEFSYQEMITHLPLC--SLPH-PK----------------------K-----VLIIGGGDGGVLREVSRHPS-----VEQIDICEIDKMVIDVSKEFFPK----VAI------G-FQ--D---PRVNVHIGD------------------GVKFLQDA----------AAKSYDVIIVDSSD-P--V---G-----P-AEGLFQ--KPFYESLARA-LR-PGGVACTQA--ESIWLHLPIIKEVVT--ISSGI-F---------------K-GSINYAWTSVPTYP---------S----GIIG--FML----CST---------EG---P----------AVN--------FS--K-----P--------IN---------PI----E---SFV------------STDESSKLVKEP----LKYYNS-QVHTAALVLPQFA-KD---TVGSLLT------------TYS*------------------------------------------------------------------------------------------------------------------------------------------------
>CHJJ_scaffold_2020808_Lejeuneaceae_sp.
-----------------------------------------------------------------------------------------------------------------------------------------MTETIAATTTIHLNGSGPTKTPMVAVGSKRCHLGEI-------------------------------IPSSHLNGSNGTAMHTNGSNGSNGANGSYSSNGSAMHSNGLNVNGSAGVKNSFSKNA-------------------------------------------------------------------GTSRCLWFEEE-----------------LED-DLRWL--------------FGVSKILHSGVSDFQDIQLVE---SR-PFGKVLLLDGKLQSAEKDEFLYHESLVHPACL--FHSN-PK----------------------S-----VFIMGGGEGSTAREALKHRS-----VKKVVMCDIDEEVVNFCRKYLPS----NAE------A-FR--S---RRLELVIDC------------------ARAELERR-----------QEQFDVIMGDLAD-P--V-DGG-----P-CYKLYT--ESFYETVLKPKLA-PGGILVTQAGPAGILSHKMVYSSIFN--TLRQV-F---------------K-YVVPYA-AHVPSYA--------------DTWG--WIM----ASD----------H---P---------------------IP--Q--------------FN-------AAET----D---FRI-------------AHRVT-G---E----LRFLDG-ATVGGLLALNKQV-RT---SIYNETH----VYT----EETAR-----------FIH---GHGTGPKHAH*--------------------------------------------------------------------------------------------------------------------
>CMEQ_scaffold_2004633_Orthotrichum_lyellii
--------------------------------------------------------------------------------------------------------------------------------------------------------MAMAEEGSRNAAELIAQDNAA--------------------------------------------------PAPSTGRANLSN----------------------IMPG-------------------------------------------------------------------------WFSEI---------------------SPMWP------G---EAHSLKVEKFLFEGKSDYQDVVVFE---SA-TYGRVLVLDGVIQLTQRDECAYQEMITHLPLC--SIPN-PK----------------------K-----VLVVGGGDGGVLREVSRHKS-----IEQIDICEIDKMVVDVAKEFFPD----VAI------G-FD--D---PRVNLRIGD------------------GVAFLNEV----------PEGTYDAIIVDSSD-P--V---G-----P-AQALFE--RPFYKSLDRA-LR-PGGVICTQA--ESLWLHMPIIKDIVA--ACSHT-F---------------K-GSINYAWTSVPTYP---------S----GVIG--FML----CSK---------AG---P----------FVN--------FR--E-----P--------CN---------PI----D---KAG-------------NDKLSAR--RP----LKFYNS-AMHAAAFSLPQFA-RE---ELEHLLT----------PPPSS*------------------------------------------------------------------------------------------------------------------------------------------------
>CMEQ_scaffold_2006301_Orthotrichum_lyellii_78
------------------------------------------------------------------------------------------------------------------------------------------------MVKDDASNGAHVNGSSTHPSPPAAAAAAA---------------------------------AAKPSSPATTITAPTVAAASVEGPKKPCL---------------------------------------------------------------------------------------------------WFAEE-----------------LEA-DLRWV--------------FGVSKILHTGVSEFQDIQLLE---SG-PFGKVLILDGKLQSAEADEYVYHESIVHPALL--YHSN-PK----------------------K-----VFIMGGGEGSTAREALRHRS-----VDEVVMCDIDAEVVNFCRKHLTV----NAE------A-FG--N---DRLELVINC------------------ARAELEKR-----------TEQFDIIIGDLAD-P--V-AGG-----P-CYQLYT--KSFYEGILKPRLK-DGGILVTQGGPAGILSHTEVYSSIYN--TLRET-F---------------K-YVVPYA-AHVPSYA--------------DTWG--WVM----ASD----------R-SIP---------------------AI--N-----P---------E---------ET----D---SRI-------------KQRID-G---E----LQFLDG-QTLSATVALNKHV-RK---SLAAERH----VYT----EETAR-----------FIH---GHGTAVKN*----------------------------------------------------------------------------------------------------------------------
>CMEQ_scaffold_2016135_Orthotrichum_lyellii_76
-----------------------------------------------------------------------------------------------------------------------------------------------------------------MVESNGAHVNGT---------------------------------SHQSPVVCAKPALA---APPESKKRCL-----------------------------------------------------------------------------------------------------WFEEE-----------------LEE-DLRWV--------------FGVSKILHTGVSEFQDIELVE---SG-PFGKVLILDGKLQSAEADEFVYHESIVHPAML--YHPN-PK----------------------N-----VFIMGGGEGSTAREALRHRC-----VEQVVMCDIDEEVVNFCRKHLTV----NAE------A-FC--S---NRLKLVINC------------------ARAELEKR-----------TEQFDIIIGDLAD-P--V-AGG-----P-CYQLYT--KSFYEVILKPRLK-EGGILVTQGGPAGILSHTEVYSSIYN--TLRQT-F---------------K-YVVPYA-AHVPSYA--------------DTWG--WIM----ASD----------Q---P---------------------IPSIS--------------AE---------ET----D---TRL-------------KQRLDRE--------LKFLDG-QTLSATMALNKHV-RK---SLAMERH----VYT----EETAR-----------FIH---GHGTALKN*----------------------------------------------------------------------------------------------------------------------
>Cpapaya|evm.TU.supercontig_126.36
------------------------------------------------------------------------------------------------------------------------------------------------------------------MGTEAVEILTG---------------------------------KDLSKIC----------SEPSQGIHGDCC---------------------------------------------------------------------------------------------------WYEET-----------------IDV-HLKWS--------------FELNSVLHKGTSEHQEIALLD---TK-HFGKVLVIDGKMQSAERDEFIYHECLIHPPLL--CHPN-PR----------------------T-----VFIMGGGEGSAAREILKHKT-----VKKIIMCDIDQEVVDFCRRYLTV----NHE------A-FC--N---EKLNLVIND------------------AKKELEKC-----------NEKFDIIVGDLAD-P--V-EGG-----P-CYQLYT--KSFYEKILKPRLN-DKGIFVTQAGPAGIFTHKEVFSSIYN--TIKHV-F---------------K-YVMAYT-AHVPSFA--------------DTWG--WVI----ASD----------Q---P---------------------FS--I-----N--------AE---------EI----D---RRI-------------EDRVC-G---E----LLYLNG-ASFLSSSIMNKTV-SL---SLLNETH----VYT----EEDAR-----------FIH---GHGLGRRD*----------------------------------------------------------------------------------------------------------------------
>Cpapaya|evm.TU.supercontig_58.122
------------------------------------------------------------------------------------------------------------------------------------------------------------MGEISCSNGNGINGKNH--------------------------------------------------TLAGYRKSC------------------------------------------------------------------------------------------------------WYEEE-----------------IEE-NLRWC--------------FALNSILHTGATQFQDIALLD---TK-PFGKALVIDGKLQSAEVDEFIYHECLVHPALI--HHPN-PK----------------------K-----VFVMGGGEGSTAREILRHKT-----VEKVVMCDIDEEVVEFCKSYLIV----NRE------A-FC--D---SRLELVIND------------------ARVELESR-----------TDGHDVIIGDLAD-P--I-EGG-----P-CYKLYT--KSFYEFTVKPRLN-HGGIFVTQAGPAGIFSHTEVFTCIYH--TLKQV-F---------------K-YVVPYS-AHIPSYA--------------DTWG--WIM----ASD----------S---P---------------------LT--A-----S--------SE---------EV----D---LRM-------------KQRIK-G---E----NRFLDG-KTFTSAATLSKAV-RK---SLDNETH----VYT----EGTAR-----------FIY---GYGKNNQG*----------------------------------------------------------------------------------------------------------------------
>CQQP_scaffold_2072908_Ochlochaete_sp.
-------------------------------------------------------------------------------------------------------------------------------------------------------------------------------------------------------------------------------MTKAESGLVKDG---------------------------------------------------------------------------------------------------WFTEL---------------------STLWP------G---QGLSLKVKEILFHEKSEYQDVCVFE---SESTFGRVLTLDGVIQVTEKDEFSYQEMITHLPLC--GMSRAPE----------------------K-----VLIVGGGDGGVAREIAKHTC-----VQHIDMAEIDKIVPEVSKKYFPA----LAK------G-FE--D---ARLHVHFGD------------------GVKFLEEC----------PEGTYDAIIVDSSD-P--V---G-----P-AEALFE--AAFFKLMYRA-LK-PGGVLSTQA--ESLWLHMDIIESLAK--ICKEI-F---------------VGGALNYAYTTIPTYP---------S----GQIG--FMV----CQK-------AEEG-----------------------------G--------------VS---------GA--------TQP-------------QRELPAG---E----CKYYHP-EMHRTSFVLPAFA-YV---RLGQHLT----------SQTMS*------------------------------------------------------------------------------------------------------------------------------------------------
>CQQP_scaffold_2076568_Ochlochaete_sp.
---------------------------------------------------------------------------------------------------------------------------------------------------------------------------------------------------------------------------M---VESGTEERSRRI---------------------------------------------------------------------------------------------------WLEED-----------------LSP-HLRWS--------------MAIKTILNAGKSEFQAYELVD---TY-SFGKLLMLDGKLQSAESDERAYHECLVQPAML--LHPN-PK----------------------T-----VFICGGGEGATAREVLKHSS-----VEKCVMVDIDEDVCNFCRDNLDV----NRA------A-FE--D---PRLELIHDD------------------ARAQLENY-----------AGSFDVIIGDLAD-A--V-FGG-----P-CYQLYT--DDFYKNVVSKKLN-AGGIFVTQSGPCGILTAGEVFSSIHS--TLKAS-F---------------P-KVVPYR-AHIPAFA--------------DTWG--WNI----AFK--------DTE---P-----D---------------LS--G-----D-------------------EM----E---KRI-------------QKKLG-G---D----LWFLDG-ETWQGVTSLPRPV-RK---IVESEQH----ILS----VDNPR-----------FIH---GSG-LQAG-K*--------------------------------------------------------------------------------------------------------------------
>Cre06.g251500.t1.2
-------------------------------------------------------------------------------------------------------------------------------------------------------------------------------------------------------------------------------MANYAKRL-------------------------------------------------------------------------------------------------------WLEED-----------------LGD-DYRWS--------------YRVSEVLFSGRSEFQEIDLVD---TP-TWGKVLLLDGKMQSTEADEQVYHELLVHPPLL--HHAC-PK----------------------R-----VYIMGGGEGATAREVLRHKT-----VEQVVMVDIDKVVTDFCSKHLER----NTQ------A-FA--D---PRLTLINDD------------------ARTQLEQA----------PDGSFDVVIGDLAD-P--L-DGG-----P-CYQLYT--QEFYRNVVLKKLA-PGGIFITQSGPAGFLSCKEVFTAIHS--TVRSV-F---------------P-VVVPYA-QHIPSFC--------------DIWG--YNMAFSDAAQ----------A---P---------------------LS--------P---------E---------EL----D---SRI-------------GARLDGV---P----LHFLDG-VTFQGLRHLNKMV-RV---ALQEEKE----VYT----VDSAR-----------FIH---GAGVKA*------------------------------------------------------------------------------------------------------------------------
>Cre12.g558450.t1.2
-------------------------------------------------------------------------------------------------------------------------------------------------------------------------MASK--------------------------------------------------PSPGSADQAIND-------------------------G-------------------------------------------------------------------------WYTEL---------------------SPMWP------G---QGLSLKVKEILYRGKSDFQDVCVFE---SE-SMGTVLLLDGVIQATDRDEFSYQEMIAHIPMC--ALERPAK----------------------K-----VLVVGGGDGGVLRELARYPD-----VEEIHMAEIDKMVPDVSKQYFPE----MAV------G-FS--D---PRVTLHICD------------------GIKYVEDS----------PEHSYDLIVVDSSD-P--V---G-----P-AEVLFE--KPFFEALHRA-VR-PGGIVCTQA--ESLWLHLDIIKALAG--MCKEV-F---------------AGGSVSYATTTIPTYP---------S----GQIG--MLV----CAK---ARTEQGEG--GS-------------------------A-----P--------LD--------PRI----P---RQA------------EPGPLPQLGVPE----LKYYSH-EVHTAAFVLPVFA-KK---GLEGCLT---------------------------FQ*----------------------------------------------------------------------------------------------------------------------------------
>Csinensis|orange1.1g016578m.g|orange1.1g017607m
----------------------------------------------------------------------------------------------------------------------------------------------------MEGGEGKGLGCQKTMDGKESNKNGS---------------------------------AGAIPSC-CLKARA---SAPELDAKCHST----------------------VVSG-------------------------------------------------------------------------WFSES-------QSTSDKTGKTMYFNNPMWP------G---EAHSLKVKEILFKGKSEYQEVLVFE---SL-AYGKVLVLDGIVQLTEKDECAYQEMIAHLPLC--SIPS-PK----------------------T-----VLVVGGGDGGVLREISRHDS-----VELIDICEIDKMVIDVSKKYFPE----LAV------G-FE--D---PRVRLHIGD------------------AVEFLRQV----------PRGKYDAIIVDSSD-P--V---G-----P-AQELVE--KPFFDTIAKA-LR-PGGVLCNMA--ESMWLHTHLIEDMIS--ICRET-F---------------K-GSVHYAWASVPTYP---------S----GIIG--FLI----CST---------EG---P----------HVD--------FV--N-----P--------IN---------PI----E---KLE-------------GADKHKR---E----LRFYNS-EIHSAAFALPAFL-KREVSVLGDSPTPSQRICVS*-------------------------------------------------------------------------------------------------------------------------------------------------------
>Csinensis|orange1.1g019187m.g
-----------------------------------------------------------------------------------------------------------------------------------------------------MAETGSAAATDLPLKRPRDDGEKE---------------------------------ANNNNNG--SVLME---MDSNKQPDCISS----------------------VIPG-------------------------------------------------------------------------WFSEI---------------------SPMWP------G---EAHSLKVEKILFQGKSDYQNVMVFQ---SS-TYGKVLILDGVIQLTERDECAYQEMITHLPLC--SIPN-PK----------------------K-----VLVIGGGDGGVLREVSRHSS-----VEKIDICEIDKMVVDVSKQFFPD----VAV------G-FE--D---PRVTLHIGD------------------GVAFLKAV----------PEGTYDAVIVDSSD-P--I---G-----P-AQELFE--KPFFESVAKA-LR-PGGVVSTQA--ESIWLHMHIIEDIVA--NCRQI-F---------------K-GSVNYAWTTVPTYP---------S----GVIG--FML----CST---------EG---P--------P--VD--------FK--H-----P--------VN---------PI----D---ADD-----------SNCNSSK-G---P----LKFYNS-EIHTAAFCLPTFA-KK---VIESKNE----KI*---------------------------------------------------------------------------------------------------------------------------------------------------------
>Csinensis|orange1.1g019550m.g
-------------------------------------------------------------------------------------------------------------------------------------------------------MGTEAVEILFENGFSKVCNDTD--------------------------------------------------PNINGNLQDCC----------------------------------------------------------------------------------------------------WFEEV-----------------IDD-DLKWS--------------FALNRVLHKGTSEFQDIALLD---TK-RFGKVLVIDGKMQSAEVDEFIYHECLIHPPLL--CHQN-PK----------------------T-----VFIMGGGEGSAAREALKHKS-----LEKVVMCDIDQEVVDFCRRFLTV----NQE------A-FC--S---KKLNLVVND------------------AKAELEKR-----------NEKFDVIFGDLAD-P--V-EGG-----P-CYQLYT--KSFYERILKPKLN-DNGIFVTQAGPAGIFTHKEVFSSIYN--TIKQV-F---------------K-HVVAYT-AHVPSFA--------------DTWG--WVM----ASD----------Q---P---------------------FS--I-----N--------AE---------EI----D---NRI-------------KSRINAE--------LLYLNG-ASFLSSTTMNKAV-YL---SLLNETH----VYT----EEDAR-----------FIH---GHGVAYNNSH*--------------------------------------------------------------------------------------------------------------------
>Csinensis|orange1.1g019699m.g
--------------------------------------------------------------------------------------------------------------------------------------------------------------MGEISCSNGISQANG------------------------------------------ADAKN---VALTGYRKSC-----------------------------------------------------------------------------------------------------WYEEE-----------------IEE-NLRWS--------------FALNSILHTGETRYQDIALLD---TK-PFGKALVIDGKLQSAEVDEFIYHESLVHPALL--HHPN-PK----------------------T-----IFIMGGGEGSTAREILRHKT-----VEKVVMCDIDEEVVEFCKSYLVV----NKE------A-FS--D---PRLELVIND------------------ARAELESR-----------KESYDVIIGDLAD-P--I-EGG-----P-CYKLYT--KSFYEFVVKPRLN-PEGIFVTQAGPAGIFSHTEVFSCIYN--TLRQV-F---------------K------------------------------------------CGY------------------------------------------------------------------------N----------------------------------LTLL*--------------------------------------------------------------------------------------------------------------------------------------------------------------------------------------------
>Csinensis|orange1.1g037807m.g
----------------------------------------------------------------------------------------------------------------------------------------------------------------------------------------------------------------------------------------------------------------------------------------------------------------------------------------------MYLAG------------------------------------QAHFLEVEKIIFQGKSEYQNMMVFQ---SS-SYGKVFVLDGALQLTEKDECAYQEMITHLPLC--SIPN-PK----------------------K-----VLLIGGGDGGILREISRHAS-----VEQIHICEIDTMLINVYKEYFPE----IAI------G-YE--D---SRVILHVCD------------------GSEYLKTV----------QSGTFDAIIIDAFD-P--I---R-----P-GHDLFE--GPFFELVAKA-LR-PGGAMCIQA--ESLWFQQFSVQHLID--DCHRI-F---------------K-GSASYAWTTVPTYP---------S----GVIG--FML----CST-------ESEG---P----------SVD--------FI--H-----P--------IN---------PI----D---PDQ-------------IFGVAKG---P----LKFYNSAEVHAAAFCLPTFA-KKPAHSHIPSTR-----------WPEAN---------------------ICQC*----------------------------------------------------------------------------------------------------------------------
>Dcarota|DCAR_000821
---------------------------------------------------------------------------------------------------------------------------------------------------------------MGEAVEFLQYSNGF---------------------------------GHHKIDE--GLLMI---NREAYPQISHDS---------------------------------------------------------------------------------------------------WFEEE-----------------IDV-DLKWS--------------FALNSVLHRGRSEYQDIVLLD---TK-RFGKVLVLDGKMQSAEIDEFIYHECLIHPSLL--CHPN-PK----------------------S-----MFIMGGGEGSAVREALKHKS-----IEKVVMCDIDEEVVDFCRRHLSA----NKE------A-FS--S---SKLDLVIND------------------AKVGLEER-----------KEKFDIIVGDLAD-P--V-EGG-----P-CYQLYT--KSFYEKILKPKLN-HSGIFVTQAGPAGVFTHKEVFSSIYN--TIRQV-F---------------K-YVVVYT-AHVPSFA--------------DTWG--WVM----ASD----------Q---P------------I--------CV--D-----A--------VN----------I----D---KKI-------------QERID-G---E----LDYLNG-AMLYSSTILNKTI-SQ---TLKNETH----VYT----EENAR-----------FIP---GHG-VAYR-I*--------------------------------------------------------------------------------------------------------------------
>Dcarota|DCAR_010607
----------------------------------------------------------------------------------------------------------------------------------------------------MAGDVGSGMEDQTLMDVKGRNGTST----------------------------------DQDEAKIPSCCVKARSLDPEFEANCHST----------------------VVSG-------------------------------------------------------------------------WFSEP-------QSSADKSGKCIYFNNPMWP------G---EAHSLKMDKILYKEKSKYQEILVFE---SA-AYGKVLVLDGILQLTEKDECAYQEMIAHLPLC--SIAS-PK----------------------N-----VLVVGGGDGGVLREICRHSS-----VEHIDICEIDNMVIDVSKRFFPE----LAI------G-YE--D---SRVQLHVGD------------------GAEFLRNA----------PEGKYDAIIVDGSD-P--I---G-----P-AQELVE--QPFFESAARA-LR-PGGVFCSMA--ESMWLHTHLIDDMYG--ACQNA-F---------------K-GSVHYAWTSVPTYP---------S----GVIG--FLI----CST---------EG---P----------PVD--------FR--N-----P--------AN---------PI----E-------------------MLDGALNYRRE----LRFYNS-EVHTAAFALPSFV-KR---EVSRL*-----------------------------------------------------------------------------------------------------------------------------------------------------------------
>Dcarota|DCAR_024141
----------------------------------------------------------------------------------------------------------------------------------------------------------------------MAAGEGN-------------------------------------GVV--PVEME---GANSNNNNNISS----------------------VISG-------------------------------------------------------------------------WFSEI---------------------SPMWP------G---EAHSLKVEEILFQGKSEYQNVMVFQ---SA-TYGKVLVLDGVIQLTERDECAYQEMITHLPLC--SISN-PK----------------------K-----VLVIGGGDGGVLREVSRHST-----VEQIDICEIDKMVVDVSKQFFPE----VAI------G-YE--D---PRVKLHIGDGVAFMYLTINAFRLLALAGVAFLKAV----------PEGTYDAVIVDSSD-P--I---G-----P-AQELFE--KPFFKSVSKA-LR-PGGVVCTQA--ESIWLHMHIIEDIVA--NCRQI-F---------------K-GSVNYAWTTVPTYP---------S----GVIG--FML----CST---------DG---A--------P--VD--------FK--H-----P--------VS---------QI----D---ESA-------------------R---P----LKFYNP-EIHTAAFCLPTFA-KK---VIEAKSV*---------------------------------------------------------------------------------------------------------------------------------------------------------------
>Dcarota|DCAR_027204
------------------------------------------------------------------------------------------------------------------------------------------------------------MGDISYSNNSGISNGNS--------------------------------------------------HANAMLVQRKGC---------------------------------------------------------------------------------------------------WYEEE-----------------IEE-NLRWC--------------FALNSILHTGASQYQDIQLLD---TK-PFGKALVIDGKLQSAETDEFIYHECLVHPALV--HHQN-PT----------------------N-----VFIMGGGEGSTARELLRHNT-----IAKVVMCDIDQEVVDFCKSYLVV----NRV------A-FC--D---PRLELVIND------------------ARAELERR-----------EESYDVIIGDLAD-P--I-EGG-----P-CYKLYT--KTFYELTVKPRLN-KGGIFVTQAGPAGVFSHAEVFSCIYN--TLRQV-F---------------K-YVVPYS-AHIPSYA--------------DIWG--WVM----ASD----------T---P---------------------FV--L-----G--------AD---------DL----D---LRM-------------KHRIK-G---E----NRYLDG-KTFTSASTFCKAV-RK---SLDNETH----VYT----EGTAR-----------FIY---GHGHGHNSATKHN*-----------------------------------------------------------------------------------------------------------------
>Dcarota|DCAR_027208
------------------------------------------------------------------------------------------------------------------------------------------------------MGDISYSNNSGISNGNGCTNGNG--------------------------------------------------HANGMLVQRKSC---------------------------------------------------------------------------------------------------WYEEE-----------------IEE-NLRWC--------------FALNSILHTGASQYQDIQLLD---TK-PFGKALVIDGKLQSAEIDEFIYHESLVHPALL--HHQN-PT----------------------N-----VFIMGGGEGSTARELLRHNT-----IEKVVMCDIDQEVVDFCKSYLVV----NRV------A-FC--D---PRLELIIND------------------ARAELERR-----------EESYDVIIGDLAD-P--I-EGG-----P-CYQLYT--KTFYELTVKPRLN-KGGIFVTQAGPAGVFSHAEVFSCIYN--TLRQV-F---------------K-YVVPYS-AHIPSYA--------------DIWG--WVM----ASD----------T---P---------------------FV--L-----G--------AD---------DL----D---LRM-------------KLRIK-G---E----NRYLDG-KTFTSASTLSKAV-RK---SLDNETH----VYT----EGTAR-----------FIY---GHGHNSAT-KHN*------------------------------------------------------------------------------------------------------------------
>Dcarota|DCAR_031094
----------------------------------------------------------------------------------------------------------------------------------------------------------MAEESIVISVPKDMPVKRP---------------------------------RDGEEEIVVLQEVK---TNEKDAEYSISS----------------------VIPG-------------------------------------------------------------------------WFSEI---------------------SPMWP------G---EAHSLKVEKVLFQGKSDYQNVMVFQ---------------------------------------------------------------------------VLVIGGGDGGVLREVARHST-----VEQIDICEIDKMVVDVSKQYFPD----VAV------G-YE--D---PRVNLHIGD------------------GVAFLKAV----------PEGTYDAVIVDSSD-P--I---G-----P-AQELFE--KPFFESVAKA-LR-PGGVVCTQA--ESIWLHMHIIEDIVA--NCRHI-F---------------K-GSVNYAWTTVPTYP---------S----GVIG--FML----CST---------EG---T----------PVD--------FK--H-----P--------VN---------PI----D---DSK-------------SDR-------P----LKFYNS-EIHEAAFCLPSFA-KK---VIEGIAK*---------------------------------------------------------------------------------------------------------------------------------------------------------------
>DCDT_scaffold_2000355_Cheilanthes_arizonica
------------------------------------------------------------------------------------------------------------------MRALSCSSPPLSPRGGEPSCSVTQFAPKKWAFPRSPSSSVFASSSSSARSSAFASSSRP--------------------YSGFPSSVPSAELGCFSSST--ARMEG---VKPGTGRANISS----------------------VIPG-------------------------------------------------------------------------WFSEI---------------------SPMWP------G---EAHSLEVKEILFEGKSDYQDVLVFQ---SA-TYGKVLVLDGVIQVTERDECAYQEMITHLPLC--SIPN-PQ----------------------K-----VLVIGGGDGGVLREVARHKS-----VKQIDICEIDQMVIDVAKKFFPD----IAV------G-FA--D---PRVKLFVGD------------------GAVFLKDV----------SDGFYDAVIVDSSD-P--V---G-----P-AQQLFE--TPFFESLARV-LR-PGGVVSTQA--ESVWLHMHIIKDIFS--SCKKT-F---------------K-GSVNYAWTSVPTYP---------S----GVIG--FML----CST---------EG---S--------A--VN--------FR--Q-----P--------VN---------PI----E---KLE-------------SDINI-G---P----LKFYNS-EMHTAAFCLPQFA-RQ---ALDT*------------------------------------------------------------------------------------------------------------------------------------------------------------------
>DCDT_scaffold_2005574_Cheilanthes_arizonica
--------------------------------------------------------------------------------------------------------------------------------------------------------------------------------------------------------------------------------------------------------------------------------------------------------------------------------------------------------------------------MWQ------G---EAHSLKVDKILFEEKSDYQDVLVFQ---SE-AYGKVLVLDGVTQLTERDECAYQEMITHLPLC--SIHN-PK----------------------K-----VLVIGGGDGGVLREISRHDS-----VEQIDICEIDKMVVDVSKKFFPH----LAV------G-YE--D---PRVKLFIGD------------------GFTFLRDA----------AEGFYDAVIVDSSD-P--I---G-----P-AQQLFE--KPFFDLVARA-LR-PGGVLCTQT--ESLWLHMHTIQDLVS--VCKQT-F---------------K-GSINYAWTSVPTYP---------S----GVIG--LML----CST---------EG---P----------AVN--------FR--Q-----P--------VN---------PI----E---QQK-------------SSR-------P----LKYYNS-EMHTAAFCLPQFV-RM---LLEPVIF------------SGA*------------------------------------------------------------------------------------------------------------------------------------------------
>DCDT_scaffold_2009817_Cheilanthes_arizonica
-----------------------------------------------------------------------------------------------------------------MSPSMAETACYPSNALPPSRDPFSNATFVNGNLIASYTAAANGGVNGGSATKHLSASNGILTSYSNGALPAVTPPNTVPNLQGVVAAPHIFSNGSSFSNG-NSVAKG---PINASALINGSSNNSTITGSNKASSMSNCNGQASQSNG-------------------------------------------------------ISPCTAQAEVTAPQRPSLWFEED-----------------LGE-SLRWS--------------FGLKRILHTGVSKYQDIALLD---TE-PFGKVLTLDGRMQSAQIDEWVYHECLVHPALL--LHQG-PR----------------------N-----IFIAGGGEGSTARECLLHKS-----VRKVVMCDIDEEVVKFCSAHLTI----NKE------A-FQ--S---SKLELVIND------------------AKAELKCR-----------EDRFDVIIGDLAD-P--L-EWG-----P-CYTLYC--QGFYQNVVKPRMN-PNGIFVTQAGPAGVLSHREVFTSIYN--TLKSV-F---------------N-YVVAYT-AHVPSYC--------------DVWG--WVV----ASD----------Q---P---------------------LM--S-----Q--------MS-------SEEL----D---CRI-------------AQRIKGG---Q----LRYLDG-PTLYASTILNRTV-RE---SLENEKH----VYT----EESAR-----------YVY---GQGRITNSGTH*-------------------------------------------------------------------------------------------------------------------
>DCDT_scaffold_2075527_Cheilanthes_arizonica
-----------------------------------------------------------------------------------------------------------MAETACLTPYPSKSMPPSTRDLPPFPNPSPLHSYVSNSLSSYTFNGGGGAPAPTVPKPSPLQPPSN---------------------------------GVQAVAC--SNGIT---PSHNVIQGVPPSV---------------------FVNG------------------THSHNANSAKAAADGNTNYECKAVTSIFNSNEQGAHTNGGLACQAEVASPRRPSLWYEEE-----------------IDE-NLRWS--------------FGLTSILFTGCSRFQEIALLD---TE-PFGKVLTLDRKMQSAEKDEWVYHECLVHPPLL--LHSC-PK----------------------S-----IYIMGGGEGSTAREALRHRS-----VRKVVMCDIDEEVVKFCRSHLTC----NAE------A-FQ--S---KRLELVIDD------------------AKTNLESR-----------EERFDIIIGDLAD-P--L-EWG-----P-CYLLYT--KGFYESIVKPKLN-PGGILVTQAGPAGILSHKEVFTSIYN--TLRQV-F---------------T-YVVAYS-AHVPSYA--------------DTWG--WVM----ASD----------H---P---------------------FT--H-----I---SAIDELD--------CKI----K---QRI-----------------K-G---E----LRYLDG-ATLHASTILNKTV-RE---SLAKESH----VYT----EDSAR-----------FLY---GHG-RSPS-AH*-------------------------------------------------------------------------------------------------------------------
>DRGY_scaffold_2036740_Chaetosphaeridium_globosum
--------------------------------------------------------------------------------------------------------------------------------------------------------------------------MDT------------------------------------------------------------------------------------VMKG-------------------------------------------------------------------------WFSEL---------------------GAMWP------G---QCFSLKVDKVLFKGKSLYQDVMVFQ---SE-VYGKVLVLDGAIQLTERDECSYQEMITHIPLC--SIPD-PK----------------------R-----VLVVGGGDGGVLREVSRHAG-----IEEITICEIDQMVIDVAKEFFPS----VSI------G-FQ--D---PRVKVVVGD------------------AVEYIKHV----------EPGTLDAIIVDSSD-P--I---G-----P-AQQLFE--EPFYQSLAKA-LR-PGGVVTTQA--ESLWLHLPVIKDIAA--ACKKV-F---------------G-GSVQYATISVPTYP---------S----GNIG--FMV----CST---------AG---P----------KVD--------FK--T-----P--------VR---------TV----V---ETD-------------NPKLALP---P----LKFYNS-AIHKAAFCLPTFA-EE---ALASSLT--------------P*------------------------------------------------------------------------------------------------------------------------------------------------
>DXNY_scaffold_2042443_Microthamnion_kuetzigianum
-----------------------------------------------------------------------------------------------------------------------------------------------MWRRLLSFKPLTLKDRVLHRVFKEATGKRN---------------------------------PKFSRRP--FSAMS---YATEVLPDSTKRL--------------------------------------------------------------------------------------------------WLEEE-----------------IQE-DLKWC--------------MSVTEVLHSTTSEFQAIELIS---SG-PFGKVLLLDGKVQSAEADEFVYHELLVHPAML--LHPN-PK----------------------T-----VFICGGGEGATAREALRHKS-----VEKVVMVDIDKVVCDFCREHLAA----NKE------A-YA--D---PRLEVIYED------------------ARAELEKY-----------DGKFDVIIADLAD-P--V-FGG-----P-CYQLYT--QDFYEKIVKEKLN-PDGIFVTQSGPAGVLSCTEVFTPIYN--TLKSV-F---------------P-ATVPYS-AHIPSYC--------------DAWG--WNMSFQNADA----------T---T---------------------SV--S-----P------------------EEI----D---ALL-------------AKRIN-G---E----TRYLDG-ATLRSAVSLNKPV-RK---AIAEEAH----LYT----VDEPR-----------FIH---GAG-MKTI-V*--------------------------------------------------------------------------------------------------------------------
>EEMJ_scaffold_2007594_Thuidium_delicatulum
---------------------------------------------------------------------------------------------------------------------------------------LSRACLKLESVGVAAIAMAMAEGESRNAAELIAQDNAA--------------------------------------------------PAPSTARANLSN----------------------IIPG-------------------------------------------------------------------------WFSEI---------------------SPMWP------G---EAHSLKVEKFLFEGKSDYQDVVVFE---SA-TYGRVLVLDGVIQLTQRDECAYQEMITHLPLC--SIPN-PK----------------------K-----VLVVGGGDGGVLREVARHKS-----IEQIDICEIDKMVVDVAKEFFPD----VAI------G-FD--D---PRVNLHIGD------------------GVAFLREV----------PEGTYDAIVVDSSD-P--V---G-----P-AQALFE--RPFYKSLDRA-LR-PGGVICTQA--ESLWLHMPIIKDIVA--ACGHT-F---------------K-GSINYAWTSVPTYP---------S----GVIG--FML----CSS---------AG---P----------FVN--------FR--E-----P--------CN---------PI----D---KAA-------------DTKLSAR--RP----LKFYNS-AMHAAAFSLPQFA-KE---ELEHLLT----------PPPSS*------------------------------------------------------------------------------------------------------------------------------------------------
>EEMJ_scaffold_2039990_Thuidium_delicatulum_85
--------------------------------------------------------------------------------------------------------------------------------------------------------MVKGESNGVHVVNGTLHQSSS----------------------------------AAAKPT-LTVTRT---PSPPPSTVEEPR-----------------------------------------------------------------------------------------------KRCLWFEEE-----------------LEE-DLRWV--------------FGVSKILHTGVSEYQNIELLE---SG-PFGKVLILDGKLQSAEADEFVYHESIVHPALL--YHSN-PK----------------------N-----VFIMGGGEGSTAREALKHRS-----VEEVVMCDIDEEVVNFCRKHLTV----NAE------A-FR--S---DRLELVINC------------------ARAELEKR-----------TEQFDIIIGDLAD-P--V-AGG-----P-CYQLYT--KSFYETILKPRLK-EGGILVTQGGPAGILSHSEVYSSIYN--TLRET-F---------------K-HVVPYA-AHVPSFA--------------DTWG--WVM----ASD---------AP-LSP---------------------LR--------P---------E---------ET----D---SRI-------------NQRID-G---E----LKFLDG-QTLSASIALNKHV-RK------RYT*----------------------------------------------------------------------------------------------------------------------------------------------------------------
>EFMS_scaffold_2080012_Torreya_taxifolia
--------------------------------------------------------------------------------------------------------------------------------------------MGEAAPTNGFSLNGNGNGHCNGYSNGNGHCNGY---------------------------------SNGSSAA-ISTSAGGAVTHLLFSNGNGNGHGHGHNHNHHNNNHNHNCKAPSFGDG--------------------------------------------------------------------RRRCFWYEEE-----------------IED-DLRWC--------------FALNRILHTGVSEYQDIALID---TR-PFGKALVIDGKMQSTEVDEFIYHESLVHPALV--YHSN-PN----------------------S-----AFIMGGGEGSTAREILRHNS-----IKKVVMCDIDKEVVDFCKKYLVV----NRE------A-FS--N---SRLELVIND------------------ARAELESR-----------QERFDVIIGDLAD-P--V-EGG-----P-CYQLYT--KSFYDKVIKPKLN-PQGIFVTQAGPAGVLTHTQVFSSIYN--TLRQV-F---------------K-HVMPYS-AHVPSFA--------------DTWG--WVM----ASD----------H---P---------------------LS--M-----E--------AE---------EI----D---GRI-------------QNRVK-G---E----LQFLDG-QSFVVAATLNKSV-RK---SLSKETH----VYT----EETAR-----------FIH---GHGKASHQ*----------------------------------------------------------------------------------------------------------------------
>EFMS_scaffold_2080837_Torreya_taxifolia
--------------------------------------------------------------------------------------------------------------------------------------------------MADNSVNNGASSAVLDLPLKRPRPERE---------------------------------INKNSAA-QSLQET---AMDDGAAGSYPS----------------------VISG-------------------------------------------------------------------------WFAEM---------------------SPMWP------G---EAHSLKVEKVLFRGKSDFQDVMVFE---SA-TYGKVLVLDGVIQLTERDECAYQEMITHLPLC--SIPN-PK----------------------K-----VLVIGGGDGGVLREVSRHNS-----VEQIDICEIDGMVVNVSKEFFPN----IAV------G-FQ--D---PRVRLNIGD------------------GVAFLRDC----------PEGTYDAVIVDSSD-P--I---G-----P-AEELFK--KPFFESVARA-LR-PGGVVCTQA--ESMWLHMPIIEDIVN--VCRQT-F---------------K-GAVNYAWTTVPTYP---------S----GMIG--FML----CST---------DG---P----------PVD--------FQ--H-----P--------IN---------FI----E---KQE-------------CNVKSLG---P----LRFYNS-EMHAASFCLPAFA-RR---AIGSKVQ-----------PSSS*------------------------------------------------------------------------------------------------------------------------------------------------
>EGLZ_scaffold_2001732_Prumnopitys_andina
-----------------------------------------------------------------------------------------------------------------------------------------------------MAEDLDFNANLLRPEEEESGNGNN---------------------------------SVGQIPL-CCEKAR---GGESLEGGCIST----------------------VIPG-------------------------------------------------------------------------WFSEV----KNSLKIPEGSTKVQYFNNPMWP------G---EAHSIKLEKILFQGRSQYQDVMVFQ---SS-AYGKVLVLDGVVQLSEKDECAYQEMIAHLPLC--SIPC-PK----------------------K-----VLVVGGGDGGVLREISRHNS-----VEQIDICEIDKMVIDVSKQFFPE----LGV------G-YE--D---PRVRLHVGD------------------GAAFLRGC----------PAGEYDAIIVDSSD-P--V---G-----P-AQELFE--QPFYETVSRA-LR-PGGVVITQA--ESLWLHMHVIQDIIL--ACRQA-F---------------K-GSVNYAWTSVPTYP---------S----GAIG--FMI----CST---------EG---P----------SVD--------FK--N-----P--------IN---------PI----E---KQE-------------TAKKLRG---P----LKFYNS-EMHASAFALPAFV-RK---ALDTLLR------------PSS*------------------------------------------------------------------------------------------------------------------------------------------------
>EGLZ_scaffold_2010414_Prumnopitys_andina
---------------------------------------------------------------------------------------------------------------------------------------------MADSSDNHNNGVPASSLLDLPIKSRGTDGEAT---------------------------------HKERKVG--HSSAM---EDGAMANGTYPS----------------------VIPG-------------------------------------------------------------------------WFAEM---------------------SPMWP------G---EAHSLKVEKVLFQGKSDYQDVMVFE---SS-TYGKVLVLDGVIQLTERDECAYQEMITHLPLC--SVQN-PK----------------------K-----VLVIGGGDGGVLREVSRHNS-----VEQIDICEIDKMVVDVAKKYFPK----LAI------G-FE--D---PRVKLHIGD------------------GVAFLNGC----------LEGTYDAVIVDSSD-P--I---G-----P-AEELFK--KPFFESVARA-LR-PGGVVCTQA--ESIWLHMHIIEDIVD--VCRQT-F---------------K-GSVNYAWTTVPTYP---------S----GVIG--FML----CST---------EG---P--------A--VD--------FQ--H-----P--------IN---------PI----D---KQE------------SNIKSL-G---P----LKFYNS-EIHTASFCLPAFA-RK---AIGSKVQ-----------TILS*------------------------------------------------------------------------------------------------------------------------------------------------
>FAJB_scaffold_2053537_Paraphymatoceros_hallii
--------------------------------------------------------------------------------------------------------------------------------------------------------------------------------------------------------------MDKIMNG-------------------------------------------------------------------------------------------------------------------------WFSEA--------------------GHPMWP------G---QAMSLEVEEVLLQQKSDYQDVLVFK---SK-TYGNVLVLDGVIQVTERDEFSYQEMLAHLALC--AHPN-PE----------------------R-----VVVIGGGDGGVLREIAKHDS-----VKEITICEIDKVVIEAAKKYLPG----TSI------G-YT--D---PRVTVHVGD------------------GVKFMDEH-----------EKHFDVIIVDSSD-P--V---G-----P-AEFLFE--KPFYQSIKKA-LR-EGGIAATQA--ECLWLHMDIIKRLMI--QSKEM-F-----------------KHAEYAFTTIPTYP---------C----GQIG--FAI----LSE--------RDQ--SP----------------------K--E-----P--------VR---------TL----P---ADK----------------------------LRYYNE-HVHRASFVLPEFA-RK---ELEQ*------------------------------------------------------------------------------------------------------------------------------------------------------------------
>FAJB_scaffold_2055018_Paraphymatoceros_hallii
-------------------------------------------------------------------------------------------------------------------MTSRLPPFTTPVTTRSGLLSAAPCSAAESKHPPVKSTLAAVCLPPDAPRPAPLPSSSGCNPGPRGRGMAVAAENGEVQPEQQEREQIEQQQVEEENAG-LEIGGRFGDSRPSTARANLST----------------------IMPG-------------------------------------------------------------------------WFSEV---------------------SAMWP------G---EAHSFKVEKFLYEGTSEYQDVVVFE---SA-TYGRVLVLDGVIQLTQRDECAYQEMIAHLPLA--SIPN-PR----------------------K-----VLVVGGGDGGVLREVSRHAS-----IVQIDLCEIDKMVVEVAKAYFPE----VAV------G-FN--D---PRVNVHIGD------------------GVAFLNNT----------AAGTYDCIIVDSSD-P--V---G-----P-AQQLFE--KPFYESLARA-LR-PGGVICTQA--ESLWLHMHIIEDIVA--TCRQI-F-----------------KTVSYAWTSVPSYP---------S----GVIG--FLL----CAT---------EG---P----------EVN--------FR--Q-----P--------VN-------FFDE----DGIAERD----------TTDKADAKSVAHTP----LKFYNQ-EMHSAAFRLPQFALRR----LASLLV----------PAEST*------------------------------------------------------------------------------------------------------------------------------------------------
>FAJB_scaffold_2055519_Paraphymatoceros_hallii_66
--------------------------------------------------------------------------------------------------------------------------------------------------------MGEAMDLEVVAHQNGAKPRAN--------------------GSVVANSNGSLANGGSAANV--STNGA---LDAPRKTGELRR---------------------------------------------------------------------------------------------------WFEEE-----------------LED-DLVWK--------------FGVSKVLYTGVSKFQSIELIE---SG-PFGKVLLLDGKLQSSEVDEFVYHESLVHPALL--YHRN-PK----------------------N-----VFIMGGGEGSTAREALRHKS-----VKQVVMCDIDEEVVDFCRDHLSA----NAE------A-FT--S---SRLELVINC------------------ARAELENR-----------EEKYDVIVGDLAD-P--V-DGG-----P-CYQLYT--QSFYEQCLKPRLN-AEGIFVTQAGPAGIYTHRQVYSSIYN--TLRRV-F---------------K-YVVPYA-AHIPSYA--------------DTWG--WIM----ASD----------H---P-------LP--AV--------TV--E-----E--------TD--------KRI----Q---HRI-------------------GS--E----LRFLDG-LTLSAIMSLNKEV-RR---TLREETH----VYT----EKTAR-----------FIH---GHG-VNS*-----------------------------------------------------------------------------------------------------------------------
>FFGR_scaffold_2007435_Netrium_digitus
--------------------------------------------------------------------------------------------------------------------------------------------------------------------------------------------------------------MNGVAHA--ESEKT---FNRSSRRL-------------------------------------------------------------------------------------------------------WFEEE-----------------LEE-DLRWV--------------FGISSILGRAVSEFQDIELVE---SG-PFGKVLILDGKLQSAEADEFVYHECLVHPALL--YHPN-PK----------------------R-----VFIMGGGEGSTAREILRHRS-----IDTVVMCDIDKEVVDFCKKHLTA----NRN------T-FN--D---GRLQLIIND------------------ARAELAKE----------EQEGYDVIVGDLAD-P--V-DGG-----P-CYRLYT--RSFYSDVLKPRLK-PGGILVTQAGPAGILSATEVYTPIYN--TLCQV-F---------------K-YVIPYA-AHVPSYA--------------DTWG--WIM----ASD----------A---P---------------------FP--E-----S------RGAE---------DA----E---ARI-------------RERLD-S---E----LQFLDG-ETLRAVMTLNKLR-RE--------RT----VYT----EDSPL-----------FIH---GHG-TQMS-HQTNVS*---------------------------------------------------------------------------------------------------------------
>FMWZ_scaffold_2005121_Dacrycarpus_compactus
-------------------------------------------------------------------------------------------------------------------------------------------MGEVTAVSMANGHGINGHGNGHIGCNGYSNGNGH---------------ALIRQNNSAARSPISNGIGAHDVPL-LSSNGVSAHRTPQVTNPQRTA----------------------TCFG------------------------------------------------------------------DGRRRCFWYEEE-----------------IED-DLRWC--------------FALNRILHTGVSDYQDIALLD---TR-PFGKALVIDGKLQSTEVDEFIYHESLVHPALV--YHFN-PR----------------------S-----AFIMGGGEGSTAREILRHKS-----IKKVVMCDIDQEVVDFCRKYLVA----NRE------A-FS--N---SRLELVIND------------------ARAELESR-----------EERFDVIIGDLAD-P--V-EGG-----P-CYQLYT--KCFYELVIKPRLN-PQGIFVTQAGPAGVLTHTQVFSSIYN--TLRQV-F---------------K-YVVAYS-AHVPSFA--------------DTWG--WVM----ASD----------H---P---------------------LT--L-----K--------AQ---------EI----D---NRI-------------KDRVK-G---E----LQFLDG-QTFVVAATLNKTV-RK---SLATETH----IYT----EETAR-----------FIH---GHGKASQL*----------------------------------------------------------------------------------------------------------------------
>FMWZ_scaffold_2008004_Dacrycarpus_compactus
----------------------------------------------------------------------------------------------------------------------------------------------MADSSDNLNNGMAASSSLDLPIKRHRTNGGG---------------------------------TSEETKV-GHSSAM---ADRAMANGSYPS----------------------VIPG-------------------------------------------------------------------------WFAEM---------------------SPMWP------G---EAHSLKVEKVLFRGKSDYQDVMVFE---SS-TYGKVLVLDGVIQLTERDECAYQEMITHLPLC--SVQN-PK----------------------K-----VLVIGGGDGGVLREVSRHNS-----VEQIDICEIDKMVVDVAKEYFPK----LAI------G-FE--D---SRVNLYIGD------------------GVAFLNGC----------PEGTYDAVIVDSSD-P--I---G-----P-AEELFK--KPFFESVARA-LR-PGGVVCTQA--ESIWLHMHIIEDIVE--VCRQT-F---------------K-GSVNYAWTTVPTYP---------S----GVIG--FML----CST---------GG---P----------AVD--------FQ--H-----P--------IN---------PI----D---KKE-------------SNVKSLG---P----LKFYNS-EIHTASFCLPAFA-RR---AIGSKVQ-----------TITS*------------------------------------------------------------------------------------------------------------------------------------------------
>FMWZ_scaffold_2012807_Dacrycarpus_compactus
------------------------------------------------------------------------------------------------------------------------------------------------------MADNKEEMSNGVVLDRPIKRIRP---------------------------------EEEIIQQ--STMAN---LDGAVLDESYPS----------------------VIPG-------------------------------------------------------------------------WFAEM---------------------SPMWP------G---EAHSLKCEKVLFRGKSDYQDVMVFQ---SS-TYGKVLVLDGVIQLTERDECAYQEMITHLPLC--SVPS-PK----------------------K-----VLVIGGGDGGVIREVSRHNS-----VEQIDICEIDRMVVDVAREFFPN----LAI------G-FE--D---PRVKLHIGD------------------GVAFLKEC----------AEGTYDVVIVDSSD-P--I---G-----P-AEELFK--RPFFESVAKV-LR-PGGVVCTQA--ESIWLHMHIIEDIVT--VCRQT-F---------------K-GSINYAWTSVPTYP---------S----GVIG--FML----CST---------DG---P----------EVD--------FQ--H-----P--------SN---------PI----D---KQE-------------SNVKSLG---P----LKFYNA-EMHKAAFCLPAFA-RR---TIGPKVQ-----------PSSS*------------------------------------------------------------------------------------------------------------------------------------------------
>FPCO_scaffold_2025890_Interfilum_paradoxum
----------------------------------------------------------------------------------------------------------------------------------------------------------MAEPQAESVKGTTKEAIKD--------------------------------------------------EQQGTARANMDR----------------------TLQG-------------------------------------------------------------------------WYSEL---------------------SPMWP------G---QALSLKMDKILFESRSDFQDVVVFE---SS-TWGRVLVLDGVIQLTQRDEAAYQEMIAHLPLC--SIDP-PK----------------------K-----VLVVGGGDGGVLREVSRHAS-----LEQIDIVEIDGMVIDVAKKFFPE----VAV------G-YE--D---PRVNVHVAD------------------GVKFLQDT----------PAGTYDAIIVDSSD-P--I---G-----P-AQQLFE--RPFFESMAKA-LR-PGGVCCTQA--ESIWLHLPIIKEIAE--ACRHT-F---------------KGGSVQYAYTSVPTYP---------S----GVIG--FML----CST---------AG---P----------TVN--------FK--H-----P--------KH---------AI----G---DSA-------------NLNKNLQ---P----LKFYTE-KLHTAAFELPKFA-LE---ALKDSLT-------------SI*------------------------------------------------------------------------------------------------------------------------------------------------
>FPCO_scaffold_2026705_Interfilum_paradoxum
--------------------------------------------------------------------------------------------------------------------------------------------------------------------------------------------------------------MSEGRRL-------------------------------------------------------------------------------------------------------------------------WLEEE-----------------LQD-DLKWS--------------VQVKSILYQGASKFQDIELIE---SG-PFGKLLMLDGKAQSAEADEFVYHESLVHPALL--LHPN-PK----------------------K-----IFIMGGGEGSTAREALRHKS-----VEKVVMVDIDQVVVEFCRDYLPA----NKE------A-FK--D---PRLEVLYND------------------ALVELERS-----------TEKFDIIIGDLAD-P--V-EGG-----P-CYKLYT--KDFYEKILKPKLA-PGGIIVTQGGPAGILSYKLVYSSIHN--TLAKV-F---------------K-HTLPYA-THVPSFA--------------DQWG--WIM----ASD----------E---P---------------------LV--E-----P-------SVK---------DT----D---ARI-------------EERVN-G---E----LGYLDG-RTLQAEMALSKAV-RK---GLAAETH----VYT----EEDAR-----------FIH---GSGIVNGH*----------------------------------------------------------------------------------------------------------------------
>GAMH_scaffold_2007624_Tsuga_heterophylla
-----------------------------------------------------------------------------------------------------------------MLGRISLHHPRLYCNTRGKSIITRLIMAESKDTHPVFDVPAKRMKSEEKIENQDSCAAKT---------------------------------TEEQLPLLCYKARG---GGELQGGCISP-----------------------VIKG-------------------------------------------------------------------------WFSKV------RVKSHGTATNVQYFNNPMWP------G---ETHSLQVEKILFEGRSEYQDLMVFQ---SV-TYGKVLVLDGVIQLSEKDERAYQEMITHLPLC--SVPN-PK----------------------K-----VLVIGGGDGGVLREVSRHIS-----VEQIDICEIDGMVIDVSKQYFPD----IAV------G-FD--D---PRVKVNVGD------------------GVAFLRDS----------PEGVYDVVIVDSSD-P--I---G-----P-AEELFK--KPFFELVAKS-LR-PGGVVCTQA--ESIWLHMPIIEDIVS--ACRQT-F---------------K-GSVNYAWTTVPTYP---------S----GVIG--FML----CST---------EG---P----------AVD--------FQ--H-----P--------IN---------PI----E-------------------KQESKVDSQRP----LKFYNS-EMHTAAFCLPAFV-RR---AIGPNVQ-----------PPSS*------------------------------------------------------------------------------------------------------------------------------------------------
>GAMH_scaffold_2054369_Tsuga_heterophylla
---------------------------------------------------------------------------------------------------------------------------------------------MGEAAANGFSINGNGHAYNDGYVNKNGTSNGH---------------------------------AVHHVNG-NGNGITAVVASNGVPGIRNRA----------------------FGDG--------------------------------------------------------------------RRRCFWYEEE-----------------IED-NLRWC--------------FALNSILHTGVSNYQDIALLD---TE-PFGKALVIDGKLQSAEVDEFIYHELLVHPALV--CHPN-LK----------------------S-----VFIMGGGEGSTAREILRHKN-----VKKVVMCDIDKEVVDFCRKYLVV----NRE------A-FN--S---SRLELIIND------------------ARAELENR-----------DERFDVIVGDLAD-P--M-EGG-----P-CYQLYT--KSFYELVLKPKLS-HRGVFVTQAGPAGVLTHTEVFSSIYN--TLRQV-F---------------K-YVVPYT-AHIPSFA--------------DTWG--WVM----ASD----------H---P---------------------LT--I-----D--------AK---------EI----D---GRI-------------KQRIK-G---D----LRFLDG-ETFMAASTLNKSV-RT---SLLKETH----VYT----EETAR-----------FVY---GHGKACHKS*---------------------------------------------------------------------------------------------------------------------
>GBGT_scaffold_2002390_Xanthidium_antilopaeum
------------------------------------------------------------------------------------------------------------------------------------------------------------------------------------------------------------------------------------------M---------------------------------------------------------------------------------------------------WFEEE-----------------LEE-DLRWV--------------FGVRNVIHREVSEFQDMELLE---SG-PFGKVLILDGKMQSAEADEWVYHESLVHPALL--HHPR-PE----------------------R-----VFIMGGGEGSTAREALRHKS-----VERVDMCDIDKVVVDFCREHLHE----NTE------T-FR--S---PRLNLIIND------------------ARKELQDG--------RGSVEGYDVIVGDLAD-P--V-DGG-----P-CYTLYT--QSFYLDILKPRLR-HGGILVTQAGPAGILTATEVYTPIYN--TLRQV-F---------------K-YVVPYA-AHVPSYA--------------DTWG--WIM----ASD----------S---P---------------------FP--E-----I--------SP--------ADV----D---KRI-------------GERVE-G---K----LKFLDG-PTVAASLALNKHL-RK---LLEQETT----VYT----EDSPL-----------FIH---GQG-TQTC-HSLEKVTQ*-------------------------------------------------------------------------------------------------------------
>GGWH_scaffold_2004255_Onychonema_laeve
-------------------------------------------------------------------------------------------------------------------------------------------------------------------MAEGGKFEGE---------------------------------------------------KQGTARANMDT----------------------VMKG-------------------------------------------------------------------------WFSEV---------------------SPMWP------G---EAHSLKIDKVLFEGKSDFQDVAIFQ---SA-TYGKVLVLDGVIQLTERDECAYQEMITHVPLC--SIPN-PK----------------------K-----VLVVGGGDGGVLREVSRHTS-----VEHIDIVEIDKMVIDVSKEHFPG----VAI------G-YT--D---PRVTVTVGD------------------GVKFLQDA----------EPGTYDAIIVDSSD-P--I---G-----P-AKQLFE--RPFFQSMARA-VR-PGGVICTQA--ESLWLHLPIIKEIAE--ACKHE-F---------------K-GSVNYAWTSVPTYP---------S----GTIG--FMV----CST---------PG---P----------VVN--------FK--S-----P--------CN---------KI----E---DQA-------------PRPANLPALPP----LKYYNS-EVHAAAFILPQFA-KE---ALDDLLT--------------N*------------------------------------------------------------------------------------------------------------------------------------------------
>GGWH_scaffold_2048665_Onychonema_laeve
------------------------------------------------------------------------------------------------------------------------------------MASFPTPGSTVASVAAHATALENGLHISNGAGGQPAHTQGK---------------------------------NGQLVTK-ASPQDLNGHAEQGETASEGAL----------------------AVHH-------------------------------------------------------------------------WFSEE-----------------LEE-DLRWV--------------FGVKHVIHREVSEFQDMELLE---TG-IFGKVLILDGKMQSAEADEFVYHECLVHPAML--HHAS-PR----------------------R-----VFIMGGGEGSTAREALRHAG-----VERVDMCDIDKVVVDFCHQYLTM----NSK------A-FS--H---PKLNLIIDD------------------AREELRRG-------VGSAAEGYDVIIGDLAD-P--V-DGG-----P-CYTLYT--KSFYEDILKPRLK-PGGILVTQAGPAGILSAREVYTPIYN--TLRQV-F---------------K-HVVPYA-AHVPSYA--------------DTWG--WIM----ASD----------S---P---------------------FE--D--------------LS-------AKDV----D---ARI-------------RERVE-G---E----LRFLDG-ATVTATMSLNKHL-RS---MLANETK----VYT----EEAPL-----------FIH---GQGTQPGHSAPTQ*-----------------------------------------------------------------------------------------------------------------
>Gingko_biloba_GBI00026425
---------------------------------------------------------------------------------------------------------------------------------------------MGETANGISVNGNGNGHAYNAHVNGNANGNGN---------------------------------GHARRIN--GTTPA---SNGLTLATSHRS----------------------FGDG--------------------------------------------------------------------QRRCCWYEEE-----------------IED-DLRWC--------------FALNSILHTGVSNFQDIALLD---TK-PFGKALVIDGKLQSAEVDEFIYHESLVHPALV--YHSN-PK----------------------T-----AFIMGGGEGSTAREILRHKT-----VKKVVMCDIDKEVVDFCKKYLVV----NRE------A-FC--S---SRLELVIND------------------ARAELEER-----------DECYDVIVGDLAD-P--M-EGG-----P-CYQLYT--KSFYEVIVKPKLN-QRGVFVTQAGPAGVLTHTEVFSSIYN--TLRQV-F---------------K-YVVPYS-AHVPSFA--------------DTWG--WVM----ASD----------H---P----------LTL--------NA--E-----E--------MD--------SRI----K---QRV-----------------K-G---E----LRFLDG-ESFIAATALNKSV-RK---SLSKETH----VYT----EETAR-----------FVH---GHG-TAGH-K*--------------------------------------------------------------------------------------------------------------------
>Ginkgo_biloba_GBI00027260
-----------------------------------------------------------------------------------------------------------------------------------------------------------MGEVADKNGNSLNGNGVN---------------------------------HRAKGKM--TPSNG---VVSGPPERVFGE---------------------------------------------------------------------------------------------GRRRCCWYEEE-----------------IED-DLRWC--------------FALNSILHTGVSQYQDIALLD---TK-PFGKALVIDGKLQSAEMDEFIYHESLVHPALV--HHAN-PK----------------------T-----VFIMGGGEGSTAREILRHKS-----VNIVVMCDIDEEVVDFCRKYLVV----NQE------A-FC--N---SRLHLVIND------------------ARAELEGR-----------SDSFDVIIGDLAD-P--I-EGG-----P-CYQLYT--KSFYENVVKPKLS-HGGIFVTQAGPAGVLTHTEVFSCIYN--TLRQV-F---------------K-YVVPYS-AHVPSYA--------------DTWG--WVM----ASD----------Q---P---------------------FM--S-----D--------TK---------EI----N---SRM-------------KHRIK-G---E----LRYLDG-ETFVAASALSKSV-RK---SLAKETH----VYT----EETAR-----------YLH---GHG-TGHK-PHV*------------------------------------------------------------------------------------------------------------------
>GKCZ_scaffold_2074789_Diselma_archeri
---------------------------------------------------------------------------------------------------------------------------------------------MGEAVATNGFSIIKGNGNGHSNGYSNGHCKGY---------------------------------SNVVPHL-PYSNGNTLHHTNGHAHISPAF-------------------------------------------------------------------------------------------GDGRRRCFWYEEE-----------------IED-DLRWC--------------FALNRILHTGVSEYQDIALID---TR-PFGKALVIDGKMQSTEVDEFIYHESLVHPALV--YHSQ-PK----------------------S-----AFIMGGGEGSTAREILRHKC-----VKKVVMCDIDKEVVDFCKKYLVV----NRE------A-FN--N---KRLELVIND------------------ARTELQNR-----------QERFDVIIGDLAD-P--V-EGG-----P-CYQLYT--KSFYELVIKPKLN-PQGIFVTQAGPAGVLTHTQVFSSIFN--TLRQV-F---------------K-HVMPYS-AHIPSFA--------------DTWG--WVM----ASD----------H---P---------------------LT--L-----E--------AQ---------EI----D---ERI-------------EERVK-G---E----LQFLDG-QTFLVAATLNKSV-RM---SLSKETH----VYT----EETAR-----------FIH---GHGKASHQ*----------------------------------------------------------------------------------------------------------------------
>GKCZ_scaffold_2074879_Diselma_archeri
-------------------------------------------------------------------------------------------------------------------------------------------------MADNSINNGASSVALDLPIKRPRSQEEI---------------------------------DNHSAPP--SLQET---AMEDGAAHSFPS----------------------VIPG-------------------------------------------------------------------------WFAEM---------------------SPMWP------G---EAHSLKVEKVLFHEKSDFQDVIVFE---SA-TYGKVLVLDGVIQLTERDECAYQEMITHLPLC--SIPN-PK----------------------K-----VLVIGGGDGGVLREVSRHNS-----VEQIDICEIDGMVVNVSKEFFPS----IAV------G-FQ--D---PRVKLSIGD------------------GVAFLKDC----------PEGTYDAVIVDSSD-P--I---G-----P-AEELFK--KPFFESVARA-LR-PGGVVCTQA--ESMWLHMPIIEDIVN--VCRQT-F---------------K-GSVNYAWTTVPTYP---------S----GMIG--FML----CST---------EG---P----------PVD--------FR--H-----P--------IN---------AI----D---KQE-------------CNLKSLG---P----LRFYNS-EMHTAAFCLPAFA-RR---AIGSKVQ-----------PSSS*------------------------------------------------------------------------------------------------------------------------------------------------
>GOWD_scaffold_2017359_Sphagnum_lescurii_75
----------------------------------------------------------------------------------------------------------------------------------------------------MGEIATAVEAGIITSTERVNHTSNG---------------------------------SRSQLLA-AAAGDGTMTTTNGAVQQQQQQ--------------------------------------------------------------------------------------------RVNKRCLWFEEE-----------------LEA-DLRWV--------------FGVSKILHTGESEFQTIELVE---SG-PFGKVLLLDGKLQSAEADEFVYHESIVHPALL--YHSN-PK----------------------K-----VFIMGGGEGSTAREVLKHSS-----VKKVVMCDIDQEVVDFCRSNLIE----NAE------A-FS--S---TRVELVIND------------------ARAELENR-----------NEKYDVIIGDLND-P--V-EGG-----P-CFTLYT--HSFYLHVIKPKLN-VGGILVTQAGPAGILSHTEVYSSIYN--TLRQT-F---------------K-YVLPYA-AHVPSYA--------------DTWG--WVM----ASD----------Q-AFP---------------------TV--N--------------IK---------ET----D---YRI-------------QKRIQ-G---D----LHFLDG-QTLCATLALNKHV-RK---TLAEETH----VYT----EDSAR-----------FIH---GYSSGLKNQN*--------------------------------------------------------------------------------------------------------------------
>GOWD_scaffold_2081966_Sphagnum_lescurii
-----------------------------------------------------------------------------------------------------------------------------------------------------------------------------------------------------------------------------------MSEITHPT----------------------IKDG-------------------------------------------------------------------------WFREI---------------------SDMWP------G---QAMTLKVKNVIHHEKSKYQDVLIFE---SA-DYGTVLVLDNVIQCTERDEFAYQEMITHLAMN--SHPS-PK----------------------K-----VLVIGGGDGGVLREVIKHDS-----VEEAILCDIDEAVIRLSKKYLPG----MAI------S-YQ--H---PKVKVHVGD------------------GFKFLDDY-----------KNEFDVIITDSSD-P--E---G-----P-AESLFQ--KPYFELLFGA-LK-EGGVITTQA--ENQWLHLPLITKLKK--DCKEV-F-----------------PNVEYAYTTIPTYP---------S----GQIG--FMV----CCK---------DA---E-----------------RD--LT--K-----P--------LR-----SWTPEE----E---EKL----------------------------CRYYNA-DIHKASFVLPTFA-RT---ALK*-------------------------------------------------------------------------------------------------------------------------------------------------------------------
>GOWD_scaffold_2083690_Sphagnum_lescurii
---------------------------------------------------------------------------------------------------------------------------------------------MAELEVPAKRARNDGLDGDLVDEEELVPASDV---------------------------------TNAASLI--SHEKDGVAPAPSTARANLSS----------------------IMPG-------------------------------------------------------------------------WFSEV---------------------SPMWP------G---EAHSLKVEKFLFEGKSDFQDVVVFE---SA-TYGRVLVLDGVIQLTQRDECAYQEMITHLPLC--SIAN-PK----------------------K-----VLVIGGGDGGVLREVSRHIS-----IEQIDICEIDKMVVDVAKEFFPD----VSI------G-FD--D---PRVNLHIGD------------------GVAFLRDV----------PEGTYDAIIVDSSD-P--V---G-----P-AQALFE--RPFYQAVARA-LR-PGGVVCTQA--ESLWLHMPTIIEIVT--VCRHT-F---------------K-GSVNYAWTSMPTYP---------S----GCIG--FML----CST---------EG---P----------PVD--------FR--H-----P--------IN---------PI----SQQQQLA-------------GEQEKPSSRLP----LKYYNS-TVHTAAFSLPQFA-MD---TLESMLT-----------PPLS*------------------------------------------------------------------------------------------------------------------------------------------------
>GRKU_scaffold_2017509_Syntrichia_princeps_79
--------------------------------------------------------------------------------------------------------------------------------------------------------------MEKMLDSLWMEINSG--------------------------------------------------WAPAKFRGSLTS---------------------------------------------------------------------------------------------------WLVVG---------------------DIFLF--------TLPTPLFSF-RILHTGVSEFQDIELVE---SG-PFGKALILDGKLQSAEADEFVYHESIVHPALL--YHDN-PK----------------------N-----VFIMGGGEGSTAREALRHHS-----VEKVVMCDIDEEVVNFCRKHLTV----NAE------A-FR--S---SRLDLVINC------------------ARAELEKR-----------TEQYDIIIGDLAD-P--V-AGG-----P-CYQLYT--KSFYERVLKPRLR-EGGILVTQGGPAGILTHTEVYSSIYN--TLRQA-F---------------K-YVLPYA-AHVPSYA--------------DTWG--WIM----ASD----------Q---P--------I-PTM--------SV--E-----E--------TD--------SRI----K---ERV-----------------D-G---E----LKFLDG-QTLSATIFLNKHV-RK---SLAAERH----VYT----EETAR-----------FIH---GHG-TALK-M*--------------------------------------------------------------------------------------------------------------------
>GUBD_scaffold_2048840_Brachiomonas_submarina
--------------------------------------------------------------------------------------------------------------------------------------------------------------------------------------------------------------MEHAKRL-------------------------------------------------------------------------------------------------------------------------WLEED-----------------LGD-DYRWS--------------YRVSSVLYSGKSEYQDVDLVD---TP-TWGKVLLLDGKMQSTEIDEECYHELLVHPPLL--HHPD-PK----------------------T-----VFIMGGGEGATAREILRHPG-----VQQVVMVDIDKVVTDFCSANLPR----NTA------A-FK--D---PRLTLINDD------------------ARAQLENW-----------QGQFDIIIGDLAD-P--L-DGG-----P-CYQLYT--QEFYQTVVLPKLN-PGGIFITQSGPAGFLSAKEVFSTIHK--TLSSV-F---------------P-FVLPYA-QHIPSFC--------------DCWG--YNM----AFK---------DA---P--STSG---------------TK--A-----P--MS----IE---------EY----D---QRA-------------GSRIQ-G---E----LHYADG-ESFQGTTKLPKAV-RK---ALAEETD----IYT----KDCARFIHGAGVKGAGQAT---GNG-VSNG-KEHAIANGHA*-----------------------------------------------------------------------------------------------------------
>GUBD_scaffold_2049682_Brachiomonas_submarina
-------------------------------------------------------------------------------------------------------------------------------------------------------------MAEEANVSASATPILP--------------------------------------------------HVPGSAKEGMSN-------------------------G-------------------------------------------------------------------------WFTEY---------------------SPMWP------G---MGMSLKVKKVLYEGKSDFQDICVFE---SE-TFGNVLLLDGVIQATERDEFSYQEMMTHLPLC--ALEEPAK----------------------K-----VLVVGGGDGGVLREIGRHSS-----VQEMHMAEIDGMVPEVSKKFLPH----MAV------G-YS--D---PRATLHICD------------------GIKFVQDA----------PEGEYDAIIVDSSD-P--V---G-----P-AEVLFE--KPFFEALHRA-VR-PGGIVCTQA--ESLWLHMEVIKALAG--MCKDV-F---------------QGGSVSYAYTTIPTYP---------S----GQIG--MML----CTKARSQSAAENGN-GSS---------------------TS--Q-----P--------LD---------PS----Q---PRQ--------PPPSPSQNSEVG---E----LRYYCP-ESHAAAFALPKFA-RD---ALSGLLT---------------------------FQ*----------------------------------------------------------------------------------------------------------------------------------
>GYBH_scaffold_2021147_Codium_fragile
------------------------------------------------------------------------------------------------------------------------------------------------------------------------MAEKI-----------------------------------------------------------------------------------------------------------------------------------------------------------------WLEEF-----------------VQE-DLKIA--------------IIQKEVLFQGKSEFQDVSLVD---TY-PYGKVLMLDGKIQSTEADEFIYHELLVHPALL--HHPD-PK----------------------S-----VFICGGGEGATAREVLRHKS-----VERVVMVDIDEVVCDFCKLHLTE----NTP------A-FN--D---KRLELIHDD------------------AASTLKKS-----------EEQFDVIIGDLAD-P--V-FGG-----P-CYHLYT--QEFYQHIVKQKLR-DGGIFVTQSGPGGVLSCSDVFLPVHN--TLKSV-F---------------P-TTLAYT-THVPSFT--------------DEWG--WNIGF--CDE---------NQ---K---------------------LL--S--------------MT---------EI----D---ARI-------------ADNVLGD--------LKFLDG-ITWKSAASLNKTV-RS---KLNKESH----ILT----KSNPR-----------FLF---GHGIKVVQ*----------------------------------------------------------------------------------------------------------------------
>GYFU_scaffold_2013218_Polypodium_hesperium
-----------------------------------------------------------------------------------------------------------------------------MQQAASAHYSNGSSLANGLNVGVAANSNGSPIVKGAHASAMNGSSNGV---------------------------------LNNTVNP-HKASVMTALSAPAMQTNGILC----------------------AQPE----------------------------------------------------------------AAAPRRPSLWYEEE-----------------IDE-NLRWC--------------FGLTSILHTGVSKFQEIALLD---TL-PFGKVLTLDRKMQSAEMDEWVYHECLVHPALL--LHQS-PK----------------------S-----IFVVGGGEGSTAREALRHRS-----VRKVVMCDIDEEVVKFCSAHLTV----NKE------A-FQ--S---SRLELVINC------------------AKAELECR-----------EEKFDVIIGDLAD-P--L-EWG-----P-CYQLYS--IGFYQNVVKPKLN-HGGIFVTQAGPAGVLSHKEVFTSIYN--TLRNV-F---------------T-YVVAYS-AHVPSYA--------------DTWG--WVV----ASD----------Q---P---------------------MM--S-----N--------MS-------SEEL----D---CRI-------------KQRIK-G---E----LKYLDG-ATLYASTILNKTV-RQ---SLENEKH----VYT----EESAR-----------FVY---GHGRNTSSAAH*-------------------------------------------------------------------------------------------------------------------
>GYFU_scaffold_2014442_Polypodium_hesperium
----------------------------------------------------------------------------------------------------------------------------MQASSNGAVACNGITTCHRESIQGISPSVYSAHASGENMNASATKGGAL--------------------MGYETPFVNVVSCSKCIIDS--SEQAI---PVNGSLSPQAEV----------------------TSPR---------------------------------------------------------------------RPSLWYEEE-----------------IDE-NLRWS--------------FGLTSILHTGVSKFQEIALLD---TQ-PFGKVLTLDRKMQSAERDEWVYHECLVHPALL--LHHS-PK----------------------S-----IYIMGGGEGSTAREALRHRS-----VRKVVMCDIDEEVVKFCSAHLSV----NRE------A-FR--S---SRLELVIND------------------AKAELESR-----------TERFDIIVGDLAD-P--L-EWG-----P-CYLLYS--KGFYQNTVKPKLN-PGGILVTQAGPAGILSHKEVFTSIFN--TLKHV-F---------------K-YVIAYS-AHVPSYA--------------DTWG--WVM----ASD----------H---P---------------------FT--Q-----I---AAIDELD--------CKI----K---QRV-----------------K-G---E----LRYLDG-ATLHASTILNKEV-RQ---SLANEKH----VYT----EDSAR-----------FVY---GHG-RSAC-AH*-------------------------------------------------------------------------------------------------------------------
>GYFU_scaffold_2025548_Polypodium_hesperium
---------------------------------------------------------------------------------------------------------------------------------MAACEVGVNQKGDAAEIRTKDGGAPPFDGSLPSLPHHSCHQVKD--------------------QGTFQRMPFHFCCPRGMDPN--APGAT---ATPGTGRANLSR----------------------GIPG-------------------------------------------------------------------------WYSEI---------------------NSMWQ------G---EAHSLKVEEILFEGKSDYQDVLIFQ---SE-AYGKVLVLDGVIQLTERDECAYQEMITHLPLC--SISN-PK----------------------K-----VLVIGGGDGGVLREISRHNS-----VDQIDICEIDQMVVDVSKKFFPE----LAV------G-YE--D---SRVKLFVGD------------------GAAFLKDV----------PKGLYDAVIVDSSD-P--I---G-----P-AQQLFE--KPFFDLVARA-LR-PGGVLCTQT--ESLWLHMHTIQDLVK--VCRQT-F---------------K-GSINYAWTSVPTYP---------S----GVIG--LML----CAT---------EG---P----------AVD--------FR--K-----P--------VN---------PI----E---KQK------------SISNGAEAHTRP----LKYYNS-EMHTAAFCLPQFV-RM---LLEPVIR------------ASS*------------------------------------------------------------------------------------------------------------------------------------------------
>GYFU_scaffold_2027555_Polypodium_hesperium
---------------------------------------------------------------------------------------------------------------MVAYSSSSSSSRSESTLSTHREEKTAHLGSSSSSSLPSSAFGVDSSSHGTCYSSVLASSGGS--------------------------CTSSPELCSLGSSA--ARMEG---VKPGSGRANISS----------------------VIPG-------------------------------------------------------------------------WFSEV---------------------SPMWP------G---EAHSLEVKEILFEGKSDFQDVLVFQ---ST-SYGKVLVLDGVIQVTERDECAYQEMITHLPLC--SVPN-PR----------------------K-----VLVIGGGDGGVLREVGRHKS-----VEQIDICEIDKMVIDVAKKFFPD----IAV------G-FA--D---PRVNLFVGD------------------GAIFLKEV----------SDGFYDAVIVDSSD-P--V---G-----P-AQQLFE--TPFFESLARV-LR-PGGVVCTQA--ESLWLHMHIIKDIFS--ACRTT-F---------------K-GSVNYAWTSVPTYP---------S----GTIG--FML----CST---------EG---P--------A--VN--------FR--Q-----P--------IN---------PI----E---KIE------------GADTNT-R---P----LRFYNS-GMHSAAFCLPQFA-RK---VLDYTS*----------------------------------------------------------------------------------------------------------------------------------------------------------------
>GYRP_scaffold_2008643_Euastrum_affine
------------------------------------------------------------------------------------------------------------------------------------------------------------------------------------------------------------------------------------------------------------------MKG-------------------------------------------------------------------------WFSEI---------------------SPMWP------G---EAHSLKVDNVLFESKSDFQDVVVFQ---SS-TYGKVLVLDGVIQLTERDECAYQEMITHVPLC--SIPN-PK----------------------K-----VLVVGGGDGGVLREVSRHVS-----VEQIDIVEIDKMVIDISKEHFPQ----TAI------G-YS--D---PRVNVVVGD------------------GVAFLKDA----------KEGTYDCIIVDSSD-P--I---G-----P-AKQLFE--RPFFQSMARA-VR-PGGVVCTQA--ESLWLHLPIIKEIAQ--ACKHE-F---------------G-GSVNYAWTSVPTYP---------S----GTIG--FMV----CST---------PG---P----------TVN--------FK--Q-----P--------CN---------RV----E---DQP-------------SRPQHLPHLPP----LKYYNS-DVHTAAFVLPQFA-KE---ALDGLLT--------------K*------------------------------------------------------------------------------------------------------------------------------------------------
>GYRP_scaffold_2018181_Euastrum_affine
---------------------------------------------------------------------------------------------------------------------------------------------------------------------------------------------------------------------------------------------------------------------------------------------------------------------------------------------MWFEEQ-----------------LEE-DLRWT--------------FGVSSIIHSQVSSFQDMDLLD---TP-RFGKVLVLDGKLQSAEFDEFVYHELLVHMALL--HHPR-PE----------------------R-----VFIMGGGAGSTAREALKHWS-----VRSVDMCDIDKVVVDFCRQHLTV----NKE------A-FS--S---PRLNLIIND------------------AKEELRVG--------RGVGEGYDVVIGDLAD-P--V-DGG-----P-CYTLYT--KSFYADVLKPRLR-PGGILVTQAGPAGILSAREVYTPIYN--TLRQV-F---------------K-YVVPYA-SHVPSYG--------------DTWG--WIM----ASD----------S---P---------------------FP--E--------------IS-------AADV----D---SRI-------------KERVE-G---E----LHYLDG-PTATAVVSLNKAL-RK---MLANETM----VYT----ESSPL-----------FIY---GQGLQNSHASLDQ*-----------------------------------------------------------------------------------------------------------------
>HMHL_scaffold_2054108_Marchantia_paleacea
-----------------------------------------------------------------------------------------------------------------------------------------MAEAITTTTTIHLNGSAPTKGSIVNVGSKRYHMGDT---------------------------------APITTPK--AVNGT---SAPKKAVNGVSA---------------------------------------------------------------------------------------------TNKSCLWFEEE-----------------LEE-DLRWV--------------FGVSKILHTGVSEFQDIQLVE---SG-PFGKVLILDGKLQSAEADEFVYHESIIHPAML--YHKD-PK----------------------N-----VFIMGGGEGSTAREALRHKS-----AKKVVMCDIDKEVVDFCREHLSV----NSE------A-FK--N---RRLELVIDD------------------ARAELERR-----------EETFDIIIGDLAD-P--V-DGG-----P-CYRLYT--QSFYESILKPRLA-PGGILVTQAGPAGILTHKEVFTSIYN--TLRQV-F---------------K-YVVPYA-AHIPSYA--------------DSWG--WVM----ASD----------H---P---------------------FP--A-----F--------ND--------EET----D---SRI-------------SKRLT-G---D----LQFLDG-TTMSALFALNKHV-RK---SLAQEGH----VYT----EETAR-----------FIH---GHG-TNLK-SH*-------------------------------------------------------------------------------------------------------------------
>HOUF_scaffold_2110613_Cryptomeria_japonica
-------------------------------------------------------------------------------------------------------------------------------------------------MADNNTNNGPSSVALDLPIKRPRSQEEI---------------------------------DNHSAAP--SSQET---AMEDGAAESYPS----------------------VIAG-------------------------------------------------------------------------WFAEM---------------------SPMWP------G---EAHSLKVDKVLFQGKSDFQDVMVFE---SA-TYGKVLVLDGVIQLTERDECAYQEMITHLPLC--SIPN-PK----------------------K-----VLVIGGGDGGVLREVSRHNS-----VEQIDICEIDGMVVDVSKEFFPN----IAV------G-FQ--D---PRVKLCIGD------------------GVAFLRDC----------PEGTYDAVIVDSSD-P--I---G-----P-AEELFK--KPFFESVARA-LR-PGGVVCTQA--ESMWLHMPIIEDIVN--VCRQT-F---------------K-GSVNYAWTTVPTYP---------S----GMIG--FML----CST---------EG---P----------PVD--------FR--D-----P--------IN---------AI----D---KQE-------------CNLKSLG---P----LRFYNS-EMHTAAFCLPAFA-RR---AIGSKVQ-----------PSSS*------------------------------------------------------------------------------------------------------------------------------------------------
>HOUF_scaffold_2110853_Cryptomeria_japonica
-----------------------------------------------------------------------------------------------------------------MLGRISLHHPRLYCNTRGKSIITRLIMAESKDTHPVFDVPAKRMKSEEKIENQDSCAAKT----------------------------------TEEQLPLLCYKAR---GGGELQGGCISP----------------------VIKG-------------------------------------------------------------------------WFSKV------RVKSHGTATNVQYFNNPMWP------G---ETHSLQVEKILFEGRSEYQDLMVFQ---SV-TYGKVLVLDGVIQLSEKDERAYQEMITHLPLC--SVPN-PK----------------------K-----VLVIGGGDGGVLREVSRHIS-----VEQIDICEIDGMVIDVSKQYFPD----IAV------G-FD--D---PRVKVNVGD------------------GVAFLRDS----------PEGVYDVVIVDSSD-P--I---G-----P-AEELFK--KPFFELVAKS-LR-PGGVVCTQA--ESIWLHMPIIEDIVS--ACRQT-F---------------K-GSVNYAWTTVPTYP---------S----GVIG--FML----CST---------EG---P----------AVD--------FQ--H-----P--------IN---------PI----E---KQE-------------SKVDSQR---P----LKFYNS-EMHTAAFCLPAFV-RR---AIGPNVQ-----------PPSS*------------------------------------------------------------------------------------------------------------------------------------------------
>HPXA_scaffold_2005944_Ptilidium_pulcherrimum
--------------------------------------------------------------------------------------------------------------------------------------------------MRVVCRTERGSVGFEDHRRQGERKRGG---------------------------------AWSTAMA--PPAGD---AAATQSATNLGS----------------------IMTG-------------------------------------------------------------------------WFSEI---------------------GPMWP------G---EAHSLKVEKQLFEGQSDFQHVQVFQ---SE-SYGKVLVLDGVIQLTERDEFSYQEMITHLPLC--SVPE-PK----------------------K-----VLVIGGGDGGVLREISRHPS-----VEHVDICEIDKMVVEVSKEFFPN----VAI------G-FK--D---PRVSVHIGD------------------GVKFLQDA----------EAKSYDVIIVDSSD-P--I---G-----P-AEGLFQ--RPFYESLARA-LR-PGGVACTQA--ESIWLHLPIIKEVVN--INSSI-F---------------K-GSVNYAWTSVPTYP---------S----GVIG--FML----CST---------EG---P--------K--VN--------FS--K-----P--------VN---------PI----E---SFA-----------STSESLK-LVKCP----LKYYNS-QVHSAALILPQFA-QE---TLEGLLT-----------SHS*-------------------------------------------------------------------------------------------------------------------------------------------------
>HPXA_scaffold_2133141_Ptilidium_pulcherrimum
-------------------------------------------------------------------------------------------------------------------------------------------------------------------------------------------------------------------------------MGGEIVHPTIQD-------------------------G-------------------------------------------------------------------------WFREI---------------------SDLWP------G---QAMTLKVKKVLHHEKSLYQDVLVFE---ST-NYGNVLVLDSAIQCTERDEFAYQEMITHLAMN--SHPN-PR----------------------K-----VLVIGGGDGGVLREVVKHKA-----VEEAVLCDIDEAVIRVSKQYLPG----MAV------G-FE--D---PRVKVHVGD------------------GFQFLNDY-----------KNSFDVIITDSSD-P--D---G-----P-ALTLFQ--KPYFQLLHDA-LR-DGGVIASQA--ENVYLHLQLINQLRK--VCKEV-F-----------------PVAEYAYTTIPTYP---------S----GQIG--FMV----CCK----------D---P----------NVN--------VK--E-----P--------LR---------SWASEDE---LRL----------------------------NKYYSS-DIHKAAFVLPNFA-KL---ALQ*-------------------------------------------------------------------------------------------------------------------------------------------------------------------
>HPXA_scaffold_2135953_Ptilidium_pulcherrimum
---------------------------------------------------------------------------------------------------------------------------------------------MTTTAKIHLNGSGPTKGSIVAVGSKRYHMGDS---------------------TPIPHINGSATNGTATNGS-AMNGSTMHVNGSVGKKNGFTK-------------------------------------------------------------------------------------------NAGSKRCLWFEEE-----------------LEE-DLRWV--------------FGVSKILQAAVSEFQDIQLVE---SG-PFGKVLLLDGKLQSAEADEFVYHESIVHPACL--YHTN-PK----------------------S-----IFIMGGGEGSTAREALKHKT-----VKKVVMCDIDKEVVDFCREHLTE----NAD------A-FR--N---RRLELVIDC------------------ARAELERR-----------EEQFDIIVGDLAD-P--V-DGG-----P-CYRLYT--QSFYEGVLKPKLA-PGGIFVTQGGPAGILSHKEVYSSIYN--TLRQV-F---------------K-YVVPYA-AHVPSYA--------------DTWG--WIM----ASD----------T---P---------------------FP--------P------FSVD---------ET----E---TRI-------------AQRVN-G---E----LRFLDG-ATMAATFALNKHV-RN---SLHKETH----VYT----EETAR-----------FIH---GHGTAQKH*----------------------------------------------------------------------------------------------------------------------
>HRWG_scaffold_2012069___2012070_Buxbaumia_aphylla_76
------------------------------------------------------------------------------------------------------------------------------------------------------------MVEYFEKGGNGVHANGT---------------------------------SNLSPNR----------VVAAAEPKKRCL---------------------------------------------------------------------------------------------------WFEEE-----------------LEE-DLRWV--------------FGVSKIIHTGVSEYQDIELVE---SG-PFGKVLILDGKLQSAEADEFVYHESIVHPALL--YHAN-PQ----------------------R-----VFIMGGGEGSTAREVLRHRS-----VEVVVMCDIDEEVVNFCRKHLSA----NAE------A-FC--S---SRLELTINC------------------ARAELEKT-----------TEQFDVIIGDLAD-P--V-AGG-----P-CYQLYT--KSFYERILKPKLK-DGGILVTQGGPAGILTHQEVYSSIYN--TLRQT-F---------------K-YVVPYA-AHVPSYA--------------DTWG--WVM----ASD----------Q-PIP--------------------TFS-----------------VE---------ET----D---SRI-------------KQRID-G---E----LRFLDG-QTLAATVALNKHV-RK---SLAAERH----VYT----EETAR-----------FIH---GHGTALKS*----------------------------------------------------------------------------------------------------------------------
>HRWG_scaffold_2015856_Buxbaumia_aphylla
----------------------------------------------------------------------------------------------------------------------------------------------------------------------MASEGTA---------------------------------NAATLIS--QDNAA---PKPSTARANLSS----------------------IMPG-------------------------------------------------------------------------WFSEV---------------------SPMWP------G---EAHSLKVEKFLFEGKSDYQDVVVFE---SA-TYGRVLVLDGVIQLTQRDECAYQEMITHLPLC--SIPN-PK----------------------K-----VLVVGGGDGGVLREVSRHKS-----IEQIDICEIDKLVVDVAKEFFPE----VAV------G-FE--D---PRVNLHIGD------------------GVAFLKEV----------QEGTYDAIIVDSSD-P--V---G-----P-AQALFE--RPFYQSLARA-LR-PGGVICTQA--ESLWLHMPIIQDIVA--ACRHT-F---------------K-GSINYAWTSVPTYP---------S----GVIG--FML----CST---------AG---P--------P--VN--------FR--H-----P--------CN---------PI----D---KAV--------------EEKQ-TSRRP----LKFYNS-SMHAAAFALPQFA-RD---VLEPLLT----------PPPSS*------------------------------------------------------------------------------------------------------------------------------------------------
>HRWG_scaffold_2016255_Buxbaumia_aphylla_70
-------------------------------------------------------------------------------------------------------------------------------------------------------------MVKSSREANSSEIINV---------------------------------ISGNPNL--TTVEA---ESPSATRKRCI----------------------------------------------------------------------------------------------------WYHEE-----------------LEE-DLRWV--------------FGVSKILHTGVSQFQDIELVE---SG-PFGKVLLLDGKLQSAEADEFVYHESIVHPALL--CHPN-PK----------------------R-----IFIMGGGEGSTAREALRHRN-----VEEVVMCDIDEEVVKFCRTHLSM----NSD------A-FR--S---SRLHLIINC------------------ARQELEKR-----------QDQFDIIIGDLAD-P--V-AGG-----P-CYKLYT--KSFYEYILKPRLK-HGGILVTQGGPAGIITHNEVYCSIYN--TLRRT-F---------------R-YVMPYA-AHIPSYA--------------DTWG--WIL----ASD----------Q---P--------I-PTF--------NA--E-----E--------TD--------TRI----Q---ERV-----------------H-G---E----LKFLDG-ETLTAIIALNKYV-RK-SQQICTQKLGRGRAYLHRRNSKIHPWRRHRIEPVML*------------------------------------------------------------------------------------------------------------------------------------
>HVBQ_scaffold_2020264_Tetraphis_pellucida_75
----------------------------------------------------------------------------------------------------------------------------------------------------------MVEYSGDERNGVHANGSNG---------------------------------TTHLSPL--NGAVS---IDAAEPKKRCCE---------------------------------------------------------------------------------------------------WFEEE-----------------LEE-DLRWV--------------FGVSKVLHKGVSDFQDIQLVE---SG-PFGKVLILDGKLQSAEADEFVYHESIVHPALL--YHPN-PK----------------------S-----VFIMGGGEGSTAREVLRHRS-----VEEVVMCDIDEEVVKFCRAHLTA----NAE------A-FR--N---SRLELVINC------------------ARAELVKQ-----------EEKFDVIIGDLAD-P--V-AGG-----P-CYQLYT--KSFYEDIVKPRLK-HGGILVTQGGPAGILTHTEVYSSIYN--TLRQT-F---------------K-YVIPYA-AHVPSYA--------------DTWG--WVM----ASD----------Q---P--------I-RAF--------SV--E-----E--------TD--------NRI----K---QRI-----------------D-G---D----LRFLDG-ETLAATVFLNKHV-RK---SLAAEKH----VYT----EGTAR-----------FIH---GHG-TAVT-N*--------------------------------------------------------------------------------------------------------------------
>HVBQ_scaffold_2020859_Tetraphis_pellucida
------------------------------------------------------------------------------------------------------------------------------------------------------------------------------------------------------------------------------------------------------------------------------------------------------------------------------------------------------------------------------------------SLKVEKFLFEGKSDFQDVVVFE---SA-TYGRVLVLDGVIQLTQRDECAYQEMITHLPLC--SIPS-PK----------------------K-----VLVVGGGDGGVLREVSRHKS-----IVQIDICEIDKLVVDVAKEYFPD----VAI------G-FE--D---PRVNLHIGD------------------GVAFLREV----------EEGTYDAIIVDSSD-P--V---G-----P-AQALFE--RPFYQSLARA-LR-PGGVVCTQA--ESIWLHMPIIENIVA--VCRHT-F---------------K-GSINYAWTSVPTYP---------S----GVIG--FML----CST---------AG---P----------SVN--------FQ--K-----P--------CN---------PI----D---QVV---------------EDKESLRKP----LKFYNS-AMHSAASSLPQFA-KS---KLEPLLT----QNVDLPRHPKHH---------LPYFQFCTVQGFPSPTMEQFKLVASYFPGCKGVAYFPPFLVITWNCLPQKPWPLTFGQIPFFCATPNNKKPPMFGRVGGSPPMEFGDPLEPWVHPRQRIKEIAEMLVNEGIGLVVFWLVWHVVVCGSCYLHRWG*
>IGUH_scaffold_2001985_Schwetschkeopsis_fabronia
--------------------------------------------------------------------------------------------------------------------------------------------------------MAMAEGDSRNAAELIAQDNAA--------------------------------------------------PAPSTARANLSN----------------------IMPG-------------------------------------------------------------------------WFSEI---------------------SPMWP------G---EAHSLKVEKFLFEGKSDYQDVVVFE---SA-TYGRVLVLDGVIQLTQRDECAYQEMITHLPLC--SIPN-PK----------------------K-----VLVVGGGDGGVLREVSRHTS-----IEQIDICEIDKMVVDVAKEFFPD----VAI------G-FN--D---PRVNLHIGD------------------GVAFLREV----------PEGTYDAIIVDSSD-P--V---G-----P-AQALFE--RPFYKSLDRA-LR-PGGVICTQA--ESLWLHMPIIKDIVA--ACGHT-F---------------K-GSINYAWTSVPTYP---------S----GVIG--FML----CSS---------AG---P----------FVN--------FR--E-----P--------CN---------PI----D---KAV-------------DTKLSSR--RP----LKFYNS-AMHAAAFSLPQFA-KE---ELEHLLT----------PLPSS*------------------------------------------------------------------------------------------------------------------------------------------------
>IGUH_scaffold_2014060_Schwetschkeopsis_fabronia_76
-----------------------------------------------------------------------------------------------------------------------------------------------------------------MVESNGAYANGP------------------------------------------SPVAS---TKAEPELKKRCL---------------------------------------------------------------------------------------------------WFEEE-----------------LEE-DLRWV--------------FGVSKILHTGVSEFQDIELVE---SG-PFGKVLILDGKLQSAEADEFVYHESIVHPALL--YHPN-PK----------------------N-----VFIMGGGEGSTAREALRHRS-----VEKVVMCDIDEEVVNFCRKHLTV----NAE------A-FC--S---KRLDLVINC------------------ARAELENQ-----------TEQFDIIIGDLAD-P--V-AGG-----P-CYQLYT--KSFYKCILKPRLK-EGGILVTQGGPAGILSHTEVYSSIYN--TLRET-F---------------K-YVLPYA-AHVPSYA--------------DTWG--WIM----ASD----------L-PIP---------------------TI--S--------------AE---------ET----D---SRV-------------KQRID-G---E----LKFLDG-QTLSATMALNKHV-RQ---SLAKERH----VYT----EETAR-----------FIH---GHGTAVKN*----------------------------------------------------------------------------------------------------------------------
>ILBQ_scaffold_2043586_Conocephalum_conicum
-----------------------------------------------------------------------------------------------------------------------------------------------------------------------------------------------------------------------MAPHG---DLPAPKPSNMDS----------------------IMPG-------------------------------------------------------------------------WFSEI---------------------GSMWP------G---EAHSLKVEKPLFDGQSDFQHVQVFQ---SE-TYGKVLVLDGVIQLTERDEFSYQEMITHLPMC--SVTD-PK----------------------R-----VLVIGGGDGGVLRELSRHTS-----IESIDMCEIDKMVVEVSKEFFPD----VSI------G-FK--D---PRVNLVIGD------------------GVKFLQDA----------ETGIYDVIIVDSSD-P--V---G-----P-AEGLFQ--RPFYESLTRA-LR-PGGVACTQA--ESIWLHLPIIKDVLT--VCSEI-F---------------K-GSVSYAWTSVPTYP---------S----GVIG--FML----CST---------EG-RTK-----------VN--------FK--K-----P--------IN---------PI--------EQI-------------VTREA-AEARP----LKYYDS-EVHSAAFVLPQFA-KK---VLQDVLC--------------S*------------------------------------------------------------------------------------------------------------------------------------------------
>ILBQ_scaffold_2045935_Conocephalum_conicum
-----------------------------------------------------------------------------------------------------------------------------------------MAESIPSTTTIHLNGSGLTKGSIVNVGSKRYHMGDT---------------------------------DLVTTTP--SPKGVNGAAAPKKSANGVSD---------------------------------------------------------------------------------------------SNTRCLWFEEE-----------------LEE-DLRWV--------------FGVSKILHTGVSEFQDIQLVE---TG-PFGKVLILDGKLQSAEADEFVYHESIVHPAML--YHKD-PK----------------------T-----VFIMGGGEGSTAREALKHRS-----VKKVVMCDIDKEVVDFCREHLTA----NAE------T-FQ--N---RRLELVIED------------------ARAELERR-----------EETFDVIVGDLAD-P--V-DGG-----P-CFTLYT--QFFYESILKPRLS-PGGILVTQAGPAGILTFKEVFSSIYN--TLRQV-F---------------K-YVVPYA-AHVPSYA--------------DSWG--WIM----ASD----------H---P---------------------FP--A-----F--------IP--------EET----D---ARI-------------SKRIV-G---E----LQFLDG-YTLAAILALNKHV-RK---TLSLESH----IYT----EDTAR-----------FIH---GHGTAPKAH*---------------------------------------------------------------------------------------------------------------------
>IOVS_scaffold_2055746_Pseudotsuga_menziesii
--------------------------------------------------------------------------------------------------------------------------------------------------MGEAATNGFSVNGNGHSYSDSYVNSRN---------------------------------GTANGHA--VHHVN---GNGNGITTAAVA----------------------VSNG--------------------------------------------------------GLGIRNRPFGEGRRRCFWYEEE-----------------IDD-NLRWC--------------FALNSILHTGVSNYQDIALLD---TE-PFGKALVIDGKLQSAEVDEFIYHELLVHPALV--CHSN-VK----------------------S-----VFIMGGGEGSTAREVLRHKN-----IKKAVMCDIDKDVVDFCRKYLVV----NRE------A-FC--S---SRLELVIND------------------ARAELENR-----------DELFDVIIGDLAD-P--V-EGG-----P-CYQLYT--KSFYEIVLKPKLS-HRGVFVTQAGPAGVLSHTEVFSSIYN--TLRQV-F---------------K-YVVPYT-AHIPSFA--------------DTWG--WVM----ASD----------H---P--------L--TI--------DA--E-----E--------ID--------GRI----K---QRI-----------------K-G---D----LRFLDG-KTFIAASTLNKSV-RN---SLSKETH----VYT----EETAR-----------FVY---GHG-KACH-KSNLSLPQK*------------------------------------------------------------------------------------------------------------
>IOVS_scaffold_2056348_Pseudotsuga_menziesii
-------------------------------------------------------------------------------------------------------------------------------------------------------MAENKNNNNNSNNNGFDLPHKR--------------------IRPQ---------EEEENDH--PPSCA---DAMDGVEGEYPS----------------------VIPG-------------------------------------------------------------------------WFAEI---------------------SPMWP------G---EAHSLKVEKVLFHSKSKYQDVMVFQ---SL-TYGKVLVLDGVIQLTERDECAYQEMITHLPLC--SVPN-PK----------------------K-----VLVIGGGDGGVLREVSRHMS-----VEQIDICEIDGMVIDVSKQYFPE----IAV------G-FD--D---PRVRVNVGD------------------GVAFLRES----------PESVYDVVIVDSSD-P--I---G-----P-AEELFK--KPFFELVARA-LR-PGGVMCTQA--ESIWLHMPIIEDIVS--ACRQT-F---------------K-GSVNYAWTTVPTYP---------S----GVIG--FML----CST---------EG---P--------A---V-D------FQ--H-----P--------TN---------PI----E---KQA-------------STESQ-R---P----LKFYNS-EMHTASFCLPAFA-RR---AIGSNVQ-----------QPLS*------------------------------------------------------------------------------------------------------------------------------------------------
>IRBN_scaffold_2158585_Scapania_nemorosa
-----------------------------------------------------------------------------------------------------------------------------------------------------------------------------------------------------------------------------------MTEITHPT----------------------IKDG-------------------------------------------------------------------------WFREI---------------------SDMWP------G---QAMILKVNSVLHHEKSKYQDVLVFE---SS-DHGTVLVLDNVIQCTERDEFSYQEMITHLAMN--AHPN-PK----------------------N-----VLVIGGGDGGVLREVVKHET-----VEKAILCDIDEAVIRVSKKYLPG----MSI------G-FQ--H---PKTETFVGD------------------GFKFLADR-----------KDEFDVIITDSSD-P--E---G-----P-AESLFQ--KPYFELLFGA-LK-DGGVITTQA--ENQWLHLPLITDLKK--ACKEV-F-----------------PVVEYAYTTIPTYP---------S----GQIG--FMV----CCK---------DA---Q-----------------RD--VK--E-----P--------LR-----SWSPEE----E---EKL----------------------------CRYYNK-EIHRASFVLPTFA-RK---ALR*-------------------------------------------------------------------------------------------------------------------------------------------------------------------
>IRBN_scaffold_2160393_Scapania_nemorosa
----------------------------------------------------------------------------------------------------------------------------------------------------------------------MAPPEGD--------------------------------------------------AAGSKSETNLGS----------------------VMTG-------------------------------------------------------------------------WFSEI---------------------GPMWP------G---EARSLKIEKQLFEGQSDFQHVQVFQ---SE-SYGKVLVLDGVIQLTERDEFSYQEMITHLPLC--SVPN-PK----------------------K-----VLVIGGGDGGVLREVSRHVS-----VQQVDICEIDKMVVDVSKEFFPS----VAI------G-FQ--D---PRVNVHIGD------------------GVKFLKEA----------EAQTYDVIIVDSSD-P--I---G-----P-AEGLFQ--KPFYESLARA-LR-PGGVACTQA--ESIWLHLPIIKEVVT--INSTI-F---------------K-GSVNYAWTSVPTYP---------S----GVIG--FML----CST---------EG---P--------A--VN--------FS--K-----P--------IN---------PI----E---SFG--------STEESLKLVK-G---P----LKYYNS-QIHNAALTLPQFA-RD---SIGDLLT----RYN*--------------------------------------------------------------------------------------------------------------------------------------------------------
>IRBN_scaffold_2165249_Scapania_nemorosa
-----------------------------------------------------------------------------------------------------------------------------------------MTEAITTTTTIHLNGSVPAKGSIVAVGSKRYHMGDS---------------------------------TPTAHTN-GSAMHA---NLPVGKKNGLAK-------------------------------------------------------------------------------------------NVGSKRCLWFEEE-----------------LEE-DLRWV--------------FGVSKILHTGVSEFQDIELVE---SG-PFGKVLILDGKLQSAEADEFVYHESIVHPASL--YHAN-PK----------------------T-----VFIMGGGEGSTAREALKHRS-----VKKVVMCDIDKEVVDFCRKHLKA----NAE------A-FS--N---HRLELVINC------------------ARTELERR-----------EEQFDIIIGDLAD-P--V-DGG-----P-CFKLYT--QSFYERVVKSRLA-PGGILVTQGGPAGILTHKEVYSSIYN--TLRQV-F---------------K-YVVPYA-AHVPSYA--------------DTWG--WIM----ASD----------H---P---------------------FP--T----FS--------VE---------ET----E---SRI-------------AQRVH-G---E----LRFLDG-ATMAATFALNKHV-RN---SLANETH----VYT----EETAR-----------FIH---GHGTAQKH*----------------------------------------------------------------------------------------------------------------------
>ISHC_scaffold_2002349_Staurastrum_sebaldi
------------------------------------------------------------------------------------------------------------------------------------------------------------------MAEEGGKFVGE---------------------------------------------------QQGTARANLDS----------------------VMKG-------------------------------------------------------------------------WFSEV---------------------SPMWP------G---EAHSLKVDEVLFEGKSDFQDVVIFK---SS-TYGKVLVLDGVIQLTERDECAYQEMITHVPLC--SIPN-PK----------------------R-----VLVVGGGDGGVLREVSRHTS-----VERIDIVEIDKMVIDVSKEHFPN----VAI------G-YE--D---PRVHVTVGD------------------GVAFLKEA----------EAGTYDAILVDSSD-P--I---G-----P-AKQLFE--RPFFQSMARA-LR-PGGVVCTQA--ESLWLHLPIIKEIAE--ACKHE-F---------------G-GSVNYAWTSVPTYP---------S----GTIG--FMV----CST---------PG---P----------AVH--------FR--T-----P--------CN---------KI----E---EQA-------------PRPDNLPTLPP----LKYYNS-EVHTAAFILPQFA-KE---ALEPLLT--------------K*------------------------------------------------------------------------------------------------------------------------------------------------
>ISHC_scaffold_2009493_Staurastrum_sebaldi
----------------------------------------------------------------------------------------------------------------------MPPLPATARLRLSSFPPLLQRDSKANPVARSLSSPGRATASLCCRPATAPPSRGS--------------------------IKCRAAMENGAPYNGAEDQAVQSKKEAAERRGGVRM---------------------------------------------------------------------------------------------------WFEEE-----------------LEE-DLRWV--------------FGVRNIIHRQVSEFQDMELLE---SG-PFGKVLILDGKMQSAEADEFVYHESLVHPALL--SHPD-PR----------------------R-----VFIMGGGEGSTAREALRHRS-----VEAVDMCDIDKVVVDFCHQHLDV----NRE------A-FS--S---KRLHVIIND------------------AKEELRKG--------IGSVEGYDVVVGDLAD-P--M-DGG-----P-CYTLYT--QSFYEAVLKPRLR-PGGILVTQAGPAGILTAKEVYTPIYN--TLRQV-F---------------K-YVVPYA-SHVPSYA--------------DTWG--WIM----ASD----------S---P---------------------FPSLS--------------AA---------EV----D---ERI-------------AERVE-G---E----LQFLDG-PTVSAAMALNKHL-RG---LLASETT----VYT----EDSPL-----------FIH---GQGTQACHSASALTQ*---------------------------------------------------------------------------------------------------------------
>ISIM_scaffold_2002785_Nephroselmis_pyriformis
-------------------------------------------------------------------------------------------------------------------------------------------------------------------------------------------------------------------------------MATHSKRL-------------------------------------------------------------------------------------------------------WLEED-----------------IEE-DLRWS--------------FIIKEILHSGHSDFQDVELVD---SG-PFGKVLLLDGKLQSAEADEIAYHECLVHPALA--HHPN-PK----------------------N-----VFIMGGGEGSTAREVLKHKG-----VERCTMVDIDGVVVEFCKKHLDV----NEE------A-FA--D---PRLDLIIDD------------------AKAGLERS-----------EILYDVIIGDLAD-P--V-YGN-----P-CYQLYT--KEFYEDVLIKKLA-PGGIFATQSGPAGILTCKQVYTAINS--TLRQV-F---------------P-KVVAYA-AHIPSFA--------------DTWG--WQL----CFT---------DG-------------------------QQ--EKLGGAA--------LE--------AAL----Q---EKF-------------------NPKYE----THFMDA-QAWDACTGLNKIV-RK---ALADEKK----AYT----LANPA-----------FIH---GAGIAHE*-----------------------------------------------------------------------------------------------------------------------
>IXLH_scaffold_2021136_Polypodium_hesperium
----------------------------------------------------------------------------------------------------------MRGRQLTETMKIHLAAHAGRIQIGPEVRHCHSYISYSGRAHSKHSYFGNMECETGSLARPSFKMEGS--------------------FCPKAVETSTTTDASLPFPT--SSKGA---AVPQAPDEGGAR----------------------RRPGV------------------------------------------------------------------------WYAEE-----------------IEQ-SLRRC--------------FGVKSVLQSGSSKYQDIALLE---TD-PFGKVLIIDNKMQSAEVDEWVYHEALVHPALL--LHPC-PS----------------------S-----VFIMGGGDGSTAREVLRHKS-----VGKVVMCDIDEDVVSFCSMHLSV----NRD------A-FR--S---SRLELIVKD------------------ARVELQDR-----------AEQFDVVIGDVAD-P--VEEGG-----S-CFCLYT--KDFYANVVKPRLS-PGGVFITQGGPAGILSHEEVFSSIYN--TLRSV-F---------------A-YVIPYA-AHVPSYA--------------DTWG--WVM----ASD----------R---P---------------------FS--D-----I--------SP--------RGL----D---AQI-------------KQRIK-G---D----LRYLDG-ETLGAMKILNKTV-RK---RLESETR----VYT----EETA*------------------------------------------------------------------------------------------------------------------------------------------------
>IZGN_scaffold_2007450_Dacrydium_balansae
-------------------------------------------------------------------------------------------------------------------------------------------------------MADKKGMSNGVVLDLSINRTRP---------------------------------EEEIIQQ--SSMAK---LDGAVLDESYPY----------------------VIPG-------------------------------------------------------------------------WFAEM---------------------SPMWP------G---EAHSLKCEKVLFRGKSDYQDVMVFQ---SS-TYGKVLVLDGVIQLTERDECAYQEMITHLPLC--SVPS-PK----------------------K-----VLVIGGGDGGVIREVSRHNS-----VEQIDICEIDRMVVDVAREFFPN----LAI------G-FA--D---PRVNLHIGD------------------GVVFLKEC----------AEGTYDVVIVDSSD-P--I---G-----P-AEELFK--RPFFESVAKV-LR-PGGIVCTQA--ESIWLHMHIIEDIVT--VCRQT-F---------------K-GSINYAWTSVPTYP---------S----GVIG--FML----CST---------EG---P----------EVD--------FQ--H-----P--------IN---------PI----D---KQE-------------SNVKSLG---P----LKFYNA-EMHKAAFCLPAFA-RR---TIGPKVQ----------------------------------------------------------------------------------------------------------------------------------------------------------------
>IZGN_scaffold_2009819_Dacrydium_balansae
----------------------------------------------------------------------------------------------------------------------------------------------MADSSDNLNNGMAASSSLDLPIKRHRTNGAG---------------------------------NSEETKV-GHSSVM---EDGAMANGSYPS----------------------VIPG-------------------------------------------------------------------------WFSEM---------------------SPMWP------G---EAHSLKVEKVLFQGKSDYQDVMVFE---SS-TYGKVLVLDGVIQLTERDECAYQEMITHLPLC--SVQN-PK----------------------K-----VLVIGGGDGGVLREVSRHNS-----VEQIDICEIDQMVVDVAKEYFPN----LAI------G-FE--D---PRVKLHIGD------------------GVAFLNGC----------REGTYDAVIVDSSD-P--I---G-----P-AEELFK--KPFFESVARA-LR-PGGVVCTQA--ESIWLHMHIIEDIVE--VCRQT-F---------------K-GSVNYAWTTVPTYP---------S----GVIG--FML----CST---------EG---P----------AVD--------FQ--H-----P--------IN---------PI----D---KKE-------------SNVKSLG---P----LKFYNS-EIHTASFCLPAFA-RR---AIGSKVQ-----------TIPS*------------------------------------------------------------------------------------------------------------------------------------------------
>IZGN_scaffold_2073106_Dacrydium_balansae
-----------------------------------------------------------------------------------------------------------------------------MGEVTAASIANGHGLNGHIGCNGYSNGNGHALLRHNNSAARATISNGV---------------------------------GAHDLPL-PSSNGVSAHHAPHLTNPQRTA----------------------TRFG------------------------------------------------------------------DGRRRCFWYEEE-----------------IED-DLRWC--------------FALNRILHTGVSDYQDIALLD---TR-PFGKALVIDGKLQSTERDEFIYHESLVHPALV--YHFN-PR----------------------S-----AFIMGGGEGSTAREILRHKS-----IKKVVMCDIDQEVVDFCRKYLVV----NRE------A-FS--N---SRLELVIND------------------ARAELESR-----------EERFDVIIGDLAD-P--V-EGG-----P-CYQLYT--KCFYELVIKPRLN-PQGIFVTQAGPAGVLTHTQVFSSIYN--TLRQV-F---------------N-YVVAYS-AHVPSFA--------------DTWG--WVM----ASD----------H---P---------------------LT--L-----R--------AQ---------EF----D---NRI-------------KDRVK-G---E----LQFLDG-QTFVVATTLNKSV-RK---SLTAETH----IYT----EETAR-----------FIH---GHGKASQL*----------------------------------------------------------------------------------------------------------------------
>JADL_scaffold_2009860_Rhynchostegium_serrulatum_75
--------------------------------------------------------------------------------------------------------------------------------------------------MVKGESNGVHVVNGVHVVNGTLHQSSF---------------------------------AAAKPTL-IGTGTPSPPPSTVEEPRKRCL---------------------------------------------------------------------------------------------------WFEEE-----------------LEQ-DLRWV--------------FGVSKILHTGVSKFQDIELVE---SG-PFGKVLILDGKLQSAEADEFVYHESIVHPALL--YHSN-PK----------------------N-----VFIMGGGEGSTAREALRHRS-----VEEVVMCDIDEEVVDFCRKHLTV----NAE------A-FR--S---DRLELVINC------------------ARAELEKR-----------TEQFDVIIGDLAD-P--V-VGG-----P-CHQLYT--KSFYENILKPRLK-EGGILVTQGGPAGILSHVEVYSSIYN--TLRET-F---------------K-HVVPYA-AHVPSYA--------------DTWG--WIM----ASD----------A---P---------------------LS--------P--------II-------PEEI----D---SRI-------------NQRID-G---E----LKFLDG-QTLSACIALNKHV-RK------RYK*----------------------------------------------------------------------------------------------------------------------------------------------------------------
>JADL_scaffold_2046364_Rhynchostegium_serrulatum
--------------------------------------------------------------------------------------------------------------------------------------------------------MAMAEGDSRNAAELISQDNAA--------------------------------------------------LAPSTARANLSN----------------------IMPG-------------------------------------------------------------------------WFSEI---------------------SPMWP------G---EAHSLKVEKFLFEGKSDYQDVVVFE---SA-TYGRVLVLDGVIQLTQRDECAYQEMITHLPLC--SIPN-PK----------------------K-----VLVVGGGDGGVLREVSRHTS-----IEQIDICEIDKMVVDVAKEFFPD----VAI------G-FD--D---PRVNLHIGD------------------GVAFLRNV----------PEGTYDAIVVDSSD-P--V---G-----P-AQALFE--RPFYKSLDRA-LR-PGGVICTQA--ESLWLHMPIIKDIVA--ACGHT-F---------------K-GSINYAWTSVPTYP---------S----GVIG--FML----CSS---------AG---P----------FVN--------FR--E-----P--------CN---------PI----D---KAV-------------DTKLSSR--RP----LKFYNS-AMHAAAFSLPQFA-KE---ELEHLLT----------PPPSS*------------------------------------------------------------------------------------------------------------------------------------------------
>JBLI_scaffold_2011418_Danaea_sp.
--------------------------------------------------------------------------------------------------------------------------------------------------MSANSMKGGVLAGNELPIVNCSKCSID---------------------------------SNEQAIQ-MNGGLS---PHPEVTSPRRPS--------------------------------------------------------------------------------------------------LWYEEE-----------------IDE-NLRWS--------------FGLTSILHTGVSKFQEIALLD---TQ-PFGKVLTLDRKMQSAERDEWVYHECLVHPALL--LHQS-PK----------------------S-----IYIMGGGEGSTAREALRHRS-----VRKVVMCDIDEEVVKFCSAHLSV----NRE------A-FQ--S---SRLELVIND------------------AKAELESR-----------IERFDVIVGDLAD-P--L-EWG-----P-CYLLYS--KGFYQNIVKPKLN-PGGILVTQAGPAGILSHKEVFTSIFN--TLKHV-F---------------K-YVVAYS-AHVPSYA--------------DTWG--WVM----ASD----------Q---P---------------------FT--Q--------------IS---------AI----DELDCKI-------------KQRIK-G---E----LRYLDG-ATLHASTILNKEV-RQ---SLANEKH----VYT----EDSAR-----------FVY---GHGRSACAH*---------------------------------------------------------------------------------------------------------------------
>JBLI_scaffold_2019014_Danaea_sp.
---------------------------------------------------------------------------------------------------------------------------------------------------------------------------------------------------------------------------------------------------------------------------------------------------------------------------------------------------------------------------------------------------------------------------------MQSAEMDEWVYHECLVHPALL--LHNS-PK----------------------S-----IFIAGGGEGSTAREALRHRS-----VRKIVMCDIDEEVVKFCSAHLTV----NKE------A-FQ--S---SRLELVINC------------------AKAELECR-----------DEKFDVIIGDLAD-P--L-EWG-----P-CYQLYS--IGFYQNVVKPKLN-QGGIFVTQAGPAGVLSHKEVFTSIYN--TLRNV-F---------------T-YVVAYS-AHVPSYA--------------DTWG--WVV----ASD----------Q---P--LMSNMSS---EE--------------------------LD--------CRI----K---QRI-------------K--G------E----LKYLDG-ATLYASTILNKTV-RQ---SLENEKH----VYT----EESAR------FV-----Y---GHG-RNTS-SAAH*-----------------------------------------------------------------------------------------------------------------
>JBLI_scaffold_2020406_Danaea_sp.
-----------------------------------------------------------------------------------------------------------------------------MAACDVGIEQKGDIAPSAAEKCTEDARTRLCDGSLSAPLRRSFHQAKD--------------------EGTFQRMPFHFCCPRGLDPR--APGAT---ATPGSGRANLSH----------------------GIPG-------------------------------------------------------------------------WYSEI---------------------NSMWQ------G---EAHSLKVEKILFEGKSDYQDVLVFQ---SE-AYGKVLVLDGVIQLTERDECAYQEMITHLPLC--SISN-PK----------------------K-----VLVIGGGDGGVLREISRHNS-----VDQIDICEIDKMVVDVSKKFFPE----LAV------G-YD--D---PRVKLFVGD------------------GAVFLKDV----------PEGIYDAVIVDSSD-P--I---G-----P-AQQLFE--KPFFDLVARA-LR-PGGVLCTQT--ESLWLHMHTIQDL------------------------------------------------------------------------------------------------------------------------------------------------------------------------------------------------------------------------------------------------------------------------------------------------------------------------------------------------------------------------------------
>JBLI_scaffold_2100139_Danaea_sp.
--------------------------------------------------------------------------------------------------------------------------------------------------------------------------------------------------------------------------------------------------------------------------------------------------------------------------------------------------------------------------MWP------G---EAHSLEVKEILFEGKSDFQDILAFQ---SA-TYGKVLVLDGVIQVTERDECAYQEMITHLPLC--SIPN-PR----------------------K-----VLVIGGGDGGVLREVARHKS-----VEQIDICEIDKMVIDVAKKFFPH----IAV------G-FE--D---PRVKLFVGD------------------GAVFLKEV----------SDGFYDAVIVDSSD-P--V---G-----P-AQQLFE--TPFFESLARV-LR-PGGVVCTQA--ESLWLHMPIIKDIFS--ACRKT-F---------------K-GSVNYAWTSVPTYP---------S----GTIG--FML----CST---------EG---P----------AVN--------FR--E-----P--------IN---------PI----E---KIE-------------GSDRNTT---P----LRFYNS-EMHSSAFCLPQFA-RQ---AFDYTS*----------------------------------------------------------------------------------------------------------------------------------------------------------------
>JDQB_scaffold_2009355_Neocallitropsis_pancheri
-------------------------------------------------------------------------------------------------------------------------------------------------MADNKINNGASSVGLDLPIKRPRSQEEI---------------------------------DNHSAPP--SLQET---AMEDGAAESYPS----------------------VIPG-------------------------------------------------------------------------WFAEM---------------------SPMWP------G---EAHSLKVEKVLFHEKSDFQDVIVFE---SA-TYGKVLVLDGVIQLTERDECAYQEMITHLPLC--SIPN-PK----------------------K-----VLVIGGGDGGVLREVSRHNS-----VEQIDICEIDGMVVNVSKEFFPS----IAV------G-FQ--D---PRVNLSIGD------------------GVAFLKDC----------SEGTYDAVIVDSSD-P--I---G-----P-AEELFK--RPFFESVARA-LR-PGGVVCTQA--ESMWLHMPIIEDIVN--VCRQT-F---------------K-GSVNYAWTTVPTYP---------S----GMIG--FML----CST---------EG---P----------PVD--------FR--H-----P--------IN---------VI----D---KQE-------------CNLKCLG---P----LRFYNS-EMHTAAFCLPAFA-RR---AIGSKVQ-----------SSSS*------------------------------------------------------------------------------------------------------------------------------------------------
>JDQB_scaffold_2069180_Neocallitropsis_pancheri
-----------------------------------------------------------------------------------------------------------------------------------------MGEAVATNGFSVKGNGINGHCNGYSNGHCNGYSNGF---------------------------------SNGVAHL-PYSNGSTVNHTNGHAHLSPSF-------------------------------------------------------------------------------------------GDGRRRCFWYEEE-----------------IED-DLRWC--------------FALNRILHTGVSDYQDIALID---TR-PFGKALVIDGKMQSTEVDEFIYHESLVHPALV--YHSQ-PK----------------------S-----AFIMGGGEGSTAREILRHKC-----VKKVVMCDIDKEVVDFCKKYLVV----NRE------A-FN--N---SRLELVIND------------------ARTELQNR-----------QERFDVIIGDLAD-P--V-EGG-----P-CYQLYT--KSFYELVIKSKLN-PQGIFVTQAGPAGVLTHTQVFSSIYN--TLRQV-F---------------K-YVMPYS-AHIPSFA--------------DTWG--WVM----ASD----------H---P---------------------FS--L-----E--------AE---------EI----D---MRI-------------EQRVK-G---E----LQFLDG-QTFLVAATLNKSV-RM---SLSKETH----VYT----EETAR-----------FIH---GHGKASYQ*----------------------------------------------------------------------------------------------------------------------
>JHFI_scaffold_2111827_Pellia_neesiana
----------------------------------------------------------------------------------------------------------------------------------------------------------------------MSPPAGG--------------------------------------------------DAAAQPKTNLGS----------------------IMTG-------------------------------------------------------------------------WFSEI---------------------GTMWP------G---EAHSFKIEKQLFEGQSDFQHVQVFQ---SE-TYGKVLVLDGVIQLTERDEFSYQEMITHLPLC--SVKE-PK----------------------K-----VLVIGGGDGGVLKEVSRHSS-----VEHVDICEIDKMVVDVSKEFFPN----IAV------G-FQ--D---PRVNVHIGD------------------GVKFLQDA----------EAGSYDVIIVDSSD-P--V---G-----P-AEGLFQ--KPFYESMARA-LQ-PGGVACTQA--ESIWLHLPIIKEVIS--INAGI-F---------------K-GSVNYAWTSVPTYP---------S----GVIG--FML----CST---------AG---P--------------EVN----FS--K-----P--------IN---------PI----E---AFV--------TSDESRKLVK-G---P----LKYYNS-QVHSAALVLPQFA-KE---ELGDLLT----SYS*--------------------------------------------------------------------------------------------------------------------------------------------------------
>JHFI_scaffold_2112485_Pellia_neesiana
-----------------------------------------------------------------------------------------------------------------------------------------MTEAITTTTTIHLNGSGTPKGSIVAVGSKRYHMGDS-----------------------------------TPAPV-PHLNGSAMHLNGSAGKKNVPA----------------------VNNG------------------------------------------------------------------NKAKRCLWFEEE-----------------LEE-DLRWV--------------FGVSKILHTGVSEFQDIELVE---SG-PFGKVLILDGKLQSAEADEFVYHESIVHPACL--YHNN-PR----------------------T-----VFIMGGGEGSTAREALKHRS-----VKKVVMCDIDKEVVDFCREHLTA----NAE------A-FR--N---RRLELVIDC------------------ARAELERR-----------EEQFDIIIGDLAD-P--V-DGG-----P-CYRLYT--QSFYERVLKPKLA-PGGILVTQAGPAGILTHKEVYSSIYN--TLRQV-F---------------K-YVVPYA-AHVPSYA--------------DTWG--WIM----ASD----------H---P---------------------FP--------P------FSVD---------ET----D---SRI-------------SNRVS-G---E----LRFLDG-ATMAATFALNKHV-RT---SLHQETH----VYT----EETAR-----------FIH---GHGTAQKH*----------------------------------------------------------------------------------------------------------------------
>JKAA_scaffold_2014146_Selaginella_wallacei
-------------------------------------------------------------------------------------------------------------------------------------------------------------MGEVHVNGTVMQCTSN---------------------------------AKAATNG----------NVLDSKNRNRGL---------------------------------------------------------------------------------------------------WFEEE-----------------IEE-DLRWV--------------FSVSRVLHTGVSEFQDIALVE---SG-PFGKVLILDGKLQSAEADEFVYHECLVHPALL--YHPN-PK----------------------N-----VFIMGGGEGSTARESLRHKS-----VKKVVMCDIDKEVVDFCKAHLTM----NRD------A-FH--S---NRLDLVIND------------------ARAELEES-----------RDKFDIIIGDLAD-P--V-DGG-----P-CYKLYT--QSFYEKVLKPRLS-PGGIVVTQGGPAGILTHSEVYSSIYN--TLRKV-F---------------K-YVVPYA-AHVPSYS--------------DTWG--WIM----ASD----------Q---P---------------------FP--Q--------------IS-------ASET----D---TRT-------------RQRLD-G---E----LRFLDG-ETLNATLALNKHV-RQ---TLAQETH----VYT----EETAR-----------FVH---GHGVV*-------------------------------------------------------------------------------------------------------------------------
>JKAA_scaffold_2179374_Selaginella_wallacei
---------------------------------------------------------------------------------------------------------------------------------------------------MASQGESRVENGGVANAAVAISKDQA--------------------------------------------------PVQGTARANLSR----------------------IMPG-------------------------------------------------------------------------WFSEV---------------------SPMWP------G---EAHSLKVEKVLFEGKSDFQDIVVFE---SQ-SYGKVLVLDGVIQLTERDECAYQEMITHLPLC--SISN-PK----------------------K-----VLVVGGGDGGVLREVSRHGS-----VEHIDICEIDKMVVDVSKEFFPD----IAV------G-YE--D---PRVHVHIGD------------------GVAFVRDA----------AAATYDAIIVDSSD-P--I---G-----P-AQQLFE--KPFFESMAKA-LR-PGGVICTQA--ESPWLHMHIIKDIVS--VSRQT-F---------------K-GSVNYAWTSVPTYP---------S----GVIG--FML----CAT---------EG---A----------TVN--------FR--S-----P--------VN---------PV----E---KLD------------MTSIKDGGPLKRSRAPLRYYNS-GMHAAAFNLPQFA-KQ---ELEHLLT--------------P*------------------------------------------------------------------------------------------------------------------------------------------------
>JKAA_scaffold_2179962_Selaginella_wallacei
-------------------------------------------------------------------------------------------------------------------------------------------------------------------------------------------------------------------------------MGSATRRSL------------------------------------------------------------------------------------------------------WFEEE-----------------IDE-NLRWL--------------YTVTKILHTGASEYQDIALVQ---TG-PFGKVLLLDGKLQSAETDEFVYHEALVHPALL--SHPD-PQ----------------------F-----VFVMGGGEGSTVREALRHKS-----VKKVVMCDIDEEVVNFCRAFFTV----NRE------A-FR--S---NRLELVIRD------------------ARAELENR-----------EEMFDIIIGDLAD-P--I-EGG-----P-CCELYT--RFFYEAVLKPRLK-AGGIFVTQAGPAGVLSHEEVFSSIYK--KLKAV-F---------------S-YVLPYA-AHIPSYS--------------DTWG--WIM----ASD----------K-PLP--------------------RFV-----------------AK---------EM----D---LRI-------------KQQLNSE--------LSFLDG-GTLEGLAALNKKT-RQ---ALDLKGT-----------AESKREE*---------------------------------------------------------------------------------------------------------------------------------------------
>JKKI_scaffold_2003094_Lobomonas_rostrata
--------------------------------------------------------------------------------------------------------------------------------------------------------------------MGESYAKRL-----------------------------------------------------------------------------------------------------------------------------------------------------------------WLEED-----------------LGD-DYRWS--------------YRVSAVLFSGKSDYQEIDLVD---TP-TWGKVLLLDGKMQSTEADEEVYHELLVHPALL--HHPS-PR----------------------R-----VFIMGGGEGATAREVLRHKS-----VERVVMVDIDKVVTDFCSQHLER----NRA------A-FA--D---ARLTLVNDD------------------ARAQLEAS----------PDASYDIIIGDLAD-P--L-DGG-----P-CFQLYT--QEFYRNVVMRKLA-PGGIFVTQSGPAGFLSASEVFSAIHA--TLRSV-F---------------P-CVVPYT-QHIPSFC--------------DHWG--YNMAFGDASQ----------A---P---------------------LS--A-----A-------------------EL----D---ERI-------------PQRIA-G---A----MHFLDG-DTFTGVRHLNKLV-RQ---ALAQEQE----VYT----ADSAR-----------FIH---GTG-IKK*-----------------------------------------------------------------------------------------------------------------------
>JMXW_scaffold_2042166_Bryum_argenteum
----------------------------------------------------------------------------------------------------------------------------------------------------------MAEEGSRNAAELIAQDNAA--------------------------------------------------PVPSTARANLST----------------------IMPG-------------------------------------------------------------------------WFSEI---------------------SPMWP------G---EAHSLKLEKFLFEGKSDYQDVVVFE---ST-TYGRVLVLDGVIQLTQRDECAYQEMITHLPLC--AIPN-PK----------------------K-----VLVIGGGDGGVLREVSRHKS-----IEQIDICEIDKMVVDVAKEFFPD----VAI------G-FN--D---PRVNLHIGD------------------GVAFLREV----------SEGTYDAIIVDSSD-P--V---G-----P-AQALFE--RPFYKSLDRA-LR-PGGVICTQA--ESLWLHMPIIKEIVA--ACSHT-F---------------K-GSINYAWTSVPTYP---------S----GVIG--FML----CST---------AG---P----------AVN--------FR--Q-----P--------CN---------LI----E---NAV-------------DDKPSSR--RP----LKFYNS-SMHAAAFSLPQFA-RE---ELEHLLT----------PPPSS*------------------------------------------------------------------------------------------------------------------------------------------------
>JTIG_scaffold_2029681_Bryopsis_plumosa
-------------------------------------------------------------------------------------------------------------------------------------------------------------------------------------------------------------------------------MAAGSFDQGYNA----------------------VKDG-------------------------------------------------------------------------WFTEL---------------------GVMWP------G---QGLSLQVKEILYRGKSKFQDVAVFE---SE-SNGKVLVLDGVIQCTDRDEFSYQEMIVNLPLC--SLETAAK----------------------R-----VLVVGGGDGGVLREIAKHSS-----VEKIDIAEIDETVVTVSKEFFPE----MAV------G-FS--D---PRVALKICD------------------GIEFVKNA----------EEGSYDAIIVDSSD-P--V---G-----P-AEVLFE--RPFFEAMHRA-LR-PGGVVCTQA--ESIWLHMSIIKELAS--MCADV-F---------------RGGSISYGYTTIPTYP---------S----GQIG--FMT----CFK-----AEEGKG-------------------------LV--N-----P-----------------------------SQP-------------KQPPPQGGGVP----LRYYNS-AIHTAAFTLPEFA-SQ---ALVGSLS------------FHG*------------------------------------------------------------------------------------------------------------------------------------------------
>JTIG_scaffold_2029780_Bryopsis_plumosa
-------------------------------------------------------------------------------------------------------------------------------------------------------------------------------------------------------------------------------------MTSCGV---------------------------------------------------------------------------------------------------WFEEE-----------------IQP-DLKWS--------------FSVDSIYHHGRSKFQDVHMIN---TG-PFGKVLVLDGKLQSAEADEFVYHELLVHPALL--NHPN-PR----------------------S-----VFICGGGEGSTAREVLKHKS-----VERCVMVDIDQVVCDVCSTELEV----NQK------A-FK--D---PRLDLIIDD------------------AGGTLEDS-----------TEKFDVIIGDLAD-P--V-FGG-----P-CYHLYT--QDFYQRVVKSKLR-EGGIFVTQSGPAGVLSCGEVFSPINN--TLSSV-F---------------P-TVVPYT-QHMPSFS--------------DTWG--WNM----AFT-------DPSQ---P---------------------LL--T-----P---------A---------QI----D---ARI-------------QDSIE-G---D----LKFLDG-ATWTGVSSLNKIV-RR---KVESETH----IYS----RDNPR-----------FIH---GKG-IKTL-A*--------------------------------------------------------------------------------------------------------------------
>JUWL_scaffold_2013666_Keteleeria_evelyniana
---------------------------------------------------------------------------------------------------------------------------------------------------MAENNNNNNGNNGFDLPIKRIRPEEE-----------------------------------EEGDH--PPCCV---DAMDGVDGGYPS----------------------VIPG-------------------------------------------------------------------------WFAEI---------------------SPMWP------G---EAHSLKVEKVLFQGKSKYQDVMVFQ---SL-TYGKVLVLDGVIQLTERDECAYQEMITHLPLC--SIPN-PK----------------------K-----VLVIGGGDGGVLREVSRHIS-----VEQIDICEIDGMVIDVSKQYFPD----IAV------G-FD--D---PRVKVNVGD------------------GVAFLRDS----------PESIYDAVIVDSSD-P--V---G-----P-AEELFK--KPFFELVARA-LR-PGGVVCTQA--ESIWLHMPIIEDIVS--ACRQT-F---------------K-GSVNYAWTTVPTYP---------S----GVIG--FML----CST---------EG---P--------A--VD--------FQ--H-----P--------IN---------PI----E---KQE-------------SNVDS-SR--P----LKFYNS-EMHTASFCLPAFA-RR---AIGPSVQ-----------PPLS*------------------------------------------------------------------------------------------------------------------------------------------------
>JUWL_scaffold_2016551_Keteleeria_evelyniana
---------------------------------------------------------------------------------------------------------------------------------------------MGEAAANGFSINGNGHAYNDGHVNKNGTANGH---------------------------------AVHHVNG-NGNGITALAASNGVPGIRNRT----------------------FGDG--------------------------------------------------------------------RRRCFWYEEE-----------------IED-NLRWC--------------FALNSILHTGVSNYQDIALLD---TE-PFGKALVIDGKLQSAEVDEFIYHELLVHPALV--CQPN-LK----------------------S-----VFIMGGGEGSTAREILRHKN-----VKKVVMCDIDKEVVDFCRKYLVV----NRE------A-FC--S---SRLELVIND------------------ARAELENR-----------DERFDVIVGDLAD-P--M-EGG-----P-CYQLYT--KSFYELVLKPKLS-HRGVFVTQAGPAGVLTHTEVFSSIYN--TLRQV-F---------------K-YVVPYT-AHVPSFA--------------DTWG--WVM----ASD----------H---P---------------------LT--I-----D--------AK---------EI----D---GRI-------------KQRIK-G---E----LRFLDG-ETFMAASTLNKSL-RT---SLLKETH----VYT----EETAR-----------FVY---GHGKACHKS*---------------------------------------------------------------------------------------------------------------------
>JVSZ_scaffold_2010852_Equisetum_hymale
---------------------------------------------------------------------------------------------------------------------------------------------------------------------------------------------------------------------------------------------------------------------------------------------------------------------------------------------------------------------------------------------------------------------------------MQSAEVDEFVYHECLVHPAML--HHSS-PR----------------------N-----VFIMGGGEGSTAREVLRHKT-----VQKVVMCDIDREVVAFCKAHLPL----NRE------A-FH--S---SRFELVIND------------------ARAELEKR-----------EEGFDIVIGDLAD-P--V-EGG-----P-CYQLYS--KGFYERVLKPRLN-PGGIFVTQAGPAGVLSHGEVFTSIYN--TLRNV-F---------------K-HVVAYA-THIPSYA--------------DTWG--WIM----ASD---------EA-------------------------FS--Q-----S--------TE---------CL----D---ARI-------------EERVVKG---E----LRFIDG-ATIHSSAVLNKLV-RK---ALETEIH----VYT----EESAR-----------FVY---GKGMAATSSQ*--------------------------------------------------------------------------------------------------------------------
>JZVE_scaffold_2003889_Parasitaxus_usta
----------------------------------------------------------------------------------------------------------------------------------------------------------MAGNSNGDVSDLPIKRSRP---------------------------------GDEIIQQ--STMAQ---LDGAALDESYPS----------------------VIPG-------------------------------------------------------------------------WFSEM---------------------SPMWP------G---EAHSLKCEKVLFRGKSDYQDVMVFQ---SS-TYGKVLVLDGVIQLTERDECAYQEMITHLPLC--SVPN-PK----------------------K-----VLVIGGGDGGVLREVSRHNS-----VKQIDLCEIDRMVVDVARKYFPN----LAI------G-FV--D---PRVMLHIGD------------------GVAFLKEC----------AEGTYDVVIVDSSD-P--I---G-----P-AEELFK--RPFFELVAKV-LR-PGGVMCTQA--ESIWLHMHIIEDIVD--VCRQT-F---------------K-GSVNYSWTSVPTYP---------S----GVIG--FML----CST---------EG---P--------E--VD--------FR--H-----P--------IN---------PI----D---KQE------------SGVKAL-G---P----LKFYNA-EMHTAAFCLPAFA-RS---AIGHKVQ-----------SSSS*------------------------------------------------------------------------------------------------------------------------------------------------
>JZVE_scaffold_2003890_Parasitaxus_usta
---------------------------------------------------------------------------------------------------------------------------------------------------MAKSNVNLNNGVDLSIKKHRTDGGLA---------------------------------SEDIRVG--HSSVM---EDAAMANGSYPS----------------------VIPG-------------------------------------------------------------------------WFAEM---------------------SPMWP------G---EAHSLKVEKVLFRGKSDYQDVMVFE---SS-TYGKVLVLDGVIQLTERDECAYQEMITHLPLC--SVQN-PK----------------------K-----VLVIGGGDGGVLREVSRHNS-----VEQIDICEIDRMVVDVAKEYFPK----LAI------G-FE--D---PRVKLLIGD------------------GVAFLNGC----------PEGTYDAVIVDSSD-P--I---G-----P-AEELFK--KPFFESAARA-LR-PGGVVCTQA--ESIWLHMHIIEDIVD--VCRQT-F---------------K-GSVNYAWTTVPTYP---------S----GVIG--FML----CST---------EG---P--------A--VD--------FQ--H-----P--------IN---------PI----D---KQD------------SNIKAL-G---P----LKFYNS-EIHTASFCLPAFA-RR---AIGSKVQ-----------KIPC*------------------------------------------------------------------------------------------------------------------------------------------------
>JZVE_scaffold_2036975_Parasitaxus_usta
-------------------------------------------------------------------------------------------------------------------------------------------------------------MPLPLPMGEAANGNGV---------------------------------RESENGN--GTAMG---RGYGEGRRRCC----------------------------------------------------------------------------------------------------WYEEE-----------------VDD-DLRWC--------------FALNSILHTGVSEYQDIALLD---TK-PFGKILIIDGKLQSAELDEFIYHESLVHPALL--HHPN-PK----------------------T-----AFIMGGGEGSTAREILRHKT-----VDKVVMCDIDEEVVDFCKKHLAA----NRE------A-FS--S---SLLDLVIND------------------ARAELERR-----------VECFDVIVGDLAD-P--I-QGG-----P-CYQLYT--KSFYERVVKPKLS-HGGIFVTQAGPAGVLSHTQVFSCIYN--TLRQV-F---------------K-YVVPYS-AHIPSFA--------------DAWG--WVM----ASD----------H---P---------------------FT--L-----S--------SE---------EM----E---SRI-------------KQRVE-G---E----LRYLDG-ETYAGAWRLNKSV-RK---ALAKESH----VYT----EETAR-----------YIY---GHG-TAHI-*---------------------------------------------------------------------------------------------------------------------
>KADG_scaffold_2007261_Ignatius_tetrasporus
--------------------------------------------------------------------------------------------------------------------------------------------------------------------MADSDGRRM-----------------------------------------------------------------------------------------------------------------------------------------------------------------WLEEY-----------------IQD-DLRMH--------------MSIVNVLHAGQSEFQQVELCT---SG-PFGKVLLLDGKVQSAEADEFVYHECLVHPALL--HHPN-PK----------------------T-----VFICGGGEGATAREVLRHKS-----VEKVVMVDIDKVVCDFCAQHLEA----NKA------A-FS--D---PRLELIYDD------------------AQAQLEKY-----------NGKFDVIIGDLAD-P--V-YGG-----P-CYQLYT--QEFYKNIVAQRLH-PGGIFVTQSGPCGVLSHTEVFSSIHN--TLKSV-F---------------P-RVVPYA-YHIPSYS--------------DMWG--WNMA---CSD---------AQ---Q---------------------HV--L-----T--AD---------------EF----D---ARV-------------GERLS-Q---P----LQFLDG-MTFAAAASMNKPT-RN---SLASEER----IYT----VDTPF-----------FIQ---GHG-VKSL-V*--------------------------------------------------------------------------------------------------------------------
>KADG_scaffold_2044002_Ignatius_tetrasporus
----------------------------------------------------------------------------------------------------------------------------------------------------------MAESAQQQSKKQKTENGNS--------------------------------------------------GTPGTADEGLNA----------------------VKSG-------------------------------------------------------------------------WFTEL---------------------STLWP------G---QGLSLKVKEVLFQGRSDFQDVCVAE---TDSAFGRVLLLDGVIQCTQFDEFSYQEMIAHLPMC--ALQEPAK----------------------K-----ALVVGGGDGGVLRELARHDS-----LTHIHIAEIDGMVPEMAKKYFPQ----MAV------G-FD--D---PRVSVHICD------------------GIKFVQDA----------DEGTYDVIIVDSSD-P--V---G-----P-AEVLFQ--KPFFEAMHRA-LK-PGGIVCTQG--ESMWLHLNIIKSVAS--MCRDV-F---------------QNGSVTYGFTTIPSYP---------S----GQIG--FMI----CCK---------AT---P-------------------------N--------------AA---------PL----D---PRQ-------------PRQKVPSSDRP----TKYYSE-DVHKAAFVLPNFV-KE---ALQGCLT---------------------------FQ*----------------------------------------------------------------------------------------------------------------------------------
>KEFD_scaffold_2059490_Encalypta_streptocarpa
------------------------------------------------------------------------------------------------------------------------------------------------------------MAMGRTEDEQAAAEGSR---------------------------------NAAELIA--QDNAA---PAPSTARANLSS----------------------IMPG-------------------------------------------------------------------------WFSEI---------------------SPMWP------G---EAHSLKVEKFLFEGKSDYQDVVVFE---SA-TYGRVLVLDGVIQLTQRDECAYQEMITHLPLC--SIPN-PK----------------------K-----VLVVGGGDGGVLREIARHKS-----VEHIDICEIDKLVVDVAKEFFPD----VAV------G-FQ--D---PRVNLHIGD------------------GVAFLREV----------PEGTYDAIIVDSSD-P--V---G-----P-AQALFE--RPFYKTLDRA-VR-PGGVICTQA--ESLWLHMPIIKDIVA--ACRHT-F---------------K-GSINYAWTSVPTYP---------S----GVIG--FML----CST---------AG---P--------A--VN--------FL--E-----P--------CN---------PI----D---QAV--------------DDEK-SSRRP----MKFYNS-SMHAAAFSLPQFA-KT---ELESLLT----------PPPSS*------------------------------------------------------------------------------------------------------------------------------------------------
>KEFD_scaffold_2059853_Encalypta_streptocarpa_76
--------------------------------------------------------------------------------------------------------------------------------------------------------------MNGCASHQSYANKTV--------------------------------------------------AVAEAEPKKRCL---------------------------------------------------------------------------------------------------WFEEE-----------------LEE-DLRWV--------------FGVSKILHTGVSEFQDIELVE---SG-PFGKVLILDGKLQSAEADEFVYHESIVHPALL--YHSS-PK----------------------N-----VFIMGGGEGSTAREALRHRS-----VEKVVMCDIDKEVVDFCRKHLTV----NAE------A-FR--S---NRLDLVINC------------------ARTELEKR-----------TEQFDIIVGDLAD-P--V-AGG-----P-CYQLYT--KSFYERILKPRLK-DGGILVTQGGPAGILSHTEVYSSIYN--TLRQT-F---------------K-YVVPYA-AHVPSYA--------------DTWG--WVM----ASD----------K---P---------------------FP--T--------------IS-------AEET----D---GRT-------------KQRIE-G---E----LKFLDG-QTLSATIALNKHV-RR---SLEAERH----VYT----EETAR-----------FIH---GHGTNLKN*----------------------------------------------------------------------------------------------------------------------
>KEYW_scaffold_2025209_Gonatozygon_kinahanii
-------------------------------------------------------------------------------------------------------------------------------------------------------------MASEETKAAEAGKYEG--------------------------------------------------QTQGTARANMDT----------------------VMKG-------------------------------------------------------------------------WFSEI---------------------SPMWP------G---EAHSLKIEKVLFEGKSDFQDVAVFE---SA-TYGRVLVLDGVIQLTQRDESAYQEMITHVPLC--SIPN-PK----------------------K-----VLVVGGGDGGVLREVSRHTS-----VEQIDIAEIDGMVIDVSKKYFPE----LAI------G-YT--D---PRVNVHVGD------------------GVAFLKNV----------PEGTYDAIIVDSSD-P--I---G-----P-AQQLFE--RPFFESMARA-LR-PGGVVCTQA--ESIWLHLEIIKEIAQ--ACKHS-F---------------K-GTVNYAWTSVPTYP---------S----GTIG--FMV----CST---------PG---P----------EVD--------FK--T-----P--------IN---------KI----E---EQA-------------PRPDSWPKLEP----LKFYNS-EIHRAALVLPQFA-KT---ALAPYLS--------------P*------------------------------------------------------------------------------------------------------------------------------------------------
>kfl00376_0130_v1.1_Klebsormidium_nitens
--------------------------------------------------------------------------------------------------------------------------------------------------------------------------------------------------------------MSEGRRL-------------------------------------------------------------------------------------------------------------------------WLEEE-----------------LQD-DLKWS--------------VQVKSILYQGASKFQDIELIE---SG-PFGKLLMLDGKAQSAEADEFVYHESLVHPALL--SHPN-PK----------------------K-----IFIMGGGEGSTAREALRHKS-----VEKVVMVDIDQVVVEFCRDYLPA----NKE------A-FE--D---PRLEVLYND------------------ALVELERS-----------TEQFDVIIGDLAD-P--V-EGG-----P-CYKLYT--KDFYEKILKPKLA-PGGIIVTQGGPAGILSYKLVYSSIHN--TLAQV-F---------------K-HTLPYA-THVPSFA--------------DQWG--WIM----ASD----------E---P---------------------LK--E-----P--------VV--------ADL----D---AAI-------------AKRIN-G---E----LGYLDG-RTLQAEMALSKAV-RK---GLAAETH----VYT----EDDAR-----------FIH---GSGIVNGH*----------------------------------------------------------------------------------------------------------------------
>KIIX_scaffold_2009576_Pilularia_globulifera
----------------------------------------------------------------------------------------------------------------------MATPKAFPDDELTLTLASQQASVVDSSSAAPAPADLASPLKRLRSDNNNNNNNGC---------------------------------VTPADFSLASAPASMETIKPGSGRANIST----------------------VIPG-------------------------------------------------------------------------WFSEI---------------------SPMWP------G---EAHSLQVEKILFEGKSDFQDVLVFQ---SA-TYGKVLVLDGVIQLTERDECAYQEMITHLPLC--SIPN-PR----------------------K-----VLVIGGGDGGVLREVARHKS-----VEQIDICEIDKMVIDVAKEYFPE----VAV------G-YD--D---PRVKLFVGD------------------GAAFLKDV----------PEGFYDAVIVDSSD-P--I---G-----P-AQQLFE--KPFFESLARA-LR-PGGVVCTQA--ESIWLHLHIIQDIFA--ACKQT-F---------------K-GSVSYAWTSVPTYP---------S----GVIG--FML----CST---------AG---P----------DVN--------FR--D-----P--------LN---------LI----E---KVE------------AANSEEDKKSKP----LKFYNS-ELHRAAFALPQFA-RN---ALETYLT------------PNP*------------------------------------------------------------------------------------------------------------------------------------------------
>KIIX_scaffold_2089354_Pilularia_globulifera
----------------------------------------------------------------------------------------------------------------------------------------------------MATCTAVDSGGGSVPVKQVKWPSDY--------------------------------CCPDNVDR-AVLFAS---AKPGTGRANLSRG---------------------GADG-------------------------------------------------------------------------WYSEI---------------------NPLWH------G---EAHSLKVEKVLFEGKSDYQDILVFQ---SA-SYGKVLVLDGVIQLTERDECAYQEMITHLPLS--SIPC-PR----------------------K-----VLVIGGGDGGVLREISRHKS-----VEHIDICEIDKMVIDVSKEFFPH----LAV------G-YD--D---PRVNLFVGD------------------GLAFLRDS----------AEGFYDAVIVDSSD-P--I---G-----P-AQQLFE--KPFFELVKRA-LR-PGGVLCSQT--ESLWLHMHTIQDIIS--VARQT-F---------------SGGSVKYAWTSVPTYP---------S----GVIG--LML----CST---------KG---P----------AVD--------FC--N-----P--------VN---------PI----D---KLE------------PESDSSNGHRQP----LKFYNS-EMHKAALCLPQFV-RL---QLEP*------------------------------------------------------------------------------------------------------------------------------------------------------------------
>KIIX_scaffold_2090171_Pilularia_globulifera
----------------------------------------------------------------------------------------------------------------------MATETACFVTSSRPAAPYISTAAAAAAAVPSRDLAPFTLAAPTANCCSNGAAGGNYVVNGNGNGLILYPATANSASGCDTTATPSVHSLAYLSAAGIAMNPAPATHTQLNRPASCNNILSNNGNGHVASCVNIVKSGSESCDG---------------GKTTSVQTKSNGSNRLNNITDDYPPAPILTVKCNNGYLDDLQEASTEAPASPRRRPTLWYEEE-----------------IDD-SLRWC--------------FGLISILHTGVSKYQEIALLD---TQ-PFGKVLTLDRKMQSAEIDEWVYHECLVHPALL--HHQS-PK----------------------T-----VFIMGGGEGSTAREILRHKS-----IRKVVMCDIDEEVVKFCSTHLTV----NYD------A-FR--S---SRLELVIND------------------ARAELVSR----------HGEQFDVIIGDLAD-P--L-ECG-----P-CYQLYS--KVFYETVVKPRLS-LGGIFVTQAGPAGVLSHKEVFTSIFN--TLKQV-F---------------A-YVVAYS-AHVPSYA--------------DTWG--WVM----ASD----------K---P---------------------FD--Q----VP--------AT---------EI----D---MRI-------------RKHVI-G---E----LRYLDG-KTMHASTMLNKVV-RQ---SLANEKH----VYT----EDSAR-----------FIY---GHGQNKRGH*---------------------------------------------------------------------------------------------------------------------
>KRUQ_scaffold_2006284_Porella_navicularis
----------------------------------------------------------------------------------------------------------------------------------------MTEAITTTTTIHLNGSGPTPKGTIVAVGSKRYHMGDS---------------------------------IPTPHSN-GSSNGSAMHVNGSAGKKNSNV----------------------FAKN------------------------------------------------------------------AGGKRCLWFEEE-----------------IEE-DLRWV--------------FGVSKILHTGVSEFQDIQLVE---SG-PFGKVLLLDGKLQSAEADEFVYHESIVHPACL--CHTN-PR----------------------T-----VFIMGGGEGSTAREALRHRS-----VKKVVMCDIDKEVVDFCREHLTA----NAE------A-FR--S---RRLELVIDC------------------ARAELERR-----------EEQFDIIIGDLAD-P--V-DGG-----P-CYRLYT--QSFYERVLKPKLA-PGGILVTQGGPAGILSHKEVYTSIYN--TLHQV-F---------------K-YVVPYA-AHVPSYA--------------DTWG--WVM----ASD----------H-PIP--------------------SFS-----------------VD---------ET----D---SRI-------------SQKVS-G---E----LRFLDG-ATLAATFALNKHV-RT---SLERETH----VYT----EETAR-----------FVH---GHGTAQKH*----------------------------------------------------------------------------------------------------------------------
>KRUQ_scaffold_2112737_Porella_navicularis
---------------------------------------------------------------------------------------------------------------------------MCSSIAASRVFRRLLPSLSVYPRAIEPCCLKPIRTETHSGSLKGRRSQGS--------------------REALREGEGERGLRGRVGMA--TPAGG---DGAGAKKTNFGS----------------------VMKG-------------------------------------------------------------------------WFSEI---------------------GPMWP------G---EAHSLKVEKQLFEGQSDFQHVQVFQ---SE-SYGKVLVLDGVIQLTERDEFSYQEMIAHLPLC--SVPD-PK----------------------K-----VLVIGGGDGGVLREVSRHTS-----VEHVDICEIDKMVVDVSKEFFPG----VAI------G-FQ--D---PRVNVHIGD------------------GVKFLQEA----------TAKSYDVIIVDSSD-P--I---G-----P-AEGLFQ--KPFYESLARA-LR-PGGVACTQA--ESIWLHLPIIKEVVT--INSSI-F---------------K-GSINYAWTSVPTYP---------S----GVIG--FML----CST---------EG---P----------AVN--------FS--K-----P--------VN---------QI----E---NFA-----------STDESLK-LVKGP----LKYYNS-QVHAAALVLPQFV-RE---TLGNLLT----SYS*--------------------------------------------------------------------------------------------------------------------------------------------------------
>KSFK_scaffold_2004908_Chlorosarcinopsis_halophila
-------------------------------------------------------------------------------------------------------------------------------------------------------------------------------------------------------------------------------MAEESSRRI------------------------------------------------------------------------------------------------------WLEED-----------------LSD-DLRWS--------------IGLKSILAAGQSEFQAYELVD---SL-PFGKILMLDGKAQSAEVDEYAYHECLVQPAML--LHGN-PK----------------------T-----VFICGGGEGSTAREVLRHAS-----VEKCVMVDIDKKVCDFCEQHLTA----NTA------A-FR--D---PRLELINDD------------------ARAQLENY-----------AGTFDIIIGDLAD-P--V-FGG-----P-CYQLYT--DDFYKNVVSQKLN-PGGIFVTQSGPCGLLSVSEVFTSIHN--TLKAS-F---------------P-KVIPYC-CHIPSFA--------------DEWG--WNL----AVK---------DG---D---------------------LD--A-----S--------SA---------QL----D---AKI-------------EERVQGG--------LRFLDG-MTWQRMTTLSKPV-RA---AIASDKH----ILS----VDNPR-----------FIY---GQGVKTLV*----------------------------------------------------------------------------------------------------------------------
>KUJU_scaffold_2006868_Gonium_pectorale
-------------------------------------------------------------------------------------------------------------------------------------------------------------------------------------------------------------------------------MASYAKRL-------------------------------------------------------------------------------------------------------WLEEE-----------------LGD-DYRWS--------------YRVSTVLFSGRSPYQEVDLVD---TP-TWGKVLLLDGKMQSAEADEQVYHELLVHPPLL--HHHS-PK----------------------R-----VFIMGGGEGATAREVLRHTS-----VEQVVMADIDKVVTDFCSQHLER----NVA------A-FN--D---PRLKLVNDD------------------ARVQLEAA----------ADASFDVIISDLAD-P--L-DGG-----P-CYQLYT--QEFYRSVVLRKLA-PGGIFVTQSGPAGFLSCREVFTSIHA--TLRSV-F---------------P-TVVAYA-QHIPSFC--------------DVWG--YNM---------------------T---------------------FR--D--------------AD---------QV----PLTDEQM-------------DSRIASRLACS----LSFLDG-VTFAGLRQLNKVV-RA---AMAGETM----VYT----VDNAR-----------FIH---GTGMTASIS*---------------------------------------------------------------------------------------------------------------------
>KYIO_scaffold_2036526_Mesostigma_viride
-----------------------------------------------------------------------------------------------------------------------------------------------------------MGEDAPTKRSRDTGEETA--------------------------------------------------QAPLGDASGLGA----------------------LKEG-------------------------------------------------------------------------WFAEL---------------------SELWP------G---MAMSLEVKEMLFREQSKFQDVLVFE---SA-SFGRVLVLDGAIQVTDRDECSYQEMITHLPLC--CVPE-PK----------------------H-----VLVIGGGDGGVLREVCRHPS-----VERVDICELDEMVINVSKKYFPK----TAV------G-YE--D---PRVAVHVAD------------------GIEFIRKS----------PDCSYDCIIVDSSD-P--I---G-----P-AEALFG--LPFYQDVARV-LK-VGGVMSNQG--ESLWLHLDLIKKMVT--KCSQA-F---------------D-GSIQYAYTTIPTYP---------S----GQIG--FML----CSK---------GK---P-----------VD--------FK--N-----P--------CR---------AI----P---EEA-------------AKGHKGGNGEADVVPLRYYTP-DVHRSAFVLPKFA-AD---ELCGVLR--------------D*------------------------------------------------------------------------------------------------------------------------------------------------
>KYIO_scaffold_2036815_Mesostigma_viride
------------------------------------------------------------------------------------------------------------------------------------------MVDCAASCFTFSVRLTSPSHVKARVRPKLSRSLPT---------------------------------STISPPKLRKTFSPAKPLTVSMAGGNL-----------------------------------------------------------------------------------------------------WCEEE-----------------IET-NLKWC--------------YSIIDILATKVSKFQDISLIK---SG-PFGKVLLLDGKLQSTECDEYAYHESLVHPAML--HHPN-PK----------------------T-----VFILGGGEGFTAREVLKHPS-----VEKCVMCDIDQDVVDFCKEHLDV----NKE------A-FA--D---PRLELIIDD------------------AKAELANS-----------PRCYDVIIADLAD-P--V-DAG-----P-CFNLYT--EEFYEQVLRPRLN-PGGIFVTQSGPAGILSHKEIFTPIYK--TMEAV-F---------------A-RVIPYA-VHLPSFA--------------DQWG--FNM----SLP---------VG-MEP---------------------LT--E-----A-------------------EL----D---ARA-------------AERISAE--------LGHLDG-KTWLAMSYLTKKI-RK---SLSEETT----VYR----EGHAP-----------AIY---GHGIGNA*-----------------------------------------------------------------------------------------------------------------------
>LGOW_scaffold_2005003_Schistochila_sp.
-------------------------------------------------------------------------------------------------------------------------------------------------------------------MGEKTRNISV---------------------------------TGMYANL--DSKSE---HGVVLLRGDFGD----------------------------------------------------------------------------------------------------FTSD---------------------HPAFL------FDAGEAHSLKVEKQLFEGQSDYQHVQVFQ---SE-SYGKVLVLDGVIQLTERDEFSYQEMITHLPLC--SVSE-PK----------------------K-----VLVIGGGDGGVLREVSRHTS-----VESIDICEIDKMVVDVSKEFFPT----VAV------G-FE--D---PRVKVHIGD------------------GVKFLQDA----------EAQTYDVIIVDSSD-P--I---G-----P-AEGLFQ--RPFYVSLARA-LR-PGGVACTQA--ESIWLHLPIIKEVVT--INSSI-F---------------K-GSVNYAWTSVPTYP---------S----GVIG--FML----CST---------AG---P--------------AVN----FS--K-----P--------VN---------PI----E---SFA-----------SSEESLK-LVKAP----LKYYNS-QVHSAALILPQFA-QE---SLEGLLT----SYS*--------------------------------------------------------------------------------------------------------------------------------------------------------
>LGOW_scaffold_2016515_Schistochila_sp.
----------------------------------------------------------------------------------------------------------------------------------------------------------------------------------------------------------------------------------------------------------------------------------------------------------------------------------------------------------------------------------------------------------------------------------QCTERDEFSYQEMITHLAMF--SHPN-PK----------------------K-----VLVIGGGDGGVLREVIKHDS-----VEEATLCDIDEAVIRLSKKYLPD----MAV------S-YQ--H---PKVKVHIGD------------------GFKFLEDY-----------KDSFDVIITDSSD-P--E---G-----P-AESLFQ--KPYFQLLFGA-LK-EGGVITTQA--ENQWLHLPLITKLKK--DCKEV-F-----------------PNVEYAYTTIPTYP---------S----GQIG--FMV----CCK---------DA-KRD---------------------LS--T-----P--------VR---------SFTPAEE---EKV----------------------------FRYYNK-DIHSAAFVLPTFA-KT---ALR*-------------------------------------------------------------------------------------------------------------------------------------------------------------------
>LGOW_scaffold_2104264_Schistochila_sp.
-----------------------------------------------------------------------------------------------------------------------------------------MTEAITTTTTIHINGSGPAKGTIVAVGSKRYHMGDS---------------------------------TLHSNGA-AMHLNG---SAGPGKKSGFNK-------------------------------------------------------------------------------------------NAGSKRCLWFEEE-----------------LEE-DLRWV--------------FGVSKILHTGISQYQDIELVE---SG-PFGKVLLLDGKLQSAEADEFVYHESIVHPACL--YHNN-PR----------------------T-----VFIMGGGEGSTAREALKHKS-----VKKVVMCDIDKEVVDFCREHLIA----NAD------A-FR--N---RRLELVIDC------------------ARAELERR-----------EEMFDIIIGDLAD-P--V-DGG-----P-CYRLYT--QSFYEGVLKPKLA-PGGIFVTQGGPAGILSHKEVYSSIYN--TLRQV-F---------------K-YVVPYA-AHVPSYA--------------DTWG--WVM----ASD----------H---P---------------------FP--------P------FSVD---------DT----D---ARI-------------TQRVQ-G---E----LRFLDG-ATMAATFALNKHV-RN---SLYKETH----VYT----EETAR-----------FIH---GHGTAQKH*----------------------------------------------------------------------------------------------------------------------
>LNSF_scaffold_2002727_Hypnum_subimponens_74
-----------------------------------------------------------------------------------------------------------------------------------------------------------------MVESNGAYVNGP-----------------------------------SLPSP-VASTKAAVAAEPELKKRCL-----------------------------------------------------------------------------------------------------WFEEE-----------------LEE-DLRWV--------------FGVSKILHTGVSEFQDIELVE---SG-PFGKVLILDGKLQSAEADEFVYHESIVHPALL--YHPN-PK----------------------N-----VFIMGGGEGSTAREALRHRS-----VEKVVMCDIDEEVVNFCRKYLTV----NAE------A-FC--S---SRLDLVINC------------------ARAELENK-----------TEQFDIIIGDLAD-P--V-AGG-----P-CYQLYT--KSFYKYILKPRLK-EGGILVTQGGPAGILSHTEVYSSIYN--TLRET-F---------------K-YVVPYA-AHVPSYA--------------DTWG--WIM----ASD------------------------------------LP--I-----P-----TISAE---------ET----D---SRV-------------KQRID-G---E----LKFLDG-QTLSATMVLNKHV-RQ---SLAKERH----VYT----EETAR-----------FIH---GHGTAVKN*----------------------------------------------------------------------------------------------------------------------
>LNSF_scaffold_2066571_Hypnum_subimponens
--------------------------------------------------------------------------------------------------------------------------------------------------------MAMAEGESRNAAELIAQDNAA--------------------------------------------------PAPSTARANLSN----------------------IMPG-------------------------------------------------------------------------WFSEI---------------------SPMWP------G---EAHSLKVEKFLFEGKSDYQDVVVFE---SA-TYGRVLVLDGVIQLTQRDECAYQEMITHLPLC--SIPN-PK----------------------K-----VLVVGGGDGGVLREVSRHTS-----IEQIDICEIDKMVVDVAKEFFPD----VAI------G-FD--D---PRVNLHIGD------------------GVAFLREV----------PEGTYDAIVVDSSD-P--V---G-----P-AQALFE--RPFYKSLDRA-LR-PGGVICTQA--ESLWLHMPIIKDIVA--ACGHT-F---------------K-GSINYAWTSVPTYP---------S----GVIG--FML----CSS---------AG---P----------FVN--------FR--E-----P--------CN---------PI----D---KAV-------------DTKLSSR--RP----LKFYNS-AMHAAAFSLPQFA-KE---ELEHLLT----------PPPSS*------------------------------------------------------------------------------------------------------------------------------------------------
>LNSF_scaffold_2069956_Hypnum_subimponens_76
--------------------------------------------------------------------------------------------------------------------------------------------------------MVKGESNGVHVANGTLHQSSS---------------------------------AAAKPTL--IVTRT---PSPPPSTVVEPR-----------------------------------------------------------------------------------------------QRCLWFEEE-----------------LEQ-DLRWV--------------FGVSKILHTGVSEFQNIELVE---SG-PFGKVLILDGKLQSAEADEFVYHESIVHPALL--YHSN-PK----------------------N-----VFIMGGGEGSTAREALKHRS-----VEEVVMCDIDEEVVNFCRKHLTV----NAE------A-FR--S---DRLELVINC------------------ARAELEKR-----------TEQFDIIIGDLAD-P--V-AGG-----P-CYQLYT--KSFYESILKPRLK-EGGILVTQGGPAGILSHTEVYSSIYN--TLRET-F---------------K-HVVPYA-AHVPSYA--------------DTWG--WVM----ASD----------A---P---------------------LS--------P--------IS---------P-----EETDSRI-------------NRRID-G---E----LQFLDG-QTLSASIALNKHV-RK------RYT*----------------------------------------------------------------------------------------------------------------------------------------------------------------
>Macuminata|GSMUA_Achr1G19050_001
-----------------------------------------------------------------------------------------------------------------------------------------------MSVLHSNVYPRCLCSNSNALVLQLISSEIM---------------------------------TIDDSHN-KLSSCH---VNGGLTNDGLSA----------------------IMPG-------------------------------------------------------------------------WFSEI---------------------NPMWP------G---EAHSLKVEKVLFQGKSDFQNVVVFQ---SS-TYGKVLVLDGVIQLTERDECAYQEMITHIPLC--SILN-PK----------------------K-----VLVIGGGDGGVLREVSRYSS-----VEQIDICEIDKMVIDVSKEFFPN----MAV------G-YE--D---PRVTLHVGD------------------GVAFLKNV----------PEGTYDAIIVDSSD-P--I---G-----P-AKELFE--KPFFESVANA-LR-PGGVVCTQA--ESIWLHMHIIEDIVS--NCRQV-F---------------K-GSVSYAWTTVPTYP-RHEQIYIFSYFEHGVIG--FML----CST---------EG--PP-----------VD--------FQ--H-----P--------VY---------NM----D---EAE-------------NSNKSVG---P----LKFYNS-EIHSAAFCLPSFA-RR---VIDS*------------------------------------------------------------------------------------------------------------------------------------------------------------------
>Macuminata|GSMUA_Achr2G05380_001
---------------------------------------------------------------------------------------------------------------------------------------------MELEGGMAAVGEEEEEEAAAAKKRARPSEEVD---------------------------------GECQSDG-VPEAPS---AEHGKPADGVSS----------------------VIPG-------------------------------------------------------------------------WFSEI---------------------SPLWP------G---EAHSLKVEKVLFQGKSDYQNVMVFQ---SS-TYGRVLVLDGVIQVTERDECAYQEMITHLPLC--SIPN-PK----------------------K-----VLVIGGGDGGVLREVSRYSS-----VEQIDICEIDKMVVDVSKQFFPH----LAV------G-YE--D---PRVTLHIGD------------------GVAFIKGV----------PEGTYDAVIVDSSD-P--I---G-----P-AQELFE--KPFFESIAKV-LR-PGGVLCTQA--ESIWLHMQLIEGILS--ACRQV-F---------------K-GSVNYAWTTVPTYP---------S----GVIG--FML----CST---------EG--PP-----------VD--------FQ--H-----P--------VN---------HI----D---EDE-------------VSKKSKG---P----LKFYNS-EIHSAAFCLPSFA-KR---IIGSEAH*---------------------------------------------------------------------------------------------------------------------------------------------------------------
>Macuminata|GSMUA_Achr3G07920_001
-------------------------------------------------------------------------------------------------------------------------------------------------------------MGEAVENVYGTNAHGD--------------------------------------------------CHRAKDGGDACK---------------------------------------------------------------------------------------------------WYEEE-----------------IDD-DLKWC--------------FALNSVLHRGTSKFQDIALID---TK-HFGKALVIDGKMQSAEMDEFIYHECLIHPSLL--CHPN-PK----------------------T-----VFIMGGGEGSAAREVLKHKT-----IQRAVMCDIDEEVVDFCRRYLTV----NCE------A-FA--S---DKLCLVIND------------------ARAELEKR-----------EEKYDIIVGDLAD-P--V-EGG-----P-CYQLYT--KSFYEQVLKPKLH-HHGIFVTQAGPAGVLTHKEVFSSIYN--TLKHV-F---------------K-HVLAYT-AHVPSFA--------------DTWG--WVM----ASD----------Q---P---------------------IM--L-----D--------AQ---------QI----D---ERI-------------GKRIN-G---E----LLYLNG-ESLVSSTTMNKSV-YT---SLLKETH----IYT----EESAR-----------FIY---GHGRACFA*----------------------------------------------------------------------------------------------------------------------
>Macuminata|GSMUA_Achr4G06190_001
---------------------------------------------------------------------------------------------------------------------------------------------MKSHTSQGLSRTNSRGVGMEVGGCAAATERPK---------------------------------ASEEGNG--NAEPA---VPHEKKMNGISA----------------------VIPG-------------------------------------------------------------------------WFSEL---------------------SPMWP------G---EAHSLKVEKILFQGKSDYQNVLVFQ---SS-TYGKVLVLDGVIQVAERDECAYQEMITHLPLC--SISN-PK----------------------K-----VLVIGGGDGGVLREVSRYTS-----VEQIDICEIDKMVVDVSKQFFPH----LAV------G-YE--D---PRVTLHIGD------------------GVAFLKDA----------PEGTYDAVIVDSSD-P--I---G-----P-AQELFE--KPFFQSVAKA-LR-PGGVVCTQA--ESIWLHMHIIEGIVS--ACCQI-F---------------K-GSVNYAWTTVPTYP--------------RHVH-------------------------------------------------------------------VD--------------------------------------------------FIFL---------WALSS*------------------------------------------------------------------------------------------------------------------------------------------------------------------------------
>Macuminata|GSMUA_Achr4G15690_001
-------------------------------------------------------------------------------------------------------------------------------MQLILPINTLPFSAPHQSEALGRGWKPQGGGTGSMAGDGAGNGSDA---------------------------------RRTPEEEFPPCCRKARASAPESEAKCHET----------------------VVSG-------------------------------------------------------------------------WFSNS--------SLSDKDGKFMYFNNPMWP------G---EAHSLKVEKILYQGKSEFQEILVFQ---SS-MYGKVLVLDGIVQLTERDECAYQEMIAHLPLC--SIPS-PK----------------------T-----VLVIGGGDGGVLREIARHSS-----VEHIDICEIDKMVIDVCKQFFPD----LSV------G-FD--D---PRVRLHVAD------------------GIKFLRDA----------PEAMYDVIIVDSSD-P--I---G-----P-ARELVE--KPFFEMIARA-LK-PGGVLCNQA--ESMWLHTHLIQDMLS--ICREI-F-----------------KSVHYAWASVPTYP---------S----GVIG--FLL----CST---------NG---P----------PVH--------FL--N-----P--------IN---------PI----D---KQE-------------ALKCKRE--------LRFYNS-EMHKAAFVLPSFA-KK---ELSSFLS----------SPLTV*------------------------------------------------------------------------------------------------------------------------------------------------
>Macuminata|GSMUA_Achr7G07530_001
-----------------------------------------------------------------------------------------------------------------------------------------------------------------MGDISSSNGNGS--------------------------------------------------GLLGDGRRKSC----------------------------------------------------------------------------------------------------WYEEE-----------------IEQ-NLRWC--------------FALNSILHTGSSQYQDIALLD---TK-PFGKALVLDGKLQSAEMDEFIYHESLVHPALL--HHQN-PK----------------------H-----IFIMGGGEGSTAREILRHRT-----VERVVMCDIDQEVVDFCKSHLLA----NKE------A-FF--D---PRLHVVIND------------------ARAELEKR-----------KDKFDVIVGDLAD-P--I-EGG-----P-CYKLYT--KSFYEETLKPRLN-QGGIFVTQAGPAGVFSHTEVFSCIYN--TLRHV-F---------------R-YVVPYS-AHIPSYA--------------DTWG--WVM----ASD----------S---P---------------------FT--L-----D--------AE---------KL----D---SRI-------------RQRIE-G---E----NRYVDG-ETFASASILSKAV-RK---SLAKETQ----LYT----EGTAK-----------FIY---GHGNCTNIAST*-------------------------------------------------------------------------------------------------------------------
>Macuminata|GSMUA_Achr8G25030_001
-----------------------------------------------------------------------------------------------------------------------------------------MKGPQTGVAAALDIGSSSPSFTLNRKPSRVLVPGGA---------------------------------PKRGNDV--NRGRKARASAPESEATCHET----------------------VVSG-------------------------------------------------------------------------WFSKP---------LSDTDGELVYFNNPMWP--------GREAHSLKVEKILYQGKSEFQEILVFE---SS-MYGKVLALDGIVQLTERDECAYQEMIAHLPLC--SIPS-PK----------------------T-----VLVLGGGDGGVLREIARHSS-----VEHIDICEIDKMVIDVCKKFFPD----LSV------G-FE--D---PRVHLHIDD------------------AVKFIRDT----------PEGMYDAIIVDSSD-P--I---G-----P-ARELVE--KPFFEIIARA-LR-PGGVLCNQA--ESMWLHTHLIQEMLS--ICRET-F-----------------STVHYAWASVPTYP---------S----GVIG--FLL----CST---------NG---P----------PVN--------FL--N-----P--------IN---------PI----D---KQE-------------VVKYK-----E----LKFYNS-EIHKAAFALPAFA-KR---ELSSFLS------------TPLR-----------YI*----------------------------------------------------------------------------------------------------------------------------------
>Mapoly0012s0100|MpACL5
-----------------------------------------------------------------------------------------------------------------------------------------MAEAITTTTTIHLNGSAPTKGSIVNVGSKRYHMGDT---------------------------------APITTPK--AANGT---SAPKKAVNGVSA---------------------------------------------------------------------------------------------SNKSCLWFEEE-----------------LEE-DLRWV--------------FGVSKILHTGVSEFQDIQLVE---SG-PFGKVLILDGKLQSAEADEFVYHESIIHPAML--YHKD-PK----------------------N-----VFIMGGGEGSTAREALRHKS-----AKKVVMCDIDKEVVDFCREHLSV----NSE------A-FK--S---RRLELVIAD------------------ARAELERR-----------EETFDIIIGDLAD-P--V-DGG-----P-CYRLYT--QSFYESVLKPRLA-PGGILVTQAGPAGILTHTEVFTSIYN--TLRQV-F---------------K-YVVPYA-AHIPSYA--------------DSWG--WVM----ASD----------H---P---------------------FP--A-----F--------ND--------EET----D---SRI-------------SKRLT-G---D----LQFLDG-TTMSALFALNKHV-RK---SLAQESH----VYT----EETAR-----------FIH---GHG-TNAK-SH*-------------------------------------------------------------------------------------------------------------------
>Mapoly0038s0069.1
------------------------------------------------------------------------------------------------------------------MRQRNLAIVAALQSTFTCLFRSSSQLPFRKDIRRFGSSSLFALSIFSQSTRRNRIVTGA---------------------------------LSKGRFRVDSVGMAPGGDTPAPTPSNMGS----------------------IMPG-------------------------------------------------------------------------WFSEI---------------------GSMWP------G---EAHSLKVEKSLFDGQSDFQHVQVFQ---SE-TYGKVLVLDGVIQLTERDEFSYQEMITHLPMC--SVTD-PK----------------------R-----VLVIGGGDGGVLRELSRHSS-----VERIDMCEIDKMVVEVSKEFFPN----VSI------G-FQ--D---PRVNLVIGD------------------GVKFLQEA----------DTGTYDVIIVDSSD-P--V---G-----P-AEGLFQ--KPFYESLARA-LR-PGGVACTQA--ESIWLHLPIIKEVVS--ICSGI-F---------------T-GSVNYAWTSVPTYP---------S----GVIG--FML----CST---------EG---P---------TKVN--------FK--K-----P--------VN---------PI----E---GIV---------------TGEAAKSRL----MKYYNS-EVHEAAFILPQFA-KS---FLQDSLS--------------T*------------------------------------------------------------------------------------------------------------------------------------------------
>MCHJ_scaffold_2007533_Micrasterias_fimbriata
----------------------------------------------------------------------------------------------------------------------------------------------------------------MAQQEEGGKFQGE---------------------------------------------------TQGTARANMDS----------------------VMKG-------------------------------------------------------------------------WFSEV---------------------SPMWP------G---EAHSLKIEEVLFEGKSDFQDVAIFR---SE-TYGKVLVLDGVIQLTERDECAYQEMITHVPLC--SIPN-PK----------------------R-----VLVVGGGDGGVLREVSRHVG-----VERIDIVEIDGMVIDVSKEHFPQ----VAV------G-YA--D---PRVHVTVGD------------------GVAFLRDA----------EEGTYDAIIVDSSD-P--I---G-----P-AKQLFE--RPFFLSMARA-LR-PGGVVCTQA--ESLWLHLPIIKEIAQ--ACKHS-F---------------G-GSVNYAWTSVPTYP---------S----GTIG--FMV----CST---------PG---P----------AVN--------FK--Q-----P--------IN---------RI----E---DQP-------------PRPEHLPQLPP----LKYYNS-GIHSAAFVLPQFA-KE---ALDEYLT--------------E*------------------------------------------------------------------------------------------------------------------------------------------------
>MCHJ_scaffold_2064218_Micrasterias_fimbriata
---------------------------------------------------------------------------------------------------------------------------------------------------------------------------------------------------------------------------------------------------------------------------------------------------------------------------------------------MWFEEE-----------------LQE-DLRWV--------------FGVTSIIHKEVSEFQDMELLE---TG-LFGKVLVLDGSLQSAEADEFVYHESLVHTALL--HHPN-PR----------------------T-----VFIMGGGEGSTARETLKHQS-----VERVDMCDIDKVVVDFCREHLTA----NSE------T-FR--N---PKLNLIIND------------------ARDELEQG--------VHRAQGYDVIVGDLPD-P--V-EGG-----P-CYTLYT--ESFFRDILKPRLN-HDGILVTQAGPAGILSAAEVYTPIYN--TLRQV-F---------------K-YVIPYT-AHVPSYA--------------DTWG--WIM----ASD----------S-PLP---------------------KL--T--------------AD---------GV----D---HRI-------------TERVR-G---E----LRFLDG-CTLLASMALNKHL-RA---LLANETI----VYT----EESPL-----------FLH---GQGTQSYHDKITQ*-----------------------------------------------------------------------------------------------------------------
>Mesculenta|Manes.03G052500
---------------------------------------------------------------------------------------------------------------------------------------------------------------MGEAVEIIYTTNGF--------------------------------------------------SKLCTQNHDQSS---------------------------------------------------------------------------------------------------WYEET-----------------IDD-DLRWS--------------FALNRVLHKGTSQFQDIALLD---TK-RFGKVLVIDGKMQSAEVDEFIYHECLIHPALL--CHPI-PR----------------------N-----VFIMGGGEGSAAREALKHKL-----VEKVVMCDIDQEVVNFCRTYLTA----NQD------A-FR--N---KKLDLVIND------------------AKAELEKR-----------IDKFDIIVGDLAD-P--V-EGG-----P-CYQLYT--KSFYEKILKPKLN-NNGIFVTQAGPAGIFTHKEVFSSIYN--TVKQV-F---------------Q-YVVAYS-AHVPSFA--------------DTWG--WVM----ASD----------Q---P---------------------FS-----------------ID-------AVEI----D---RRI-------------EERIE-G---E----LLYLNG-AAFLSSATLNKTV-SL---SLLNETH----VYT----EDDAR-----------FIP---GHGLACRN*----------------------------------------------------------------------------------------------------------------------
>Mesculenta|Manes.06G103200
--------------------------------------------------------------------------------------------------------------------------------------------------MAAENGVASSDHESHTTQVQKIDQIAT---------------------------------RLLSSPP--ILEME---NLHKASSNGVSF----------------------NIPG-------------------------------------------------------------------------WYADV---------------------ALSWP------G---EAHLYEMEKVLFHGKSEYHDLFVFQ---SS-SHGKIVILNGDMQLTEKDEFVYQEMLTHLPLC--SIPN-PK----------------------K-----VLLIGGGDGGILREISRHYS-----VDRIDICELDKMVIDAYKRFFPD----IAI------G-YN--D---PRVNVYIGN------------------GVEFLKNV----------PQATYDVIILDAFH-C--I---G-----PVEEEVGE--KSFLESVAGA-LR-PGGVLGCPA--ESLWNAEFSLSNSIA--KCREA-F---------------K-GSVNYAWCTTPAYA---------S----GMIG--FML----CST---------EG---P----------PVD--------FK--H-----P--------VN---------PL----N---PEN-------------YGVAK-G---P----PRFYNS-EVHTAAFSLPSFA-KK---MFGSKIL-----------STYE*------------------------------------------------------------------------------------------------------------------------------------------------
>Mesculenta|Manes.06G158700
----------------------------------------------------------------------------------------------------------------------------------------------------MEDSAGRGFEYQKIMDDKVNNGNGS---------------------------------ERAIPSCCLKARA----SAPELDVKCHST----------------------VVSG-------------------------------------------------------------------------WFSES-------HFSSGKARKRVYFNNPMWP------G---EAHSLEVKNILYKGKSDYQEILVFE---SS-TYGKVLVLDGIVQLTEKDECAYQEMIAHLPLC--SIPS-PK----------------------S-----VLVVGGGDGGVLREISRHGS-----VELIDICEIDKMVIDVCKEYFPE----LSV------G-FE--D---PRVRLHVGD------------------AVEFLQLA----------PEGKYDAVIVDSSD-P--V---G-----P-AQELVE--KPFFQTIAKA-LR-PGGVLCNMT--ESMWLHTHLIDDMIS--ICREI-F---------------K-GSVHYAWASVPTYP---------S----GVIG--FLI----CST---------EG---P----------LVD--------FL--N-----P--------VN---------PI--------EKL-------------KGAVKNK--RE----LRFYNS-EIHSAAFALPTFL-KR---EVRLLRH----SPKLARGIHIP*------------------------------------------------------------------------------------------------------------------------------------------------
>Mesculenta|Manes.12G030300
------------------------------------------------------------------------------------------------------------------------------------------------------MAEEGLAVSNDLAVKKPREDEAN---------------------------------GVSATTVSMETEGN---TDNKSNNDYISS----------------------VIPG-------------------------------------------------------------------------WFSEI---------------------SPMWP------G---EAHSLKVEKILFQGKSDYQNVMVFQ---SS-TYGKVLVLDGVIQLTQRDECAYQEMITHLPLC--SIPN-PK----------------------K-----VLVIGGGDGGVLREVARHSS-----VEQIDICEIDKMVVDVSKEFFPD----VAV------G-YV--D---PRVTLHVGD------------------GVAFLKDV----------PAGTYDAIIVDSSD-P--I---G-----P-AQELFE--KPFFESVAKA-LR-PGGVVCTQA--ESIWLHMHIIEDIVA--NCRQI-F---------------K-GSVNYAWTTVPTYP---------S----GVIG--FML----CST---------EG---P----------PVD--------FK--H-----P--------VN---------AI----D---AYD-------------GKSTT-----P----LKFYNS-EIHTAAFCLPSFA-KK---VIDSKAK---------------*------------------------------------------------------------------------------------------------------------------------------------------------
>Mesculenta|Manes.13G031400
-------------------------------------------------------------------------------------------------------------------------------------------------------MAEEGVAVSNDLPVKRPREDGE----------------------------------NVPSPTTVVMETEGNAENNNSNNDHISS----------------------VIPG-------------------------------------------------------------------------WFSEI---------------------SPMWP------G---EAHSLKVEKILFQGKSDYQNVMVFQ---SS-TYGKVLVLDGVIQLTERDECAYQEMITHLPLC--SIPN-PK----------------------K-----VLVIGGGDGGVLREVARHSS-----VEQIVICEIDQMVVDVSKEFFPD----IAV------G-YE--D---PRVTLHVGD------------------GVAFLKDV----------PAGTYDAIIVDSSD-P--I---G-----P-AKELFE--KPFFESVAKA-LR-PGGVVCTQA--ESIWLHMHLIEDIVA--NCRQV-F---------------K-GSVNYAWTTVPTYP---------S----GVIG--FML----CST---------EG---P----------AVD--------FK--H-----P--------VN---------PI----D---ADD-------------DNSRR-----P----MKFYNS-EIHTAAFCLPSFA-KK---VIDSKAK---------------*------------------------------------------------------------------------------------------------------------------------------------------------
>Mesculenta|Manes.14G017500
----------------------------------------------------------------------------------------------------------------------------------------------------MEDGAGRGLECQKIMDGKVNNGNSS---------------------------------EKAIPSC-CLKARA---SAPELDAKCHST----------------------VVSG-------------------------------------------------------------------------WFSES-------YSCSGTGSKRVYFNNPMWP------G---EAHSLEAKNILYEGKSEYQEILVFE---SS-AYGKVLVLDGIVQLTEKDECAYQEMIAHLPLC--SIPS-PK----------------------S-----VLVVGGGDGGVLREISRHSS-----VELIDICEIDKMVIDVCKEYFPE----LSV------G-FE--D---PRVRLHVGD------------------AVEFLRLA----------PAGKYDAIIVDSSD-P--V---G-----P-AQELVE--KPFFQTIARA-LR-PGGVLCNMA--ESMWLHTHLIQDMIS--ICCET-F---------------K-GSVRYAWASVPTYP---------S----GVIG--FLL----CST---------EG---P----------PVD--------FL--N-----P--------VN---------PI--------EKL-------------EGAVKYK--RE----LRFYNS-EVHSAAFALPTFL-KR---EVKLLRD----SPILAKGVDVS*------------------------------------------------------------------------------------------------------------------------------------------------
>Mesculenta|Manes.14G067700
-----------------------------------------------------------------------------------------------------------------------------------------------------------------MAAQNGFASAES---------------------------------EEINQTT--HLFSP---PYAIEMENHKSL----------------------NIPG-------------------------------------------------------------------------WYADV---------------------PYGWP------G---EAHLFKVEKVLFHGKSEYQDLFIFQ---SS-AHGKIVILNGAIQLTEKDEFVYQEMLTHLPLC--SIPN-PK----------------------K-----VLLIGGGDGGILKEISRHSS-----VDRIDICEIDKMVIDAYKRFFPD----IAI------G-YK--D---PRVNLHIGN------------------GVEFLKTV----------PQGTYDAILLDAFQ-C--M---G-----PEEEEVGD--KWFLESVARA-LR-PGGVMCCPA--DSLWHAEFSLSDYIA--RCRKA-F---------------K-GSVNYAWCTTPAYA---------S----GMIG--FML----CST---------EG---P----------PVD--------FK--H-----P--------VN---------IL----N---PEN-------------YGVAK-G---P----PLFYNS-EIHTAAFCLPSFAKKK---MFGSKI*----------------------------------------------------------------------------------------------------------------------------------------------------------------
>Mesculenta|Manes.15G028000
----------------------------------------------------------------------------------------------------------------------------------------------------------MGDIACSNGISNGNGVNGK--------------------------------------------------AHSSLNGYRKSC---------------------------------------------------------------------------------------------------WYEEE-----------------IEE-NLRFC--------------FALNSILHTGATQYQEIALLD---TK-PFGKALVIDGKLQSAEVDEFIYHECLVHPALV--YHPN-PK----------------------T-----IFIMGGGEGSTAREILRHST-----VDKVVMCDIDEEVVDFCKAYLAV----NKK------A-FC--D---PRLEIIIND------------------ARREIESR-----------KECYDVIIGDLAD-P--I-EGG-----P-CYKLYT--KSFYELCVKPKLN-EGGIFVTQAGPAGIFSHTEVFSCIYN--TLKQV-F---------------K-YVVPYS-AHVPSYA--------------DTWG--WVM----ASD----------S---P---------------------LV--L-----S--------AD---------EF----D---LRI-------------KQKIR-G---E----NRYLDG-KTFSSASILSKAV-RK---SLNNETH----VYT----EGAAR-----------FIY---GHGSACNQNHA*-------------------------------------------------------------------------------------------------------------------
>Mesculenta|Manes.16G084600
----------------------------------------------------------------------------------------------------------------------------------------------------------------MGEAVEIIYTNGF------------------------------------------SKLCS---QPTHPNLDQSSS---------------------------------------------------------------------------------------------------WYEET-----------------IDD-DLKWS--------------FALNSVLHKGTSEFQDIALLD---TK-RFGKVLVIDGKMQSAEVDEFIYHECLIHPSLL--CHPL-PR----------------------N-----VFIMGGGEGSAAREALKHNS-----IEKVVMCDIDQEVVNFCRTYLTV----NQD------A-FC--N---KKLNLVIND------------------AKAELEKR-----------TDKFDIIIGDLAD-P--V-EGG-----P-CYQLYT--KSFYEQILKPKLN-DNGIFVTQAGPAGIFTHKEVFSSIYN--TIKQV-F---------------K-YVVAYS-AHVPSFA--------------DTWG--WVM----ASD----------Q---P---------------------FS--I-----D--------AE---------EI----D---RRI-------------EERIE-G---E----LLYLNG-AAFISSATLNKTV-SL---SLLNETH----VYT----EDDAR-----------FIP---GHGLGYRN*----------------------------------------------------------------------------------------------------------------------
>MFZO_scaffold_2024462_Zygnemopsis_sp.
------------------------------------------------------------------------------------------------------------------------------------------------------------MADGEAAQKVTSFEEEG--------------------------------------------------HKPGTARANMDS----------------------VMKG-------------------------------------------------------------------------WFSEV---------------------SPMWP------G---EAHSLKMEKVLFEGKSDFQDVVVFE---SA-TYGRVLVLDGVIQLTQRDESAYQEMITHLALC--SIPN-PK----------------------K-----VLVVGGGDGGVLREVSRHAS-----VEQIDIAEIDKMVIDVAKEYFPE----LAV------G-YT--D---PRVNVYVGD------------------GVAFLKNT----------TPGTYDAIIVDSSD-P--I---G-----P-AQQLFE--RPFFESMARA-VR-PGGVVCTQA--ESLWLHLPIIKEITA--ACKHA-F---------------K-GTVQYAWTSVPTYP---------S----GTIG--FML----CST---------PG---P----------EVD--------FH--T-----P--------LM---------RL----E---EQA---------------PHPEGSGRPTLEPLKYYNS-QVHRAAFCLPQFA-KT---ELDPLLT----------PPKSS*------------------------------------------------------------------------------------------------------------------------------------------------
>MFZO_scaffold_2024819_Zygnemopsis_sp.
-------------------------------------------------------------------------------------------------------------------------------------------------------------------------------------------------------------------------------MSSGSRL--------------------------------------------------------------------------------------------------------WFEEE-----------------LEE-DLRWV--------------FGVKSVLHTGTSDFQDIELVD---SG-PFGKVLILDGKLQSAEADEFVYHESLIHPALL--YHPN-PK----------------------R-----VFIMGGGEGSTAREILRHTS-----VETVVMCDIDQEVVDFCRKHLTV----NQE------A-FG--S---NRLQLIIND------------------ARAELMKE-----------QEAYDVIVGDLAD-P--V-DGG-----P-CYRLYT--ESFYVNVLKPRLK-PGGILVTQAGPAGILSARHVYTPIYN--TLRHV-F---------------K-YVTPYA-AHVPSYA--------------DTWG--WIM----ASD----------E---P---------------------LP--A--------------IE-------AKEV----D---ARI-------------AERLQ-G---E----LRFLDG-ETVGAMVALNKHM-RR---MLQEETT----VYT----EDSPL-----------FIH---GHGTQALHSSEKTQG*---------------------------------------------------------------------------------------------------------------
>Mguttatus|Migut.A00087
-----------------------------------------------------------------------------------------------------------------------------------------------------MGEAVEFLAYNNGFSNVHFETNHN---------------------------------NMIIQQN--DLLVH---HHQQQQQQQEDS---------------------------------------------------------------------------------------------------WFEEE-----------------IDV-HLKWS--------------FALNRVLHKGTSEYQDIALLD---TK-HFGKVLVIDGKMQSAEVDEFIYHECLIHPPLL--CHPN-PK----------------------T-----MFIMGGGEGSAAREALRHKS-----IEKVVMCDIDQEVVDFCRKHLTA----NHE------A-FR--N---TKLDLVIND------------------AKAELEKR-----------KEKYDIIVGDLAD-P--V-EGG-----P-CYQLYT--KSFYENILKPKLN-TNGIFVTQAGPAGVFTHKEVFSSIYN--TIKHV-F---------------K-YVRAYT-AHVPSFA--------------DTWG--WVI----ASD----------Q---P---------------------LC--I-----E--------AG---------KM----D---KKI-------------AERID-G---E----LLYLNG-ATFVSSTILNKTV-AK---TLKNESH----VYA----EDNAR-----------FIH---GQG-VAYR-I*--------------------------------------------------------------------------------------------------------------------
>Mguttatus|Migut.E00155
--------------------------------------------------------------------------------------------------------------------------------------------------------------------MEANNSGTA--------------------------------------------------AAAAELPDSISS----------------------VIPG-------------------------------------------------------------------------WFSEI---------------------SPMWP------G---EAHSLKVEKILFQGKSDYQNVMVFQ---SA-TYGKVLVLDGVIQLTERDECAYQEMITHLPLC--SILN-PK----------------------K-----VLVIGGGDGGVLREVARHSS-----VEKIDMCEIDKMVVDVSKEHFPS----VAV------G-FN--D---PRVTLHIGD------------------GVAFLKAV----------EEGTYDAVIVDSSD-P--I---G-----P-AQELFE--KPFFESVAKA-LR-PGGVMCTQA--ESIWLHMHIIEDIVS--NCRQI-F---------------K-GSVNYAWTTVPTYP---------S----GVIG--FML----CST---------EG---P--------D--VD--------FK--R-----P--------VN---------PI----D---ADD------------SLAQAK-G---P----LRFYNS-EIHSAAFCLPSFA-RK---VIELKD*----------------------------------------------------------------------------------------------------------------------------------------------------------------
>Mguttatus|Migut.F00231
-------------------------------------------------------------------------------------------------------------------------------------------------------MEGSTGKGLDVRENGANCSDEA--------------------------------------VVIPSCCLKAKASDPEVDAICHST----------------------VVSG-------------------------------------------------------------------------WFSEH-------QSSSDANLTEVYFNNPMWP------G---EAHSLKVEKVLFKEKSKYQEVMVFQ---SS-AYGKVLVLDGIVQLTEKDECAYQEMITHLPLC--SIQS-PT----------------------N-----VLVVGGGDGGVLREICRHSS-----VKLIDICEIDQMVIDVSKKFFPE----LAM------G-FE--D---PRVHLHVGD------------------AIDFLRHA----------PQGKYDAVIVDSSD-P--V---G-----P-AQELVE--RPFFESIARA-LR-PGGVLCNMA--ESMWLHTHLIQDMVS--LCRQI-F---------------K-GSVRYAWASVPTYP---------S----GVIG--FVL----CST---------EG--FP----------SVD--------FL--H-----P--------IN---------PI----ENLEDAL-------------HYRRE----------LMFYNS-EIHKAAFALPSFV-KN---EVESLRD--------------C*------------------------------------------------------------------------------------------------------------------------------------------------
>Mguttatus|Migut.L01398
-----------------------------------------------------------------------------------------------------------------------------------------------------------------------------------------------------------------------MELNN---GAAAELPESMSS----------------------VLPG-------------------------------------------------------------------------WFSEI---------------------SPMWP------G---EAHSLKVEKILFQGKSDYQNVIVFQ---SS-TYGKVLVLDGVIQLTERDECAYQEMITHLPLC--SIPN-PK----------------------K-----VLVIGGGDGGVLREVSRHAS-----VEKIDICEIDKMVVDVSKEFFPK----VAV------G-YE--D---PRVTLHIGD------------------GVAFLKAV----------PEGTYDAVIVDSSD-P--I---G-----P-AQELFE--KPFFQSVAKA-LR-PGGVICTQA--ESIWLHMHIIEDIVS--NCRQI-F---------------K-GSVNYAWTTVPTYP---------S----GVIG--FML----CST---------EG---P----------AVD--------FK--N-----P--------IN---------RI----D---DDE-------------SHVKTNG---P----LKFYNS-EIHSAAFCLPSFA-RR-----------------------GD*------------------------------------------------------------------------------------------------------------------------------------------------
>MIRS_scaffold_2085178_Climacium_dendroides
------------------------------------------------------------------------------------------------------------------------------------------------------------------------------------------------------------------------------------------------------------------MPG-------------------------------------------------------------------------WFSEI---------------------SPMWP------G---EAHSLKVEKFLFEGKSDYQDVVVFE---SA-TYGRVLVLDGVIQLTQRDECAYQEMITHLPLC--SIPN-PK----------------------K-----VLVVGGGDGGVLREVSRHTS-----IEQIDICEIDKMVVDVAKEYFPD----VAI------G-FD--D---PRVNLHIGD------------------GVAFLREV----------PEGTYDAIVVDSSD-P--V---G-----P-AQALFE--RPFYKSLDRA-LR-PGGVICTQA--ESLWLHMPIIKDIVA--ACGHT-F---------------K-GSINYAWTSVPTYP---------S----GVIG--FML----CSS---------AG---P----------FVN--------FR--E-----P--------CN---------PI----D---KAV-------------DTKLSSR--RP----LKFYNS-AMHAAAFSLPQFA-KE---ELEHLLT----------PPPSS*------------------------------------------------------------------------------------------------------------------------------------------------
>MMKU_scaffold_2047424_Nephroselmis_olivace
-------------------------------------------------------------------------------------------------------------------------------------------------------------------------------------------------------------------------------MGGAEKRTYSRR--------------------------------------------------------------------------------------------------LWLEEE-----------------IED-DLKWC--------------FIVKEVLHSGVSKYQDVELVE---SG-PFGKVLLLDGKMQSAEADEFVYHECLCHPALL--HHPN-PK----------------------T-----VFVMGGGEGSTIREILRHKT-----VEKVVMCDIDEVVVDFCRKHLTM----NSN------A-FA--D---KRLELIIND------------------AKVELENS------------GTYDVIIGDLAD-P--V-YGG-----P-CYQLYT--QEFYEDILKKHLN-PGGIFITQSGPCGILSHQQVFTPIAK--TVETV-F---------------K-NIVPYG-VHVPSFS--------------DSWG--YSM----AFL---------DP-KTP---------------------IL--S--------------GE---------EL----E---KRT-------------KARIS-G---E----LSFLDG-ETWNSIKGLNKAV-RK---NLAEEKR----VYN----KDSNF-----------FIH---GEGVAE*------------------------------------------------------------------------------------------------------------------------
>MTGC_scaffold_2000312_Dennstaedtia
--------------------------------------------------------------------------------------------------------------------------MEAPCFSSPSPPAEPCPSSHAEPTATFCSSPASLCARGVDSPSKRLCSGAA--------------------VLASSASGTCSSSPELCISA--ARMEG---VKPGSGRANISS----------------------VIPG-------------------------------------------------------------------------WFSEI---------------------SPMWP------G---EAHSLEVKEILFEGKSDYQDVLVFQ---SA-TYGKVLVLDGVIQVTERDECAYQEMIAHLPLC--SIPN-PH----------------------K-----VLVIGGGDGGVLREVSRHKS-----VEQIDICEIDKMVIDVAKTFFPD----IAV------G-FT--D---PRVKLFVGD------------------GAVFLKEV----------SDGFYDAVIVDSSD-P--V---G-----P-AKQLFE--TPFFESLARV-LR-PGGVVCTQA--ESLWLHMPIIKDIFT--SCRKT-F---------------K-GSVNYAWTSVPTYP---------S----GVIG--FML----CST---------EG---P--------A--VN--------FR--Q-----P--------IN---------PI----E---TLD------------TSLEVD-KSATP----LKFYNS-EIHSSAFCLPQFA-RE---ALDNM*-----------------------------------------------------------------------------------------------------------------------------------------------------------------
>MTGC_scaffold_2001883_Dennstaedtia
-----------------------------------------------------------------------------------------------------------------MAETACLPPYTSTSMAPSSRNLPPFTNPSPLHGYVNGSISSYTFNNGGGGGGGGGGGVGS--------------------GTPPTPKPSPLHPTSNGVMN--SNGIM---NAPHREVIQGVPLPPPISVYMNGSSLAHANNANPLRGG----------------------ANMISNINNNESTVVNYGINCSIKEKISSNEQGNGSPYPQGEVPSPRRPSLWYEEE-----------------IDE-NLRWS--------------FGLTSILHTGVSKYQEIALLD---TQ-PFGKVLTLDRKMQSAERDEWVYHECLVHPALL--LHHS-PK----------------------S-----IYIMGGGEGSTAREALRHRS-----VRKVVMCDIDEEVVKFCSAHLTM----NRE------A-FQ--S---NRLELVIND------------------AKAELESR-----------EERFDIIVGDLAD-P--L-EWG-----P-CYQLYS--KGFYESIVKPKLN-HGGILVTQAGPAGILSHKEVFTSIYN--TLKHV-F---------------T-YVVAYS-AHVPSYA--------------DTWG--WVM----ASD----------Q---P---------------------FT--Q-----I---SAIDELD--------CKI----K---QRI-----------------K-G---E----LRYLDG-ATLHASTILNKTV-RQ---SLIDEKH----VYT----EDSAR-----------FVY---GHG-RSAS-AH*-------------------------------------------------------------------------------------------------------------------
>MTGC_scaffold_2004589_Dennstaedtia
------------------------------------------------------------------------------------------------------------MSPSMAETACVAPYPSNPLPPSRDLPPFSNGTFVNGNIANIASYTASTAGAGATSTKNLPSSNGG-------------VVVPPQYANGTSLASGHIVVASNGSPI-VKGPQASSINGSSNGVLNKSS----------------------IMSN-----------------------------------------------SNGQSIQCNGAHCVQAEVAPPRRPSLWYEEE-----------------IDE-NLRWC--------------FGLTSILHTGVSKFQEIALLD---TQ-PFGKVLTLDRKMQSAEMDEWVYHECLVHPALL--LHQS-PK----------------------T-----IFIAGGGEGSTAREALRHKT-----VRKVVMCDIDEEVVKFCSAHLTV----NKE------A-FQ--S---SRLELVIND------------------AKAELECR-----------EEKFDVIIGDLAD-P--L-EWG-----P-CYQLYS--KGFYQNVVKPKLH-PGGIFVTQAGPAGVLSHKEVFTSIYN--TLRNV-F---------------T-YVVAYS-AHVPSYA--------------DTWG--WVV----ACD----------Q---P---------------------LM--S-----Q--------MS-------SDEL----D---CRI-------------KQRIK-G---E----LRYLDG-ATLHASTILNKTV-RQ---SLENEKH----VYT----EESAR-----------FVY---GHGRNTSGVAH*-------------------------------------------------------------------------------------------------------------------
>MTGC_scaffold_2047461_Dennstaedtia
---------------------------------------------------------------------------------------------------------------------------------MAMAGCEVGLKDKGVQQSLASPAAEKFLGDGNAPPCENSPLPEH--------------------KAAIKTMPFHYCCPRGLDPH--APGAT---ATPGTGRANLTH----------------------GIPG-------------------------------------------------------------------------WYSEI---------------------NSMWH------G---EAHSLKVDKILFEGKSDYQDVLVFQ---SE-AYGKVLVLDGVTQLTERDECAYQEMITHLPLC--SIPN-PK----------------------R-----VLVIGGGDGGVLREIGRHSS-----VEQIDICEIDEMVVDVSKQLFPQ----LAV------G-YD--D---PRVKLFVGD------------------GAAFLRDA----------PEGFYDAVIVDSSD-P--I---G-----P-AQQLFE--KPFFDSVARA-LR-PGGVLCTQT--ESLWLHMHTIQDLMA--VCRQT-F---------------K-GSINYAWTSVPTYP---------S----GVIG--LML----CST---------EG---P--------A--VN--------FR--Q-----P--------VN---------PI----E---KQQ--------SIKCQSNGSE-AHIRP----LKFYNS-EMHTAAFCLPQFV-RM---LLDPIVR-----------SASS*------------------------------------------------------------------------------------------------------------------------------------------------
>Mtruncatula|Medtr1g015300
--------------------------------------------------------------------------------------------------------------------------------------------------------MGEAPEMFYVNGFAKVVPEVQ--------------------------------------------------PNHVNNVDDSST---------------------------------------------------------------------------------------------------WYEEI-----------------IDD-DLKWS--------------FKLNSVLHKAISEYQDIALLD---TK-RFGKALMLDGKMQSSEADEFIYHECLIHPSLL--CHSN-PK----------------------T-----VFIMGGGEGSAAREALKHKS-----MEKVVMCDIDKEVVDFCRKYLVA----NKE------A-FA--D---KKLDLVINC------------------AKAELEKR-----------KEKFDIIVGDLAD-P--L-EDG-----P-CYQLYT--KSFYEKVVKPKLT-ENGIFVTQAGPAGIFSHKEVFTSIHN--TIKQV-F---------------K-YVVAYG-THVPSFA--------------DSWG--WVM----ASD----------Q---P---------------------IL-----------------ID-------AVEM----D---KRI-------------EERIK-G---K----LLYLDG-AWFHSSTIMNKAV-SK---SLKNETH----VYT----EDNAR-----------FIP---GHGIACRP*----------------------------------------------------------------------------------------------------------------------
>Mtruncatula|Medtr1g028360
------------------------------------------------------------------------------------------------------------------------------------------------MECPSQKIMDNISEKRCSGLEVGIGSNMN---------------------------------YEDIEKKIPSCCLKAKVSVPKLEGKCHST----------------------VVSG-------------------------------------------------------------------------WFSQS----------QSSSGEVVYFNNPMWP------G---EAHSIKVEKKLYEEKSNFQEVLVFE---SL-TYGKVLVLDGIVQLTEKDECAYQEMITHLPLC--SIQS-PK----------------------T-----VLVVGGGDGGVLREVCRHSS-----VTHVDICEIDKMVIDVSKKYFPE----LAV------G-FE--D---PRVHLHVGD------------------AVEFLRFT----------PEGKYDAIIVDSSD-P--V---G-----P-AQELVE--KPFFVTLAKA-LR-PGGVLCNMA--ESMWLHTHLIQDMIS--ICQQT-F-----------------ASVRYAWTTVPTYP---------S----GVIG--FIL----CSK---------EG-P-P-----------VD--------FV--N-----P--------IN---------PI----E-------------------IFEGTAKYTRE----LRFYNS-EMHKAAFALPAFL-KR---EVKLLRDTASIAHTN---SNGC*------------------------------------------------------------------------------------------------------------------------------------------------
>Mtruncatula|Medtr3g078190
--------------------------------------------------------------------------------------------------------------------------------------------------------------MGSIVHPSGVTSNDE---------------------------------TGFSTPK--ITAAE---GNVGESRSDEHP----------------------QIPG-------------------------------------------------------------------------WFAEH---------------------CPIWP------G---EAHFLKVENICFQGKSEFQDMLVFE---TS-TYGKVFVLDGALQLTEKDECSYQEMMTHLPLC--SIPN-PK----------------------K-----VLLFGGGDGGILREISRHSS-----VEQIDICEIDTMLIDVYKKYFPD----IAI------G-YK--D---PRVKLHVID------------------GTIFLNSV----------PKGTYDAIIVDAFD-P--V---------T--------------------LC-LGRVLCIQG--ESFWFKSLDIEELLI--KSRKI-F---------------K-GSSDYAWTNVPTYP---------RQVNIGVIG--FLL----CST---------EG---P--------------YVD----FR--N-----P--------IN---------PI----G---PEN-------------YGISK-H---P----LKYYNS-EVHSASFCLPSFA-KR---TEANKST-----------AKKI*------------------------------------------------------------------------------------------------------------------------------------------------
>Mtruncatula|Medtr3g091090
----------------------------------------------------------------------------------------------------------------------------------------------------MGDAVERGLECQKTMDGKASNGNGL---------------------------------EKEIPSC-CLKAMA---SAPELEANCHST----------------------VVSG-------------------------------------------------------------------------WFSAS-------QTCSEKSEEVLYFNNPMWP------G---EAHSIKVEKKLFQEKSLYQEVLVFE---SL-TYGKVLVLDGIVQLTEKDECAYQEMIAHLPLC--SIPS-PK----------------------N-----VLVVGGGDGGVLREVSRHSS-----VEHIDICEIDKMVIDVSRKFFPE----LAV------G-FD--D---PRVHLHVGD------------------AIEFLKRA----------PEGRYDAVIVDSSD-P--V---G-----P-AQELVE--KPFFETISKA-LR-PGGVLCNMA--ESMWLHTHLIQDMLS--ICRET-F---------------K-GSVHYAWASVPTYP---------S----GVIG--FLL----CST---------EG---P----------HVD--------FV--N-----P--------IN---------PI----E---KLE------------GADKHRRN--------LRFYNS-EIHTAAFALPAFL-KN---EVRLLRQ*---------------------------------------------------------------------------------------------------------------------------------------------------------------
>Mtruncatula|Medtr3g104960
---------------------------------------------------------------------------------------------------------------------------------------------------------MGEAPKLLYINGFPKYGHDE--------------------------------------------------TDHHLITNNYDH----------------------DIP--------------------------------------------------------------------------WYEEV-----------------IDD-DLKWS--------------FALNSVLHKGISDYQEIALLD---TK-RFGKALVIDGKMPSAEMDEFIYHECLIHPPLL--CHPN-PK----------------------R-----VFIMGGGEGSATRESLKHNQ-----VIE---------VVDFCKKYLIT----NRE------A-FA--H---KKLDLVIND------------------DKAELEKR-----------KEKFDIIVGDLAD-P--V-EGG-----P-CYQLYT--KSFYENILKPKLN-ENDIFVTQAGPAGILTHREVFTSIYN--TIKQV-F---------------K-YVIVYT-THVPSFA--------------DTWG--WVM----ASD----------Q---P--------------------LFI--G--------------SE---------EM----D---KRI-------------KERIN-G---E----LLYLTG-DWFHSSTTMNKTL-SQ---SLQNETH----VYT----EENAR-----------FIP---GHGVAYRL*----------------------------------------------------------------------------------------------------------------------
>Mtruncatula|Medtr5g006140
-------------------------------------------------------------------------------------------------------------------------------------------------------------MGEVAYTNGNGNDKSH--------------------------------------------------SPPNGYRKSC-----------------------------------------------------------------------------------------------------WYEEE-----------------IEE-NLRWC--------------FALNSILHTGASQYQDIALLD---TK-PFGKALVLDGKLQSAETDEFIYHECLVHPALL--HHPM-PK----------------------N-----VFIMGGGEGSTARELLRHKT-----IDKVVMCDIDEEVVEFCKSYLVV----NKE------A-FH--D---SRLEVVIND------------------AKAELEGK-----------EEKYDVIVGDLAD-P--I-EGG-----P-CYKLYT--KDFYELTLKPKLK-KGGIFVTQAGPAGIFSHTEVFSCIYN--TLRQV-F---------------K-YVVPYS-AHIPSYA--------------DIWG--WVL----ASD----------S---P---------------------LD--L-----S--------AE---------EL----D---IRM-------------RQRIIEE--------NRYLDG-KTFVSSSTLSKAV-RN---SLNNETH----VYT----EGAAR-----------FIY---GHGKNA*------------------------------------------------------------------------------------------------------------------------
>Mtruncatula|Medtr5g034470
---------------------------------------------------------------------------------------------------------------------------------------------------MAAAPENTTLLESTDFPLKRQREEED---------------------------------EDQLPHN--GFSET---VPKDPQPNGLSS----------------------VIPG-------------------------------------------------------------------------WFSEI---------------------SPMWP------G---EAHSLKVEKILFQGKSDYQNVMVFQ---SA-TYGKVLVLDGVIQLTERDECAYQEMITHLPLC--SIPN-PK----------------------K-----VLVIGGGDGGVLREVSRHAS-----VEKIDICEIDKMVVDVSKQFFPD----IAV------G-FE--D---PRVTLHIGD------------------GVAFLKAA----------PEGTYDAVIVDSSD-P--I---G-----P-AQELFE--KPFFESVARA-LR-PGGVVCTQA--ESIWLHMHIIEDIVV--NCRQV-F---------------K-GSVNYAWTTVPTYP---------S----GMIG--FML----CST---------EG---P--------S--VD--------FK--H-----P--------VN---------PI----D---END-------------SQHAG-R---P----LKFYNS-EIHSAAFCLPSFA-KR---AIASKSN*---------------------------------------------------------------------------------------------------------------------------------------------------------------
>Mtruncatula|Medtr8g063940
----------------------------------------------------------------------------------------------------------------------------------------------------MAAAESTVELESSMKRQRDDEEENN---------------------------------GVSVSTM--DVEGG---DDKDPNGNGVSS----------------------VIPG-------------------------------------------------------------------------WFSEI---------------------SPMWP------G---EAHSLKIEKILFQGNSDYQKVMVFQ---SS-TYGKVLVLDGVIQLTERDECAYQEMITHLPLC--SISN-PK----------------------K-----VLVIGGGDGGVLREVARHSS-----IEKIDICEIDNMVVEVSKQFFPE----VAV------G-FN--D---PRVTLRIGD------------------GVAFLKAA----------PEGTYDAVIVDSSD-P--I---G-----P-AQELFE--KPFFQSVARA-LR-PGGVMCTQA--ESIWLHMDIIENIVS--NCREI-F---------------K-GSVNYAWTTVPTYP---------S----GMIG--FML----CST---------EG---A----------LVD--------FK--H-----P--------VN---------PM----D---ENE-------------CQKSV-R---P----LKFYNS-EIHTAAFCLPSFA-KR---KIGSKEN*---------------------------------------------------------------------------------------------------------------------------------------------------------------
>NDUV_scaffold_2011956_Vittaria_appalachiana
--------------------------------------------------------------------------------------------------------------------------------------------------------------------------MEG--------------------------------------------------VMRRTGRANISS----------------------VIPG-------------------------------------------------------------------------WFSEI---------------------SPMWP------G---EAHSLEVKEILFEGKSAFQDVLVFQ---SS-TYGKVLVLDGVIQLTERDECAYQEMITHLPLC--SIPS-PQ----------------------K-----VLVIGGGDGGVLREVARHKS-----VKQIDICEIDQMVIDVAKKFFPD----IAV------G-FA--D---PRVRLYVGD------------------GADFLKEV----------PDGFYDAVIVDSSD-P--L---G-----P-AQQLFE--TPFFESLARV-LR-RGGVVCTQA--ESVWLHMHIICNIFT--FCKKT-F---------------K-GAVNYAWTSVPTYP---------S----GVIG--FML----CST---------EG---P----------VVN--------FR--H-----P--------IN---------PI----E---NSD-------------LNKVI-----P----LKFYNS-EIHTAAFCLPQFA-RE---ALGV*------------------------------------------------------------------------------------------------------------------------------------------------------------------
>NDUV_scaffold_2013815_Vittaria_appalachiana
---------------------------------------------------------------------------------------------------------------------------------------MARPAEEGHQLSSASPAPNFSDGDQSDPEVHGREDGRS----------------------VAKTMPFHFCCPRGLDPR--APGPI---YKPSTGRANLTN----------------------GIPG-------------------------------------------------------------------------WYSEI---------------------NPMWE------G---EAHCLKVEKILFEGKSDYQDVFVFQ---SK-AYGNVLVLDGVTQLTERDECAYQEMITHLPLC--SILN-PK----------------------R-----VLVIGGGDGGVLREISRHDS-----VEHIDICEIDEMVVNVSKKYFPQ----LAI------G-YE--D---PRVNLIIGD------------------GFTFLRNA----------TQGFYDTVIADSSD-P--F---G-----P-AQQLFE--KPFFDLVARA-LR-PGGVFCTQT--ESLWLHVHILQDLLA--VMKQT-F---------------K-GAINYAWTSVPTYP---------S----GTIG--LIL----CST---------EG---P----------AVN--------FR--K-----P--------VN---------PI----E---RQK-------------SARKA-GQCRP----LKFYNS-EMHTAALCLPQFV-RM---LLEPAIS-----------SGS*-------------------------------------------------------------------------------------------------------------------------------------------------
>NGTD_scaffold_2011153_Dicranum_scoparium_78
-----------------------------------------------------------------------------------------------------------------------------------------------------------MVEYNFEEGANGVHVNGT--------------------------------------------------SKPSPAQADPPK------------------------------------------------------------------------------------------------RCLWFEEE-----------------LEE-DLRWV--------------FGVSKILHTGVSEFQDIQLVE---SG-PFGKVLILDGKLQSAEADEYVYHEAIIHPALL--YHPN-PK----------------------N-----VFIMGGGEGSTAREALRHRT-----VEEVVMCDIDEEVVNFCRKHLTV----NAE------A-FR--S---NRLDLVINC------------------ARAELEKR-----------TEQFDIIIGDLAD-P--V-AGG-----P-CYQLYT--KSFYERILKPRLK-DGGILVTQGGPAGILSHKEVYSSIYN--TLRQT-F---------------K-YVVPYA-AHVPSYA--------------DTWG--WVM----ASD----------Q-PIP---------------------AM--S--------------VE---------ET----D---SRI-------------KHRVD-G---E----LQFLDG-QTLSATMALNKHV-RK---SLAAERH----VYT----EETAR-----------FIH---GHGTALKN*----------------------------------------------------------------------------------------------------------------------
>NGTD_scaffold_2100394_Dicranum_scoparium
--------------------------------------------------------------------------------------------------------------------------------------------------MGRTDDEQAPAQGSRNAAELIAQDNAA--------------------------------------------------PAPSTARANLSS----------------------IMPG-------------------------------------------------------------------------WFSEI---------------------SPMWP------G---EAHSLKVEKFLFEGKSDYQDVVVFE---SA-TYGRVLVLDGVIQLTQRDECAYQEMITHLPLC--SIPN-PK----------------------K-----VLVVGGGDGGVLREVSRHKS-----IEQIDICEIDKLVVDVAKEFFPE----VAV------G-FD--D---PRVNLNIGD------------------GVAFLKEV----------PEGTYDAIIVDSSD-P--V---G-----P-AQALFE--RPFYKSLDRA-LR-PGGVICTQA--ESLWLHMPIIKDIVA--ACRHT-F---------------K-GSINYAWTSVPTYP---------S----GVIG--FML----CST---------AG---P----------SVN--------FR--E-----P--------CN---------PI----E---KAV-------------DDKPSSR--RP----LKFYNS-AMHAAAFSLPQFA-RE---ELEHLLT----------PPPSS*------------------------------------------------------------------------------------------------------------------------------------------------
>NOKI_scaffold_2012078_Lindsaea_linearis
--------------------------------------------------------------------------------------------------------------------------------------------MEILPSTTTGGGEALVEQEATEGVERLNEELPC--------------------SKKPRPHPTSPLEFYLLPPP--ASLAD---AKPGSGRANIST----------------------VIPG-------------------------------------------------------------------------WFSEI---------------------SPMWP------G---EAHSLKVEEVLFEGKSDFQDVLVFQ---SA-SYGKVLVLDGVIQLTERDECAYQEMITHLPLC--SIPN-PK----------------------K-----VLVIGGGDGGVLREVSRHKS-----VEQIDICEIDKMVVNVAKEFFPG----IAI------G-FA--D---PRVKLFIGD------------------GSVFLKDV----------TDAFYDAVIVDSSD-P--I---G-----P-AQQLFE--KPFFESLARV-LR-PGGVVCTQA--ESLWLHLHIIKDIFS--VCRQT-F---------------R-GSVNYAWTSMPTYP---------S----GVIG--FML----CSK---------EG---P--------------KVN----FR--V-----P--------VN---------PI----E---KVD------EGVSKQNDSRHT-KNIQP----LKFYNS-EMHTSAFCLPEFV-QS---ALESVCQ*---------------------------------------------------------------------------------------------------------------------------------------------------------------
>NOKI_scaffold_2014218_Lindsaea_linearis
-----------------------------------------------------------------------------------------------------MAPSMAETACLYPSKATMAAPSPPFSNGSALHHGYVGGINNIASYNTAPSVNGAAGAAASKPTNNGYTNGSSSPAAHVIPPHPASVQYSNGSSAANGHGAAHPNGKGNHAPPLHATSNGIGAKLNTTSGNGQPV-----------HTNTGSISSIVEVPA-------------------------------------------------------------------PRRPSLWYEEE-----------------IDE-SLRWS--------------FGLSSILHTGVSKFQEIALLD---TL-PFGKVLTLDRKMQSAEMDEWVYHECLVHPALL--LHKS-PK----------------------S-----VFIMGGGEGSTAREALRHWS-----IERVVMCDIDEEVVKFCSEHLTV----NKE------A-FQ--S---KRLELCIND------------------AKLELESR-----------QEKFDIIIGDLAD-P--L-EWG-----P-CYQLYS--RDFYRNVVQPKLS-KGGIFVTQAGPAGVLSHKDVFSSIYN--TLRNV-F---------------A-YVVAYS-AHVPSYA--------------DTWG--WVV----ASD----------Q---P---------------------LM--R-----Q------VSIE---------EL----D---CRI-------------KQRIE-G---E----LRYLDG-ATMHASTVLNKTV-RH---SLENERH----VYT----EESAR-----------FIY---GHGRAH*------------------------------------------------------------------------------------------------------------------------
>NOKI_scaffold_2014903_Lindsaea_linearis
-----------------------------------------------------------------------------------------------------------------------------------------------MNGHPNSVIKGNTSNGSANSQTHINATKGS---------------------------------ANSNGQASQSNGNLSSQPSEVITPTRPSL---------------------------------------------------------------------------------------------------WYEEE-----------------IDE-SLRYC--------------FGLKSILHTGLSKFQEIALLD---TH-PFGKVLTLDRKMQSAEKDEWVYHECLVHTPLL--LHQC-PK----------------------S-----IFICGGGEGSTAREALKHFS-----LRKVVMCDIDEEVVKFCRSHLTI----NQS------A-FL--S---PRLELVIND------------------AKAELESR-----------EEKFDVIVGDLAD-P--L-ECG-----P-CYQLYC--KGFYQSVVKPKLN-SGGIFVTQAGPAGILSHKEVFTSIYN--TLRQV-F---------------T-FVVAYS-AHVPSYA--------------DTWG--WVM----ASD----------Q---P---------------------FS--Q--------------IS---------DV----DELDCKI-------------KQRIK-G---E----LRYLDG-ATLHATTILNKAV-RQ---SLAEEQH----VYT----EDSAR-----------FLY---GQGRSTTSH*---------------------------------------------------------------------------------------------------------------------
>NOKI_scaffold_2016928_Lindsaea_linearis
--------------------------------------------------------------------------------------------------------------------------------------------------MAGCEALKGPPADQGCADQQQHHRNTT--------------------PRTVDRMPFHFCCARGLDPS--APGAI---ATPGTGRQNLDR----------------------GVPG-------------------------------------------------------------------------WYSEI---------------------NDMWH------G---EAHSLKIEEILFEGKSDYQDVLVFQ---ST-AYGKVLVLDGVIQLTERDECAYQEMITHLPLC--SIPN-PR----------------------K-----VLVIGGGDGGVLREICRHSS-----VDHIDICEIDKMVIDVSKKFFPQ----LAI------G-YD--D---PRVKLFVGD------------------GFAFLKDA----------KEGFYDAIIVDSSD-P--I---G-----P-AQQLFE--KPFFDLVERT-LR-PGGVLCTQT--ESLWLHMHTIQDLAS--VCRQT-F---------------K-GSINYAWTSVPTYP---------S----GVIG--LML----CST---------KG---P----------AVN--------FR--Q-----P--------VN---------LI----E---KQK------------NESSTSNGSARP----LKFYNS-EMHRAAFCLPQFV-HM---LLDPILS------------SNA*------------------------------------------------------------------------------------------------------------------------------------------------
>NOKI_scaffold_2095274_Lindsaea_linearis
---------------------------------------------------------------------------------------------------------------------------------------MEAEPTTTLDLPCVEAAASCISSSLVDSPSARTCASGT-----------------VLASSGNGTCTGSLPDFCCSGILSSSSSASMEGIKPGSGRANIST----------------------VIPG-------------------------------------------------------------------------WFSEI---------------------SPMWP------G---EAHSLEVEEILFEGKSDFQDVLVFQ---SA-SYGKVLVLDGVIQLTERDECAYQEMIAHLPLC--SIPN-PR----------------------K-----VLVIGGGDGGVLREVSRHKS-----VEQIDICEIDKMVVDVAKRFFPD----VAV------G-YQ--D---PRVKLFVGD------------------GVVFLKDV----------PDGFYDAVIVDSSD-P--V---G-----P-AQQLFE--KPFFQSLARV-LR-PGGVVCTQA--ESLWLHMHIIQDIFQ--ACRQT-F---------------K-GSVNYAWTSVPTYP---------S----GVIG--FML----CST---------EG---P----------KVN--------FR--E-----P--------IN---------PI----E---KAE-------------GPPQNGQKPRP----LKFYNS-EMHTGAFCLPQFA-KQ---ALTTGM*----------------------------------------------------------------------------------------------------------------------------------------------------------------
>NRWZ_scaffold_2099385_Metzgeria_crassipilis
------------------------------------------------------------------------------------------------------------------------------------------------------------------------------------------------------------------------MASI---GKEVPLSSNEES----------------------LMQG-------------------------------------------------------------------------WFSEI---------------------GAMWP------G---EAHSLKFTAKLFDQKSKFQHVQVYQ---TE-TYGKCLVLDGVIQLTERDECSYQEMITHLPLC--SVPN-PK----------------------K-----VLVIGGGDGGVLREVSRHTS-----VESVEICEIDEMVVDVSKQFFEN----VAV------G-YK--D---PRVTVHIGD------------------GVKYLRDA----------KSGTYDCIIVDSSD-P--I---G-----P-AEGLFQ--KPFYESLARA-LK-PGGVACTQA--ESIWLHLPIIKEVLE--VNKNI-F---------------K-GSLNYAWISVPTYP---------S----GTIG--FML----CST---------EG---H--------------AVD----FS--T-----P--------SN---------PI----E---KFC-----------KSEESLK-LIRKP----LQYYNS-AVHRAALVLPEFA-RE---SLGDLLT------------SPP*------------------------------------------------------------------------------------------------------------------------------------------------
>NRWZ_scaffold_2099900_Metzgeria_crassipilis
---------------------------------------------------------------------------------------------------------------------------------------------MTEAITTTIHLNGSSGTPKVSVGSKRYHMGEP-------------------------VPTTPHMSNGAGAMHTNGLAAVGTKASPLNGGSKRCL---------------------------------------------------------------------------------------------------WFEEE-----------------IEK-DLRWV--------------FGVSRILHTGVSQFQDIELVE---SG-PFGKVLLLDGKLQSAELDEFVYHESIVHPACL--YHTN-PR----------------------T-----VFIMGGGEGSTAREALKHMS-----VKKVIMCDIDEEVVNFCRQHLGE----NSE------A-FK--S---YRLELVISC------------------ARAELERR-----------EEQFDIIVGDLAD-P--V-AGG-----P-CYRLYT--QSFYERVLKPKLA-PGGIFVTQAGPAGILSHREVYSSIFN--TLRQV-F---------------K-YVVPYA-AHVPSYA--------------DTWG--WVM----ASD----------H---P---------------------FP--A----FS--------AE---------ET----D---SKI-------------AHRLV-G---E----LRFLDG-ETLAATLSLNKTV-RN---SLQRETH----VYT----EETAR-----------FVH---GHGTAVQKH*---------------------------------------------------------------------------------------------------------------------
>NRXL_scaffold_2002622_Metasequoia_glyptostroboides
-------------------------------------------------------------------------------------------------------------------------------------------------MADNNTNNGASSVALDLPIKRPRSEEEI---------------------------------DNHSAAP--SSQVT---AMEDGAAESYPS----------------------VISG-------------------------------------------------------------------------WFAEM---------------------SPMWP------G---EAHSLKVENILFQGRSDFQDVMVFE---SA-TYGKVLVLDGVIQLTERDECAYQEMITHLPLC--SIPN-PK----------------------K-----VLVIGGGDGGVLREVSRHNS-----VEQIDICEIDGMVVNVSKEYFPN----IAV------G-FQ--D---PRVKLCIGD------------------GVAFLRDC----------PEGTYDAVIVDSSD-P--I---G-----P-AEELFK--KPFFESVARA-LR-PGGVVCTQA--ESMWLHMPIIEDIVN--VCRQT-F---------------K-GSVNYAWTTVPTYP---------S----GMIG--FML----CST---------EG---P----------SVD--------FR--H-----P--------IN---------AI----D---KQE-------------CNLKSLG---P----LRFYNS-EMHTAAFCLPAFA-RR---AIGSKVQ-----------PSST*------------------------------------------------------------------------------------------------------------------------------------------------
>NRXL_scaffold_2062002_Metasequoia_glyptostroboides
----------------------------------------------------------------------------------------------------------------------------------------MGEAAATNGFSIKGNGNGNGNGHCNGYSNGHAHCNGY---------------------------------SNGGSAS-VSSNGVNHLPYSNGSTVHHSN------------------GHSHMSPS----------------------------------------------------------------FGDGRRRCFWYEEE-----------------IED-DLRWC--------------FALNRILHTGVSDYQDIALID---TR-PFGKALVIDGKMQSTEVDEFIYHESLVHPALV--YHSH-PK----------------------S-----AFIMGGGEGSTAREILRHKS-----VKKVVMCDIDKEVVDFCKKYLVV----NRE------A-FN--N---SRLELVIND------------------ARAELQNR-----------QERFDVIIGDLAD-P--V-EGG-----P-CYQLYT--KSFYEIVIKPKLN-HQGIFVTQAGPAGVLTHTQVFSSIYN--TLRQV-F---------------K-HVMPYS-AHVPSFA--------------DTWG--WVM----ASD----------H---P---------------------LS--L-----E--------AE---------EI----D---NRI-------------KQRVK-G---E----LQFLDG-QSFVVAATLNKSV-RK---SLSKETH----VYT----EETAR-----------FIH---GHGKASHQ*----------------------------------------------------------------------------------------------------------------------
>NTLE_scaffold_2009491_Asteromonas_gracilis
--------------------------------------------------------------------------------------------------------------------------------------------------------------------------------------------------------------MSAGPVT----------THHGELGKAEQG----------------------MRDG-------------------------------------------------------------------------WFTEL---------------------SPMWP------G---MGMSLKVEEILYAGKSKFQDVCVFR---SQ-TFGNVLLLDGVIQATERDEFSYQEMITHIPLC--ALKEQAK----------------------R-----VLVVGGGDGGVLRELIRHRR-----VEEIHLAEIDDMVPEVSKKYFSK----MAC------G-FK--D---SRAQVHICD------------------GIDFVRKA----------PEGSYDAIIVDSSD-P--V---G-----P-AEVLFE--KPFFEALHRA-VR-PGGIVCTQA--ESLWLHLDIIKALAS--MCASV-F---------------EGGSVSYAHTTIPTYP---------S----GQIG--MML----CVK---------GG--VP---------------------SE--L--------------LD---------PR----E---ARQ---------------PPPNDAPDPEIGKLRYYSS-EVHKSAFSLPQFA-KD---ALQGNLS---------------------------YQ*----------------------------------------------------------------------------------------------------------------------------------
>NTLE_scaffold_2052517_Asteromonas_gracilis
---------------------------------------------------------------------------------------------------------------------------------------------------------------------------------------------------------------------------------MSEGAKRL-----------------------------------------------------------------------------------------------------WLEED-----------------LET-NLKWS--------------YRVHSVLYSGSSEYQEVDLVD---TP-TFGKVLLLDGKMQSTDLDETFYHELLVHPALL--QHPN-PK----------------------R-----VFIMGGGEGSTAREVLRHKS-----VEEVVMVDIDKVVTDFCSQYLPR----NAE------A-FK--D---PRLKLTNDD------------------AAVQLEKA-----------QGTFDVIIGDLAD-P--L-DGG-----P-CYQLYT--SEFYKTIVKPKLS-PSGIFITQAGPAGFTSCKEVFSSIHQ--TMKGV-F---------------P-TVIPYA-QHFPSFC--------------DCWG--YNL----AFN----------D---P------QAK------------LL--D-----P---------S---------SL----D---SAI-------------ASRIE-G---P----LEYVDG-ETLTGLTKLNKHV-RE---VLKNETR----TYT----KESAS-----------FIF---GSG-LGKA-SEKS*-----------------------------------------------------------------------------------------------------------------
>NWQC_scaffold_2153317_Plagiochila_asplenioides
------------------------------------------------------------------------------------------------------------------------------------------------MAMERTDDEQAAAQGSRNAAELIAQDNAA--------------------------------------------------PVPSTARANLSS----------------------IMPG-------------------------------------------------------------------------WFSEI---------------------SSMWP------G---EAHSFKVEKFLFEGKSDYQDVVVFE---SA-TYGRVLVLDGVIQLTQRDECAYQEMITHLPLC--SISN-PK----------------------K-----VLVVGGGDGGVLREVSRHKS-----IEQIDICEIDKLVVDVAKEFFPD----VAV------G-FD--D---PRVNLHIGD------------------GVAFLKEV----------PEGTYDAIIVDSSD-P--V---G-----P-AQALFE--RPFYKSLDRA-LR-PGGVICTQA--ESLWLHMPIIKDIVE--ACRHT-F---------------K-GSINYAWTCVPTYP---------S----GVIG--FML----CST---------AG---P----------SVN--------FR--E-----P--------CN---------PI----E---KAV-------------DDKPSSR--RP----LKFYNS-AMHAAAFSLPQFV-KE---EVEHLLT----------PNPSS*------------------------------------------------------------------------------------------------------------------------------------------------
>NWQC_scaffold_2155800_Plagiochila_asplenioides
-------------------------------------------------------------------------------------------------------------------------------------------------------MMSILDSNLDRFASSMTVKATS---------------------------------HKLQQPV--TDLYS---NFASKSLHGVI-----------------------LLRGEVA----------------------------------------------------------------------DFTTD---------------------HPAFL------YDEGEARSLKIEKQLFEGQSDFQHVQVFQ---SE-SYGKVLVLDGVIQLTERDEFSYQEMITHLPLC--SVPN-PK----------------------K-----VLVIGGGDGGVLREVSRHVT-----VEQVDICEIDKMVVDVSKEFFPN----VAI------G-FQ--D---PRVNVHIGD------------------GVKFLQDA----------EAKTYDVIIVDSSD-P--I---G-----P-AEGLFQ--RPFYESLARA-LR-PGGVACTQA--ESIWLHLPIIKEVVA--INCSI-F---------------K-GSINYAWTSVPTYP---------S----GVIG--FML----CST---------EG---P--------R--VD--------FS--K-----P--------IN---------PI----E---SFA-----------STEESLK-LVKEP----LKYYNS-QVHNAALTLPQFA-RE---SFGDLLT-----------SYNT*------------------------------------------------------------------------------------------------------------------------------------------------
>NWQC_scaffold_2159517_Plagiochila_asplenioides
----------------------------------------------------------------------------------------------------------------------------------------MTEAITTTTTIHLNGSAAPTKGSIVAVGSKRYHMGDS-------------------------------IPGLHANGA-ASNGSAMHVNGSNGSVGKKNG----------------------VIKN------------------------------------------------------------------VESKRCLWFEEE-----------------LYE-DLRWV--------------FGVSKILHTGVSEFQDIQLVE---SG-PFGKVLLLDGKLQSAEADEFVYHESLVHPASL--YHAN-PK----------------------S-----VFIMGGGEGSTAREVLRHKS-----VKKVVMCDIDKEVVDFCREHLSS----NAE------A-FR--C---RRLELVINC------------------ARAELERR-----------EEQFDIIVGDLAD-P--V-EGG-----P-CFKLYT--KSFYERVLKPKLA-PGGIFATQAGPAGILSHKEVYSSIYN--TLRQV-F---------------E-YVVPYA-AHVPSYA--------------DTWG--WIM----ASD----------H---P---------------------FP--T----FS--------VE---------ET----E---SRI-------------ALRVQ-G---E----LRFLDG-PTMAATFALNKSV-RT---SLKKETH----VYT----EETAR-----------FIH---GHGNVQKH*----------------------------------------------------------------------------------------------------------------------
>NWWI_scaffold_2013240_Nephrolepis_exaltata
---------------------------------------------------------------------------------------------------------------------MAASYSTPPSSSSPRAKSSLLTHTETSAYWGSSSSSSFPAPGVHSPSQRLCCSSAL--------------------ASSGTTGTSSPEPCSLSSSA--ARMEG---VKPGSGRANISS----------------------VIPG-------------------------------------------------------------------------WFSEV---------------------SPMWP------G---EAHSLEVKEILFEGKSDFQDVLVFQ---SA-TYGKVLVLDGVIQVTERDECAYQEMISHLPLC--SIPN-PQ----------------------K-----VLVIGGGDGGVLRELARHKS-----VEQIDICEIDKMVIDVAKKFFPH----IAI------G-FE--D---PRVNLFVGD------------------GAVFLKGV----------SDGFYDAVIVDSSD-P--V---G-----P-AQQLFE--TPFFESLARV-LR-PGGVVCTQA--ESLWLHMHIIKDIFS--ACRKT-F---------------K-GSVNYAWTSVPTYP---------S----GTIG--FML----CST---------EG---P--------A--VN--------FR--Q-----P--------IN---------PI----E---KIE------------GADTST-R---P----LRFYNS-EMHSSAFCLPQFA-RQ---ALDQTS*----------------------------------------------------------------------------------------------------------------------------------------------------------------
>NWWI_scaffold_2019754_Nephrolepis_exaltata
-----------------------------------------------------------------------------------------------------------------MSPSMAETTCVAPYPSNRDLPPFSNGSFANGNASIASYTGASNGGAGAASTKNSPSSNGV--------------------ASIANNMQASAHYSNGSSLANGLHGVAASNGSPHVKGPHASAMNGSSNAVSNNTGTPYKAGAISCTLG------------------------------------------------ASAAVQTNGVLCAQPEVATPRRPSLWYEEE-----------------IDE-NLRWC--------------FGLTSILHTGVSKYQEIALLD---TL-PFGKVLTLDRKMQSAEMDEWVYHECLVHPALL--LHQS-PK----------------------S-----IFVAGGGEGSTAREALRHRS-----VRKVVMCDIDEEVVKFCSAHLTA----NKE------A-FQ--S---NRLELVINC------------------AKAELECR-----------DDKFDVL--NHRG----L---G---------------RPFG----------VGALLST------------LLQRLLP--KCCEA-----------------Q--------------A--------------QCW---WDL----CDP--------------S---------------------WA-----------------CR-------------------SVI-----------------------P-------------------------QG---GLHIYI*----------------------------------------------------------------------------------------------------------------------------------------------------------------
>NWWI_scaffold_2031800_Nephrolepis_exaltata
---------------------------------------------------------------------------------------------------------------------------MAACEVGIKQPGDIECFASAAAEKCMEDDGAPSLCDGSPPPMPSPSFHKD--------------------QGTFHRMPFHFCCPRGMDPH--APRAT---ATPGTGRANLSR----------------------GIPG-------------------------------------------------------------------------WYSEI---------------------NSMWQ------G---EAHSLKVEKILFEGKSDYQDVLVFQ---SE-AYGKVLVLDGVIQLTERDECAYQEMITHLPLC--SIPN-PK----------------------K-----VLVIGGGDGGVLREISRHTS-----VDQIDICEIDQMVVDVSKRFFPE----LAV------G-YN--D---PRVKLFVGD------------------GAAFLKDV----------PEGIYDAVIVDSSD-P--I---G-----P-AQQLFE--KPFFDLVVRA-LR-PGGVLCTQT--ESLWLHMHTIQELVA--VCRQT-F---------------K-GSINYAWTSVPTYP---------S----GVIG--LML----CST---------EG---P--------A--VD--------FR--K-----P--------VN---------PI----E---KQK-----------SISNGTD-AHIRP----LKYYNS-------------------------------------------------------------------------------------------------------------------------------------------------------------------------------------------
>NWWI_scaffold_2032511_Nephrolepis_exaltata
-------------------------------------------------------------------------------------------------------------------------------------------------------MNANTTKGGAIIMGNNIEAPHN---------------------------------VSGVNSC--NKCII---TSNEQAIQVNGS----------------------LSPQ--------------------------------------------------------------ADVTSPRRPSLWYEEE-----------------IDE-NLRWS--------------FGLTSILHTGVSKFQEIALLD---TQ-PFGKVLTLDRKMQSAERDEWVYHECLVHPALL--LHHS-PK----------------------S-----IYIMGGGEGSTAREALRHRS-----VRKVVMCDIDEEVVKFCSAHLSV----NRE------A-FQ--S---SRLELVIND------------------AKAELESR-----------TERFDIIVGDLAD-P--L-EWG-----P-CYLLYS--KGFYQNIVKPKLN-PGGILVTQAGPAGILSHKEVFTSIFN--TLKHV-F---------------K-YVVAYS-AHVPSYA--------------DTWG--WVM----ASD----------Q---P---------------------FT--Q-----I---SAIDELD--------CKI----K---QRI-----------------K-G---E----LRYLDG-ATLHAATILNKEV-RQ---SLANEKH----VYT----EDSAR-----------FVY---GHG-RSTC-AH*-------------------------------------------------------------------------------------------------------------------
>OAEZ_scaffold_2026902_Persursaria_percursa
----------------------------------------------------------------------------------------------------------------------------------------------------------------------------------------------------------------------------------MTEDGSRRI---------------------------------------------------------------------------------------------------WLEED-----------------ISE-HLRWS--------------ISLKSILNAGQSNFQAYELVD---TY-QFGKLLMLDGKLQSAEKDERAYHECLVQPAML--HHPN-PR----------------------T-----VFICGGGEGATAREVLRHAS-----VEKCVMADIDEAVCNFCRDHLEM----NRA------A-FE--D---PRLELIYDD------------------ARAQLEHY-----------PGTFDVIIGDLAD-P--V-FGG-----P-CYQLYT--DDFYKNVVTKKLN-PGGIFVTQSGPCGVLTANEVFTPIHN--TLKAS-F---------------P-KVIPYS-CHIPSFA--------------DEWG--WNL----AFK---------DG---G-----------EV--------MS--E-----E-------------------SL----D---AKI-------------KEMGK-S---E----LFFLDG-CTWQRVRALSRPV-RK---MVAEEKH----ILS----VDNPK-----------FIH---GQG-VKTL-V*--------------------------------------------------------------------------------------------------------------------
>OAEZ_scaffold_2027715_Persursaria_percursa
----------------------------------------------------------------------------------------------------------------------------------------------------------MIARVSRIACNQWLYSRSC---------------------------------HRFLCRG--TWRLS---PSSLPMPQDAST----------------------TKDG-------------------------------------------------------------------------WFTEL---------------------STLWP------G---QGLSLKVKEVLFKERSQFQDVVVFD---SESVYGRVLTLDGVIQVTEFDEFSYQEMITHLPLC--GMPHAPE----------------------R-----VLIIGGGDGGVAREIAKHVS-----VQCIDMAEIDSMVPEVSKRFFPQ----LAA------G-FN--D---KRLNLQITD------------------GVKWLEEC----------DEGTYDAIIVDSSD-P--V---G-----P-AEVLFQ--EPFFRLVHRA-LR-PGGLLSTQG--ESMWIHLDIIESVAK--MCQDV-F---------------EGGAVNYAFTTIPTYP---------S----GQIG--FMI----CQK-------ANEG---V---------------------AT--G-----A--------TE---------PR--------REL-----------------------PPES-TNYYHP-ALHRAAFVLPAFVCKR---LEQHLSK-----------QGAS*------------------------------------------------------------------------------------------------------------------------------------------------
>OCZL_scaffold_2001928_Homalosorus_pycnocarpos
-----------------------------------------------------------------------------------------------------------------MEAPHSASPSPRGVPSISSHTEKAAFLGSSSSSSSSSPSLSTHGVAVDSSLKPLCSSSTL--------------------ASSGATCTSSPELCSVSSSA--ALMEG---VKPGSGRANISS----------------------VIPG-------------------------------------------------------------------------WFSEV---------------------SPMWP------G---EAHSLEVKEILFEGKSEYQDVLVFQ---SA-TYGKVLVLDGVIQVTERDECAYQEMITHLPLC--SIPN-PR----------------------K-----VLVIGGGDGGVLREVARHKS-----VEQVDICEIDKMVIDVAKKYFPH----IAV------G-FA--D---PRVNLFVGD------------------GAVFLKEV----------SDDFYDAVIVDSSD-P--V---G-----P-AQQLFE--TPFFESLARV-LR-PGGVVCTQA--ESLWLHMPIIKDIFS--ACRKT-F---------------K-GSVNYAWTSVPTYP---------S----GTIG--FML----CST---------EG---P--------A--VN--------FR--Q-----P--------IN---------PI----E---KLE------------EADTNV-R---P----LKFYNS-EMHSSAFCLPQFA-LQ---ALDNTN*----------------------------------------------------------------------------------------------------------------------------------------------------------------
>OFUE_scaffold_2045971_Lobochlamys_segnis
--------------------------------------------------------------------------------------------------------------------------------------------------------------------MSENCAKRL-----------------------------------------------------------------------------------------------------------------------------------------------------------------WLEED-----------------LSD-DHRWT--------------YRLSKVLYSGRSKFQEIDLVE---TP-TFGRVLLLDGKMQSAETDEILYHELLVHPAML--HHPN-PR----------------------N-----IFIMGGGEGATARECLRYAS-----VEKVVMADIDKVVCNACAEHLPR----NAA------A-FS--N---PKLHLVHDD------------------ARAHLESF----------PANSFDVIISDLAD-P--L-EGG-----P-CYQLYT--QEFYKSVVKDRLA-PGGIFITQSGPAGFNTCTEVFTCINQ--TLTSV-F---------------P-AVVPYA-QHIPSFC--------------DCWG--YNL----AFR---------DD---P---------------------LR--I-----L-DAN---------------EM----D---AAA-------------AARVS-G---D----LLYLDG-ATWVGVRYLNKAV-RK---ALDHETQ----IYT----VECGR-----------FIH---GSG-AVK*-----------------------------------------------------------------------------------------------------------------------
>OFUE_scaffold_2046012_Lobochlamys_segnis
---------------------------------------------------------------------------------------------------------------------------------------------MLVRRLSPFRCPNYVSTRASLVACAPCAAAAV---------------------------------PGMTDVANTSTNED---KQPGSADQALGA----------------------VTAG-------------------------------------------------------------------------WFTEL---------------------SALWP------G---QGLSLKVDEVLFRGKSDYQDVVVFE---SQ-AYGTVLALDGIIQATDRDEFAYQEMITHIPLC--CQEHAPK----------------------R-----ALLVGGGDGGVLRELARYPS-----LEEIHIAEIDGMVPEVSKKFFPK----MAV------G-FS--D---PRVKVHICD------------------GIKFVQDA----------AEGSYDVIIVDSSD-P--V---G-----P-AEVLFE--KPFFEALHRA-VA-PGGVVCTQA--ESLWLHLDIIKALAS--MCKDV-F---------------VGGCVAYAYTTIPTYP---------S----GQIG--MMT----CTK------ARAHG-SAP-----------LD--------PR--V-----P--------RQ---------PL--------PGP-------------VPSLGIG---E----LQYYTA-EVHAAAFALPKFA-KD---ALGPCLS----TY*---------------------------------------------------------------------------------------------------------------------------------------------------------
>AQFM_scaffold_2002224_Pseudolarix_amabilis
---------------------------------------------------------------------------------------------------------------MLSRTLHHRLSLKLLCHCKSVKERNIIKTMAEVNVNVNVNANAGVSKRLRAKGEEETENGAS---------------------------------GVEEFEP-LCGEKA---KGGVPQGGCICS----------------------VIPG-------------------------------------------------------------------------WFSSV--------KSPEASTNLQYFNNPMWP------G---EAHSLKVEKVLYKGKSEYQDVMVFQ---SS-SYGKVLVLDGVVQLSEKDEFAYQEMIAHLPLC--SIPS-PK----------------------K-----VLVVGGGDGGVLTEISRHRS-----VEQIDICEIDKMVIDVSKQFFPE----LGV------G-YE--D---PRVRLHIGD------------------GAAFLREC----------SAGAYDAIIVDSSD-P--V---G-----P-AQELFE--RPFYETVARA-LR-PGGVVITQA--ESLWLHMHVIRDIFS--ACRQA-F---------------K-GSVNYAWTSVPTYP---------S----GTIG--FMI----CST---------EG---P----------PVN--------FK--V-----P--------IN---------PI----E---KHS-------------AATNLRG---P----LKFYNS-EMHAAAFSLPTFV-RK---ALGPLLA------------PSL*------------------------------------------------------------------------------------------------------------------------------------------------
>AQFM_scaffold_2002225_Pseudolarix_amabilis
-------------------------------------------------------------------------------------------------------------------------------------------MAESKDTHPVFYVPAKRMKSEEKVENQNGCAAKT---------------------------------AEEQRPL--SCAKA---RGGGELQGGCIS---------------------PVIKG-------------------------------------------------------------------------WFSQV------PVKSHGTATNVQYFNNPMWP------G---ETQSLQVEKILFEGKSKYQDLMVFQ---SV-TYGKVLLLDGVIQLTEKDECAYQEMIAHLPLC--SIPS-PR----------------------K-----VLVVGGGDGGVLREVSRHGS-----VEEIDICEIDEMVIDVSKQFFPD----LAV------G-YQ--D---PRVRLHIAD------------------GAAFLREC----------QPETYDAIIVDSSD-P--V---G-----P-AQELFE--KPFYEIVARA-LR-PGGVVISQA--ESLWLHMHVIQDILS--ACRQT-F---------------K-GSVHYAWTSVPTYP---------S----GTIG--FVI----CST---------EG---P----------AVD--------FR--N-----P--------VN---------PI----E---EQK-------------AATKSRG---P----LKYYNS-EMHAAAFALPIFV-RK---ALEPLLV------------PSS*------------------------------------------------------------------------------------------------------------------------------------------------
>AUDE_scaffold_2011855_Widdringtonia_cedarbergensis
-----------------------------------------------------------------------------------------------------------------MLGRILLPHLRLSCNTGGKSIITRLTMAESKDTHPVLDVAAKRKRAEENVESNNVFATKT---------------------------------VEEERPL-SCYKAR---GGGELQGGCISP----------------------VIKG-------------------------------------------------------------------------WFSQV------PVKSHGTDSNSQYFNNPMWP------G---ETHSLKVEKILFEGKSQYQDLLVFQ---SF-TYGKVLVLDGVIQLTEKDECAYQEMIAHLPLC--SIPS-PR----------------------K-----VLVVGGGDGGVLREVSRHHS-----LEQIDICEIDEMVIKVSKQFFPD----LAV------G-YE--D---PRVRLHIGD------------------GAAFLREC----------QAGTYDAIIVDSSD-P--V---G-----P-AQELFE--KPFYELVARA-LR-PGGVAISQA--ESLWLHMHVIQDIVS--ACRQT-F---------------K-GSVHYAWTSVPTYP---------S----GAIG--FVI----SST---------EG---P----------AVD--------FR--N-----P--------VN---------PI----E---EQE-------------AATKLRG---P----LKYYNS-EVHAAAFALPEFV-KK---SLDPLLV------------PSS*------------------------------------------------------------------------------------------------------------------------------------------------
>BUWV_scaffold_2053838_Platycladus_orientalis
------------------------------------------------------------------------------------------------------------------------------------------------MAEINVHANANVSKRLRAKGEEEAENGAS---------------------------------GEEEFGP-LCCEKA---NGGVPHGGCISS----------------------VIPG-------------------------------------------------------------------------WFSSV--------KSPEAPTNLQYFNNPMWP------G---EAHSLKVEKVLFKGKSEYQDVMVFQ---SS-SYGKVLVLDGVVQLSEKDECAYQEMIAHLPLC--SITS-PK----------------------K-----VLVVGGGDGGVLREISRHRS-----VEQIDICEIDKMVIDVSKQFFPE----LGV------G-YE--D---PRVRLHIGD------------------GAAFLRES----------SAGTYDAIIVDSSD-P--V---G-----P-AQELFE--RPFYETVARA-LR-PGGVVITQA--ESLWLHMHVIQDIFS--ACRQA-F---------------K-GSVNYAWTSVPTYP---------S----GTIG--FMI----CST---------EG---P----------PVN--------FK--V-----P--------IN---------PI----E---KQS-------------AAANLRG---P----LKFYNS-EMHASAFALPTFV-RK---ALGPLLA------------PSL*------------------------------------------------------------------------------------------------------------------------------------------------
>IOVS_scaffold_2055450_Pseudotsuga_menziesii
----------------------------------------------------------------------------------------------------------------------------------------------MAEVNVNVNVNAGVSKRLRAKGEEETENGAS---------------------------------GEEEFRP-VCREKA---RGGEPQGGCISS----------------------VIPG-------------------------------------------------------------------------WFSSV--------KSPEVPKNLQYFNNSMWP------G---EAHSLKVEKVLFKGKSEYQDVMVFQ---SS-SYGKILVLDGVVQLSEKDECAYQEMIAHLPLC--SIPS-PK----------------------K-----VLVVGGGDGGVLREISRHRS-----VEQIDICEIDKLVIDVSKQFFPE----LGV------G-YE--D---PRVRLHIGD------------------GAAFLREC----------PAGTYDAIIVDSSD-P--V---G-----P-AQELFE--RPFYETVSRA-LR-PGGVVITQA--ESLWLHMHVIQDIFS--ACRQA-F---------------K-GSVSYAWTSVPTYP---------S----GTIG--FMI----CST---------EG---P----------PVN--------FK--V-----P--------IN---------PI----E---KQS-------------AATNLRR---P----LKFYNS-EMHAAAFALPTFV-RK---ALGPLLA------------PSL*------------------------------------------------------------------------------------------------------------------------------------------------
>JDQB_scaffold_2011363_Neocallitropsis_pancheri
---------------------------------------------------------------------------------------------------------------MLSRTLHHRLSLKLVCHCKSVKERNIIKTMAEVNVNVNVNANAGVSKRLRAKGEEETENGAS---------------------------------GVDEFGP-LCGEKA---KGGVPEGGCICS----------------------VIPG-------------------------------------------------------------------------WFSSV--------KSPEASTNLKYFNNPMWP------G---EAHSLKVEKVLFEGKSEYQDVMVFQ---SS-SYGKVLVLDGVVQLSEKDEFAYQEMIAHLPLC--SIPS-PK----------------------K-----VLVVGGGDGGVLTEISRHRS-----VEQIDICEIDKMVIDVSKQFFPE----LGV------G-YE--D---PRVRLHIGD------------------GAAFLREC----------SAGAYDAIIVDSSD-P--V---G-----P-AQELFE--RPFYETVARA-LR-PGGVVITQA--ESLWLHMHVIRDIFS--ACRQA-F---------------K-GSVNYAWTSVPTYP---------S----GTIG--FMI----CST---------EG---P----------PVN--------FK--V-----P--------IN---------PI----E---KHS-------------AATNLRG---P----LKFYNS-EMHAAAFSLPTFV-RK---ALGPLLA------------PSL*------------------------------------------------------------------------------------------------------------------------------------------------
>JUWL_scaffold_2017798_Keteleeria_evelyniana
-----------------------------------------------------------------------------------------------------------------MLGRISLHHPRLYCNTRGKSIITRLTMAESKDAHPVFEVPAKRFKSEEKVENQNGCVAKT---------------------------------TEEQRPL-LCAKAR---GGGELQGGCISP----------------------VIKG-------------------------------------------------------------------------WFSQV------LVKSHGTATNMQYFNNPMWP------G---ETHSLQVEKILFEGKSEYQDLMVFQ---SV-TYGKVLVLDGVIQLTEKDECAYQEMIAHLPLC--SIPS-PR----------------------K-----VLVVGGGDGGVLREVSRHGS-----VEEIDICEIDEMVINVSKQFFPD----LAV------G-YQ--D---PRVRLHIAD------------------GAAFLREC----------QPGTYDAIIVDSSD-P--V---G-----P-AQELFE--KPFYELVARA-LR-PGGVVISQA--ESLWLHMHVIQDIIS--ACRQT-F---------------K-GSVHYAWTSVPTYP---------S----GAIG--FVI----CST---------EG---P----------TVD--------FR--N-----P--------VN---------PI----E---EQK-------------AAAKSRG---P----LKYYNS-EMHAAAFILPTFV-RK---ALDPLLV------------PSS*------------------------------------------------------------------------------------------------------------------------------------------------
>JZVE_scaffold_2001398_Parasitaxus_usta
-----------------------------------------------------------------------------------------------------------------MLGRISLPHLRLSFNTGRRSIGTRLIMAESKDTHPVFDVPAKRMKPEEKVESKNGCAAKT---------------------------------IEENRPL--SCAKA---RGGGELQGGCIS---------------------PVIKG-------------------------------------------------------------------------WFSEA------RVKSHGTDTNLQYFNNPMWP------G---ETHSLKVEKILFEGRSQYQDLMVFQ---SV-TYGKVLVLDGVIQLTEKDECAYQEMIAHLPLC--SIPS-PR----------------------K-----VLVVGGGDGGVLREVSRHRS-----VEQIDICEIDEMVINVSKQFFPD----LAV------G-YE--D---PRVTLNIAD------------------GAAFLREC----------QAGTYDAIIVDSSD-P--V---G-----P-AQELFE--KPFYEIVARA-LR-PGGVVISQA--ESLWLHMHVIQDIVS--ACRQT-F---------------K-GSVHYAWTSVPTYP---------S----GAIG--FVI----CST---------EG---P----------AVD--------FR--N-----P--------VN---------PI----E---EQK-------------GATKSRG---P----LKYYNS-EMHTSAFALPAFV-RK---ALDPLLV------------PSS*------------------------------------------------------------------------------------------------------------------------------------------------
>NRXL_scaffold_2004198_Metasequoia_glyptostroboides
-----------------------------------------------------------------------------------------------------------------MLGRISLPHLRLSCNTGRRSIGTRLMMAESKDTHPVFDVPAKRIKPEEKAESGNCCAAKT---------------------------------IEKKRPL-SCAKAR---GGGELQGGCISP----------------------VIKG-------------------------------------------------------------------------WFSEA------RVKSHGTDTNLQYFNNPMWP------G---ETHSLKVEKILFEGRSQYQDLMVFQ---SV-TYGKVLVLDGVIQLTEKDECAYQEMIAHLPLC--SIPS-PR----------------------K-----VLVVGGGDGGVLREVSRHRS-----VEQIDICEIDEMVINVSKQFFPD----LAV------G-YE--D---PRVRLNIAD------------------GAAFLREC----------QAGTYDAIIVDSSD-P--V---G-----P-AQELFE--KPFYEIVARA-LR-PGGVVISQA--ESLWLHMHVIQDIVS--ACRQT-F---------------K-GSVHYAWTSVPTYP---------S----GAIG--FVI----CST---------EG---P----------TVD--------FR--N-----P--------VN---------PI----E---EQK-------------GTTKSRG---P----LKYYNS-EMHAAAFALPAFV-RK---ALNPLLV------------PSS*------------------------------------------------------------------------------------------------------------------------------------------------
>OXGJ_scaffold_2009561_Glyptostrobus_pensilis
----------------------------------------------------------------------------------------------------------------------------------------------------------------------------------------------------------------------------------------------------------------------------------------------------------------------------------------------YF------------------------NNMWP-----------------------GESLYQD-MVFQ---SS-SYGKVLVLDGVVQLSEKDECAYQEMIAHLPLC--SIPS-PK----------------------K-----VLVVGGGDGGVLREISRHSS-----VEQIDICEIDKMVIDVSKEFFPE----LGV------G-YE--D---PRVMLHVGD------------------GAAFLRKC----------PAGTYDAIIVDSSD-P--V---G-----P-AQELFE--RPFYETVARA-LR-PGGVVITQA--ESLWLHMHVIKDIIS--ACRQA-F---------------K-GSVNYAWTSVPTYP---------S----GTIG--FMI----CST---------EG---P----------PVD--------FK--N-----P--------VN---------PI----E---REA-------------AATNLRG---P----LKFYNS-EMHVAAFALPTFV-RK---ALGSLLA------------PSS*------------------------------------------------------------------------------------------------------------------------------------------------
>QNGJ_scaffold_2001028_Cupressus_dupreziana
----------------------------------------------------------------------------------------------------------------------------------------------------------------------------------------------------------------------------------------------------------------------------------------------------------------------------------------------YF------------------------NNMWP-----------------------GESLYQD-MVFQ---SS-SYGKVLVLDGVVQLSEKDECAYQEMIAHLPLC--SIPS-PK----------------------K-----VLVVGGGDGGVLREISRHSS-----VEQIDICEIDKMVIDVSKEFFPE----LGV------G-YE--D---PRVMLHLGD------------------GAAFLREC----------PVGTYDAIIVDSSD-P--V---G-----P-AQELFE--RPFYETVARA-LR-PGGVVITQA--ESLWLHMHVIQDIFS--ACRQA-F---------------K-GSVNYAWTSVPTYP---------S----GTIG--FMI----CST---------EG---P----------PVD--------FK--N-----P--------VN---------PI----E---KQG-------------AATNLRG---P----LKFYNS-EMHMAAFALPTFV-RK---ALGPLLA------------PSS*------------------------------------------------------------------------------------------------------------------------------------------------
>QSNJ_scaffold_2066951_Taiwania_cryptomerioides
---------------------------------------------------------------------------------------------------------------------------------------------------------------MLRPEEDNSGNGNN---------------------------------SVGQIQL-WCEKAK---GGEPLEGGCIST----------------------AIPG-------------------------------------------------------------------------WFSEV----------PEAFTKVQYFNNPMWP------G---EAHSIKVEKILFQGRSEYQDVMVFQ---SL-AYGKVLVLDGVVQLSEKDECAYQEMIAHLPLC--SIPS-PK----------------------K-----VLVVGGGDGGVLREISRHNS-----VEQIDICEIDRMVIDVSKQFFPE----LGV------G-YE--D---PRVRLHVGD------------------GAAFLREC----------PAGTYDAIIVDSSD-P--V---G-----P-AQELFE--QPFYETVARA-LR-PGGVVITQA--ESLWLHMHVIQDIIL--ACRQA-F---------------K-GSVNYAWTSVPTYP---------S----GAIG--FMI----CST---------EG---P----------SVD--------FK--N-----P--------VN---------PI----E---KQE-------------TAKKLRG---P----LKFYNS-EMHAAAFALPAFV-KK---ALDTLRR------------PSS*------------------------------------------------------------------------------------------------------------------------------------------------
>RMMV_scaffold_2055976_Callitris_macleayana
------------------------------------------------------------------------------------------------------------------------------------------MAEPNAVNAVLEDLDIPAKRLRPRGEEREVENGDN---------------------------------GEELRIL-CCEKAR---GGGEPQGGCIST----------------------VIPG-------------------------------------------------------------------------WFSEV----KSLKLLPEAPTKLQYFNNPMWP------G---EAHSLKVEEILFKGKSEYQDVMVFE---TS-SYGKVLVLDGVVQLSEKDEFAYQEMIAHLPLC--SIPS-PK----------------------K-----VLVVGGGDGGVLREISRHSS-----VDQIDICEIDKMVIDVSKQFFPE----LGL------G-YE--D---PRVRLYIGD------------------GAAFLREC----------PAGIYDAIIVDSSD-P--V---G-----P-AQELFE--RPFYETVARA-LR-PGGVAITQA--ESLWLHMHVIQDIIS--ACRQA-F---------------K-GSVNYAWTSVPTYP---------S----GAIG--FMI----CST---------EG---P----------PVD--------FK--N-----P--------VS---------PI----E---KQE-------------CVSKLRG---P----LKFYNS-EMHAAAFALPAFV-RK---ALDPFLA------------QSS*------------------------------------------------------------------------------------------------------------------------------------------------
>RSCE_scaffold_2001901_Wollemia_nobilis
----------------------------------------------------------------------------------------------------------------------------------------------------------------------------------------------------------------------------------------------------------------------------------------------------------------------------------------------YF------------------------NNMWP------G---EAHSIKVEKILFEGKSDYQDVMVFQ---SS-TYGKVLLLDGVVQLSEKDECAYQEMIAHLPLC--SIPS-PK----------------------K-----VLVVGGGDGGVLREISRHSS-----VEQIDICEIDKMVIDVSKQFFPQ----LGV------G-YE--D---PRVRLHIGD------------------GAAFLREC----------PAGTYDAIIVDSSD-P--V---G-----P-AQELFE--RPFYEKVARA-LR-PGGVVITQA--ESLWLHMHIIQDIIV--ACRQA-F---------------K-GSVNYAWTSVPTYP---------S----GAIG--FMI----CST---------EG---P----------PVD--------FK--N-----P--------IN---------PI----E---KQE-------------SATELRG---P----LKFYNS-EMHTAAFALPTFV-RK---ALDPLLI------------PSS*------------------------------------------------------------------------------------------------------------------------------------------------
>WWSS_scaffold_2003079_Taxus_baccata
----------------------------------------------------------------------------------------------------------------------------------------------------------------------------------------------------------------------------------------------------------------------------------------------------------------------------------------------YF------------------------NNMWP------G---EAHSLKVEKVLFKGKSEYQDVMVFQ---SS-SYGKVLVLDGVVQLSEKDECAYQEMIAHLPLC--SIPS-PK----------------------K-----VLVVGGGDGGVLREISRHRS-----VEQIDICEIDKMVIDVSKQFFPE----LGV------G-YE--D---PRVRLHIGD------------------GAAFLREC----------PAGTYDAIIVDSSD-P--V---G-----P-AQELFE--RPFYETVARA-LK-PGGVVITQA--ESLWLHVHVIQDIFS--ACRQA-F---------------K-GSVSYAWTSVPTYP---------S----GTIG--FMI----CST---------EG---P----------PVN--------FK--I-----P--------IN---------PI----E---KQN-------------AATNLRG---P----LKFYNS-EMHAAAFALPTFL-RK---ALGPLLA------------PSL*------------------------------------------------------------------------------------------------------------------------------------------------
>WYAJ_scaffold_2088404_Cephalotaxus_harringtonia
---------------------------------------------------------------------------------------------------------------MLSRTLHHRLSLKLVCHCKSVKERNIIKTMAEVNVNLNVNTNAGVSKRLRAKGEEETENGAS---------------------------------GVEEFGP-LCGEKA---KGGVPEGGCICS----------------------VIPG-------------------------------------------------------------------------WFSSV--------KSPEAPTNLKYFNNPMWP------G---EAHSLKVEKVLFEGKSEYQDVMVFQ---SS-SYGKVLVLDGVVQLSEKDEFAYQEMIAHLPLC--SIPS-PK----------------------K-----VLVVGGGDGGVLTEISRHRS-----VEQIDICEIDKMVIDVSKQFFPE----LGM------G-YE--D---PRVRLHIGD------------------GAAFLREC----------SAGAYDAIIVDSSD-P--V---G-----P-AQELFE--RPFYETVARA-LR-PGGVVITQA--ESLWLHMHVIRDIFS--ACRQA-F---------------K-GSVNYAWTSVPTYP---------S----GTIG--FMI----CST---------EG---P----------PVN--------FK--I-----P--------IN---------PI----E---KHS-------------AATNLRG---P----LKFYNS-EMHAAAFSLPTFV-RK---ALGPLLA------------PSL*------------------------------------------------------------------------------------------------------------------------------------------------
>OQWW_scaffold_2023190_Davallia_fejeensis
-----------------------------------------------------------------------------------------------------------------MAAPYSSSPSSRGESTLSSLTDKTAHLGSSSSSSLPFSAFGVDSPSQRPCCSSVLANSGA-------------------------TCTSSPELLPLRSSA--ARMEG---VKPGSGRANISS----------------------VIPG-------------------------------------------------------------------------WFSEV---------------------SPMWP------G---EAHSLEVKEILFEGKSDFQDVLVFQ---ST-TYGKVLVLDGVIQVTERDECAYQEMIAHLPLC--SISD-PR----------------------K-----VLVIGGGDGGVLREVARHKS-----VEQIDICEIDKMVIDVAKKFFPD----IAV------G-FA--D---PRVNLFVGD------------------GAVFLKGV----------SDGFYDAVIVDSSD-P--V---G-----P-AQQLFE--TPFYESLARV-LR-PGGVVCTQA--ESLWLHMHIIKDIFS--ACRKT-F---------------K-GSVNYAWTSVPTYP---------S----GTIG--FML----CST---------EG---P--------A--VN--------FR--Q-----P--------IN---------PI----E---KIE------------GADTNT-S---P----LKFYNS-GMHSSAFCLPQFA-RQ---VLDFTS*----------------------------------------------------------------------------------------------------------------------------------------------------------------
>OQWW_scaffold_2033038_Davallia_fejeensis
--------------------------------------------------------------------------------------------------------------------------MAACKVGVNQKGDIECLASSAAENYMGDGASPPFDGSPLPPPHHSCHQAKD--------------------QSAFQRMPFHFCCPRGMDPQ--APGAT---ATPGTGRANLSR----------------------GIPG-------------------------------------------------------------------------WYSEI---------------------NSMWQ------G---EAHSLKVEKILFEGKSDFQDVLVFQ---SE-AYGKVLVLDGVIQLTERDECAYQEMITHLPLC--SISN-PK----------------------K-----VLVIGGGDGGVLREISRHDS-----VDQIDICEIDQMVVDVSKKFFPE----LAV------G-YE--D---LRVKLFVGD------------------GAAFLKDA----------PKGIYDAVIVDSSD-P--I---G-----P-AQQLFE--KPFFDLVARA-LR-PGGVLCTQT--ESLWLHLHTIQDLVR--VCRQT-F---------------K-GSINYAWTSVPTYP---------S----GVIG--LML----CST---------EG---P--------V--VD--------FR--K-----P--------VN---------PI----E---EQK-----------SMSNGTD-AHARP----LKYYNS-EMHTAAFCLPQFV-RM---LLEPIIH------------SSA*------------------------------------------------------------------------------------------------------------------------------------------------
>ORJE_scaffold_2008985_Cibotium_glaucum
--------------------------------------------------------------------------------------------------------------------------MEACGVVGLNQKGDIECVPPSAAENRMEDGGGPPFDGSLPSLPHQVKDQGT-----------------------FQRMPFHFCCPRGRDPN--APGAT---ATPGTGRANLSH----------------------GIDG-------------------------------------------------------------------------WYSEI---------------------NSMWQ------G---EAHSLKVEEILYEGKSDYQDVLVFQ---SE-AYGKVLVLDGVIQLTERDECAYQEMITHLPLC--SIPN-PK----------------------K-----VLVIGGGDGGVLREISRHNS-----VDQIDICEIDQMVVDVSKKFFPE----LAV------G-YE--D---PRVKLFVGD------------------GAAFLKDV----------PKGLYDAVIVDSSD-P--I---G-----P-AQQLFE--KPFFDLVARA-LR-PGGVLCTQT--ESLWLHMHTIQDLFK--VCRQT-F---------------K-GSINYAWTSVPTYP---------S----GVIG--LML----CAT---------EG---P----------AVD--------FR--N-----P--------VN---------PI----E---KQE------------SISNGAEAPTRP----LKYYNS-EMHTAAFCLPQFV-RM---LLEPIIC------------APS*------------------------------------------------------------------------------------------------------------------------------------------------
>ORJE_scaffold_2013407_Cibotium_glaucum
-------------------------------------------------------------------------------------------------------------------------------------------------------------MEGSCCPKAAETSTTT---------------------------------DASLPFP--TSSKG---AAVLQAPDEVGA---------------------------------------------------------------------------------------------QRRPGVWYAEE-----------------IEQ-SLRRC--------------LGIKSVLQTGSSKYQDIALLE---TD-PFGTVLIIDNKMQSAELDEWVYHEALVHPALL--FHPR-PS----------------------S-----VFIMGGGEGSTAREVLRHKS-----VAKVVMCDIDEDVVSFCSMHLSV----NRD------T-FC--S---SRLEVIVKD------------------ARAELQDR-----------VEQFDVVIGDVAD-P--V-EGS-----S-CFCLYT--KDFYTNVVKPRLS-FGGVFITQGGPAGILSHEEVFSSVYN--TLRSV-F---------------A-YVIPYA-AHVPSYA--------------DTWG--WVM----ASD----------R---P---------------------FPDIS-----P--------QG----------L----D---VQI-------------SQRIK-G---E----LRYLDG-ETLAAMRILNKMV-RK---RLESETN----VYM----EEIA*------------------------------------------------------------------------------------------------------------------------------------------------
>ORJE_scaffold_2016965_Cibotium_glaucum
------------------------------------------------------------------------------------------------------------------MVACPFSCSSSSQSKSTEKTAHLCSSTSSSLPSSAFGVDSPSHRTCCCTLLAASGAACT---------------------------------PSLGSSS--ARMEG---VKPGSGRANISS----------------------VIPG-------------------------------------------------------------------------WFSEV---------------------SPMWP------G---EAHSLEVKEILFEGKSDFQDVLVFQ---SA-TYGKVLVLDGVIQVTERDECAYQEMITHLPLC--SIPN-PR----------------------K-----VLVIGGGDGGVLREVARHKS-----VEQIDICEIDKMVIDVAKKFFPH----IAV------G-FA--D---PRVNLFVGD------------------GAVFLKGV----------SDRFYDAVIVDSSD-P--V---G-----P-AQQLFE--TPFFESLARV-LR-PGGVVCTQA--ESLWLHMHIIKDIFS--ACRAT-F---------------K-GSVNYAWTSVPTYP---------S----GTIG--FML----CST---------EG---P--------A--VN--------FR--Q-----P--------IN---------PI----E---KIE------------GADTNT-Q---P----LRFYNS-EMHSSAFCLPQFA-RE---VLDYTS*----------------------------------------------------------------------------------------------------------------------------------------------------------------
>ORKS_scaffold_2058417_Philonotis_fontana_79
---------------------------------------------------------------------------------------------------------------------------------------------------------------MVKGESNGVHVNGT---------------------------------SHQSPPA-ATLAKA---TAASAEPKKRCL---------------------------------------------------------------------------------------------------WFEEE-----------------LEE-DLRWV--------------FGVSKILHTGVSEFQDIELVE---SG-PFGKVLILDGKLQSAEADEYVYHESIVHPALL--YHSN-PK----------------------N-----VFIMGGGEGSTAREALKHRS-----VEEVVMCDIDEEVVNFCRKHLTV----NAE------A-FS--S---NRLELVINC------------------ARAELEKR-----------TEQFDIIIGDLAD-P--V-AGG-----P-CYQLYT--KSFYECILKPRLK-EGGMLVTQGGPAGILSHTEVYSSIYN--TLRQT-F---------------K-YVVPYA-AHVPSYA--------------DTWG--WVM----ASD----------Q-PIP---------------------TI--S-----P---------D---------ET----D---SRM-------------KQRIA-G---E----LKFLDG-QTLAATIALNKHV-RK---SLAAEQH----VYT----EETAR-----------FIH---GHGTALKN*----------------------------------------------------------------------------------------------------------------------
>Osativa|LOC_Os02g15550
---------------------------------------------------------------------------------------------------------------------------------------------MEGGGARNGSTTGAARTGGSGGDAAAGGGGGS---------------------------------AGNGKPL-PPCCVKARAAAPESEAKCHAT----------------------VVSG-------------------------------------------------------------------------WFTEP-------RSRGGKTSKVQYYNNPMWP------G---EAHSLKVEKILYQGKSPYQEVLVFE---SS-TYGKVLVLDGIVQLTDKDECAYQEMITHLPLC--SIPS-PK----------------------K-----VLVIGGGDGGVLREICRHGS-----VESIDICEIDQLVIDVCKDFFPD----LSV------G-FK--D---PRVRLHVGD------------------AVEFLRNA----------PEGTYDAIIVDSSD-P--I---G-----P-AQELVE--KPFFDTIARA-LR-PGGVLCNQA--ESMWLHTHLIQDMLS--ICRET-F---------------K-GSVHYAWTSVPTYP---------R----FFIRFHFLL----LSI------------------------------------FC-----------------MQ--------------------------------------------------ARFYD*-------------------------------------------------------------------------------------------------------------------------------------------------------------------------------------------
>Osativa|LOC_Os06g33710
-----------------------------------------------------------------------------------------------------------------------------------------------------MEGGGAKDGSAAAAQTRGSGDDGS---------------------------------HKPLPPCCLKAKA----AAAESEAKCHAT----------------------VVSG-------------------------------------------------------------------------WFTEP-------RSHSGKTSKVQYFNNPMWP------G---EAHSLKVENILYQGKSPYQEILVFE---SS-TYGNVLVLDGIVQLTEKDECAYQEMVTHLPLC--SIPS-PK----------------------S-----VLVVGGGDGGVLREIARHAS-----VENIDICEIDQLVIDVCKDFFPQ----LSV------G-FK--D---PRVQLHVGD------------------AVDFLRNA----------PEGKYDAIIVDSSD-P--I---G-----P-AQELVE--KPFFQTIARA-LK-PGGVLCNQA--ESMWLHTHLIQDMLS--ICRET-F---------------K-GAVHYAWTSVPTYP---------S----GVIG--FLL----CAK---------EG---P----------AVN--------FL--S-----P--------VN---------PI--------EKL-------------EGAMEAG--RE----IRFYNS-EVHRAAFVLPTFV-RR---ELESHNTCAEKDKSETKPVAKPK-----------KMKIMPNSAIPTAS*----------------------------------------------------------------------------------------------------------------------
>Osativa|LOC_Os07g22600
------------------------------------------------------------------------------------------------------------------------------------------------------------MEAEAAAKRARESGDAA--------------------------------------------------AAGAGEQAGISA----------------------VIPG-------------------------------------------------------------------------WFSEI---------------------SPMWP------G---EAHSLKVEKVLFQGKSDYQNVMVFQ---SS-TYGKVLVLDGVIQVTERDECAYQEMITHLPLC--SIKD-PK----------------------K-----VLVIGGGDGGVLREVSRHSS-----VEQIDICEIDKMVVDVSKQFFPH----LAV------G-FE--D---PRVSLHIGD------------------GVAFLKNA----------PEGTYDAVIVDSSD-P--I---G-----P-AQELFE--KPFFQSVARA-LR-PGGVVCTQA--ESIWLHMHIIEDIVA--NCRQV-F---------------K-GSVNYAWTTVPTYP---------S----GVIG--FML----CST---------EG---P----------TVD--------FQ--H-----P--------IF---------NI----E---DNE-------------FSTKSKG---P----LKFYNS-EIHSASFCLPSFA-KR---VIGSKAN--------------*-------------------------------------------------------------------------------------------------------------------------------------------------
>OVIJ_scaffold_2083095_Papuacedrus_papuana
-------------------------------------------------------------------------------------------------------------------------------------------------------------------------------------------------------------------------------MSPSFGDGRRRC--------------------------------------------------------------------------------------------------FWYEEE-----------------IED-DLRWC--------------FALNRILHTGVSEYQDIALID---TR-PFGKALVIDGKMQSTEVDEFIYHESLVHPALV--YHSQ-PK----------------------S-----AFIMGGGEGSTAREILRHKC-----VKKVVMCDIDKEVVDFCKKYLVV----NRE------A-FN--N---SRLDLVIND------------------ARTELQNR-----------QERFDVIIGDLAD-P--V-EGG-----P-CYQLYT--KSFYELVIKPKLN-PQGIFVTQAGPAGVLTHTQVFSSIYN--TLRQV-F---------------K-HVIPYS-AHIPSFA--------------DTWG--WVM----ASD----------H---P---------------------LT--L-----E--------AQ---------EI----D---NRI-------------KQRVK-G---E----LQFLDG-QTFLVAATLNKSV-RM---SLSKETH----VYT----EETAR-----------FIH---GHGKASYQ*----------------------------------------------------------------------------------------------------------------------
>OVIJ_scaffold_2084657_Papuacedrus_papuana
-------------------------------------------------------------------------------------------------------------------------------------------------MADNNISNGASSVALDLPIKRPRSQEEI---------------------------------DNHSAPP--SLQET---TMEDGAAESYPS----------------------VIPG-------------------------------------------------------------------------WFAEM---------------------SPMWP------G---EAHSLKVEKVLFHDKSDFQDVIVFE---SA-TYGKVLVLDGVIQLTERDECAYQEMITHLPLC--SIPN-PK----------------------K-----VLVIGGGDGGVLREVSRHNS-----VEQIDICEIDGMVVNVSKEFFPN----IAV------G-FQ--D---PRVNLSIGD------------------GVAFLKDC----------PEGTYDAVIVDSSD-P--I---G-----P-AEELFK--KPFFESVARA-LR-PGGVVCTQA--ESMWLHMPIIEDIVN--VCRQT-F---------------K-GSVNYAWTTVPTYP---------S----GMIG--FML----CST---------EG---P----------PVD--------FR--H-----P--------IN---------AI----D---KQE-------------CNLKCLG---P----LRFYNS-EMHTAAFCLPAFA-RR---AIGSKVQ-----------SSSS*------------------------------------------------------------------------------------------------------------------------------------------------
>OWFC_scaffold_2006687_Halocarpus_bidwillii
------------------------------------------------------------------------------------------------------------------------------------------------------MAGNSKDLNNGSVLDLPIKRSRP---------------------------------EEQIIQQ--STMAK---LDGAALDNCYPS----------------------VIPG-------------------------------------------------------------------------WFSEM---------------------SAMWP------G---EAHSLKCEKVLFRGKSDYQDVMVFQ---SS-TYGKVLVLDGVIQLTERDEFAYQEMISHLPLC--SVPN-PK----------------------K-----VLVIGGGDGGVLREVSRHNS-----VEQIDICEIDGMVVDVSRDFFPH----LAI------G-FA--D---PRVKLHIGD------------------GVAFLKDS----------AEGTYDVVIVDSSD-P--I---G-----P-AEELFK--RPFFESVAKV-LR-PGGVMCTQA--ESIWLHMHIIEDIVT--VCSQT-F---------------K-GSVNYAWTSVPTYP---------S----GVIG--FML----CST---------AG---P--------E--VD--------FQ--H-----P--------IN---------PI----D---KQE------------SNAKSL-G---P----LKFYNA-EMHTAAFCLPAFA-RR---TIGPKVQ-----------PSSS*------------------------------------------------------------------------------------------------------------------------------------------------
>OWFC_scaffold_2008081_Halocarpus_bidwillii
-----------------------------------------------------------------------------------------------------------------------------------------------------MAENLEFGAKMLRPEKEDCGNENN---------------------------------GVGQIQL-CCEKAK---GGEHLEGGCIST----------------------VIPG-------------------------------------------------------------------------WFSEV----NKSLKMPEAFAKVQYFNNPMWP------G---EAHSIKVEKILFQGRSEYQDVMVFQ---SS-TYGKVLVLDGVVQLSEKDECAYQEMIAHLPLC--SIPS-PK----------------------K-----VLVVGGGDGGVLREISRHNS-----VEQIDICEIDRMVIDVSKQFFPQ----LGV------G-YE--D---PRVRLHVGD------------------GAAFLREC----------PAGEYDAIIVDSSD-P--V---G-----P-AQELFE--QPFYETVARA-LR-PGGVVITQA--ESLWLHMHVIQDIIL--ACRQA-F---------------K-GSVNYAWTSVPTYP---------S----GAIG--FMI----CST---------EG---P----------SVD--------FK--N-----P--------IN---------PI----E---KQE-------------TAKKLKG---P----LKFYNS-EMHAAAFALPAFV-RK---ALDTLLQ------------PSS*------------------------------------------------------------------------------------------------------------------------------------------------
>OWFC_scaffold_2013259_Halocarpus_bidwillii
---------------------------------------------------------------------------------------------------------------------------------------------MADSSVNFNNGMTDSSSLDLPIKRHRIEGGGA---------------------------------SEESKFG--HCSVM---ENGAIANGSYPS----------------------VIPG-------------------------------------------------------------------------WFAEM---------------------SPMWP------G---EAHSLKVEKVLFRGKSDYQDVMVFE---SS-TYGKVLVLDGVIQLTERDECAYQEMITHLPLC--SVQN-PK----------------------K-----VLVIGGGDGGVLREVSRHNS-----VEQIDICEIDQMVVDVAKEYFPK----LAI------G-FE--D---SRVKLHIGD------------------GVAFLNGC----------PEGTYDAVIVDSSD-P--I---G-----P-AEELFK--KPFFESVARA-LR-PGGVVCTQA--ESIWLHMHIIEDIVD--VCRQT-F---------------K-GSVNYAWTTVPTYP---------S----GVIG--FML----CST---------EG---P--------A--VD--------FQ--H-----P--------IN---------PI----D---KQE------------SNIKSL-G---P----LKFYNS-EIHTASFCLPAFA-RR---VIGSKVQ-----------TIPS*------------------------------------------------------------------------------------------------------------------------------------------------
>OWFC_scaffold_2053949_Halocarpus_bidwillii
-------------------------------------------------------------------------------------------------------------------------------------------MGEVTAASMVPKGLGLGNGHIGCNGYANGNGNGH-----------------AVLLHANCTASAREAISNGVHVPLLPPSNGTISHLPHPTATSFGD---------------------------------------------------------------------------------------------GRRRCFWYEEE-----------------IED-DLRWC--------------FALNRILHTGVSDYQDIALLD---TR-PFGKALVIDGKLQSTEFDEFIYHESLVHPALV--YHSN-PT----------------------S-----AFVMGGGEGSTAREILRHKS-----IKKVVMCDIDQEVVDFCRKYLVV----NKK------A-FS--N---SRLELVIND------------------ARAELESR-----------EERFDLIIGDLAD-P--V-EGG-----P-CYQLYT--KSFYELVIKPKLN-HQGIFVTQAGPAGVLTHTQVFSSIHN--TLRQV-F---------------K-YVVAYS-AHVPSFA--------------DTWG--WVM----ASD----------H---P---------------------LT--L-----E--------AE---------EI----D---VRL-------------KQRVR-G---E----LQFLDG-QTFVAAATLNKSV-RK---SLARETH----VYT----EETAR-----------FIH---GHGKASQL*----------------------------------------------------------------------------------------------------------------------
>Picea_abies_PAB00005990
------------------------------------------------------------------------------------------------------------------------------------------------------------------------------------------------------------------------------------------------------------------------------------------------------------------------------------------------------------------------------------------------------------MVFQ---SL-TYGKVLVLDGVIQLTERDECAYQEMITHLPLC--SVPN-PK----------------------K-----VLVIGGGDGGVLREVSRHMS-----VEQIDICEIDGMVIDVSKQYFPE----IAV------G-FD--D---PRVTVNVGD------------------GVAFLRES----------PEGVYDVVIVDSSD-P--I---G-----P-AEELFK--KPFFELVARA-LR-PGGVMCTQA--ESIWLHMPIIEDIVS--ACRQT-F---------------K-GSVNYAWTTVPTYP---------S----GVIG--FML----CST---------EG---P----------AVD--------FQ--H-----P--------IN---------PI----E---KQE----------------SNVELQRP----LKFYNS-EMHTASFCLPAFA-RR---AIGSNVQ-----------PPLS*------------------------------------------------------------------------------------------------------------------------------------------------
>Picea_abies_PAB00022712
-------------------------------------------------------------------------------------------------------------------------------------------MAEARDSRPALEVPVKCMKSQEVEIQNACAANTT-----------------------------------EEPMPLHCAKAR---GGGEPQGGCIST----------------------VIPG-------------------------------------------------------------------------WFSQV------RVKSPGAATNLHYFNNPMWP------G---EAHSLQVEKILFEGKSEYQDLMVFQ---SV-THGKVLVLDKMIQLTEKDECAYQEMIAHLPLC--SILS-PK----------------------K-----VLVVGGGDGGVLREICRHSS-----VEQIDICEIDEMVINVSKQFFPN----VAV------G-YD--D---PRVRLHIGD------------------GTAFLREC----------LAGIYDAIIVDSTD-P--V---G-----P-AQELFG--KPFYETVSRA-LR-PGGVVISQA--ESLWLHMHVIQAIVT--ACRQT-F---------------K-GSVHYAWTSVPSYP---------S----GTIG--FVI----CSS---------EG---P----------PVD--------FK--N-----P--------VN---------PI----E---EQK-------------AATKLRG---P----LKFYNS-EVHAAAFALPTFV-KQ---ALDDINL-----------*----------------------------------------------------------------------------------------------------------------------------------------------------
>Picea_Abies_PAB00026429**
---------------------------------------------------------------------------------------------------------------------------------------------MGEVAANGFSINGNGHAYNDAYVNRNGTANGH---------------------------------AVHHVNG-NGNGITTAAASNGLPGIRNRA----------------------FGDG--------------------------------------------------------------------RRRCFWYEEE-----------------VEE-NLRWC--------------FALNSILHTGVSNYQDIALLD---TE-PFGKALVIDGKLQSAEVDEFIYHELLVHPALV--CHPN-LK----------------------S-----VFIMGGGEGSTAREILRHKN-----VKKVVMCDIDKEVVDFCRKYLVV----NKE------A-FC--S---SRLELVIND------------------ARAELENR-----------DERFDVIVGDLAD-P--V-EGG-----P-CYQLYT--KSFYELVLKPKLS-HRGVFVTQAGPAGVLTHTEVFSSIYN--TLRQV-F---------------K-YVVPYT-AHIPSFA--------------DTWG--WVM----ASD----------H---P---------------------LT--I-----D--------AE---------EI----D---GRI-------------EQRIK-G---E----LRFLDG-ETFMAASTLNKSV-RT---SLSKETH----VYT----EETAR-----------FVY---GHGKACHKS*---------------------------------------------------------------------------------------------------------------------
>Picea_abies_PAB00028145
-----------------------------------------------------------------------------------------------------------------MLGRILLSHLRLSCNTGGKSIITRLTMAESKDTHPVLDVAAKRKRAEENVESNNVFATKT---------------------------------LEEERPL-SCYKAR---GGGELQGGCISP----------------------VIKG-------------------------------------------------------------------------WFSQV------PVKSHGTDSNSQYFNNPMWP------G---ETHSLKVEKILFEGQSQYQDLLVFQ---SV-TYGKVLVLDGVIQLTEKDECAYQEMIAHLPLC--SIPS-PR----------------------K-----VLVVGGGDGGVLREVSRHHS-----LEQIDICEIDEMVIKVSKQFFPD----LAV------G-YE--D---PRVRLHIGD------------------GAAFLREC----------QAGTYDAIIVDSSD-P--V---G-----P-AQELFE--KPFYELVARA-LR-PGGVAISQA--ESLWLHMHVIQDIVS--ACRQT-F---------------K-GSVHYAWTSVPTYP---------S----GAIG--FVI----SST---------EG---P----------AVD--------FR--N-----P--------VN---------PI----E---EQE-------------AATKLRG---P----LKYYNS-EVHAAAFALPEFV-KK---ALDPLLV------------PSS*------------------------------------------------------------------------------------------------------------------------------------------------
>Picea_abies_PAB00028545
MLMFLPQLFDPPILHMWYGEVEERLCLMMDTTHILVNYGHTPQSWLLVSDAYVSCVSIWMRYYLSLDICLCCPQLLSMASWLHPVVGISSTSLLLLLMLWFLSSFDMARVISSRQGRGGTSRRPVTQSGFRLMDVAEKSADSYHFVTPPEFQTEWTWSRIFLPRLRLSCNTGGKRIITRFVMAESKDTDPIFDVPEKRIKQEEKVESDNDSAAKHIKIEERVESEKDSGAKTLEEERPLSCPKARGGGEIQGGCILPVIKG-------------------------------------------------------------------------WFSEV------QVKSNGTDSILQYFNNPMWP------G---EAQSLQVNKILFEGKSEYQDVMVFE---SV-TYGKVLVLDGVIQLTEKDECAYQEMMAHLPLC--SIPS-PR----------------------K-----VLVIGGGDGGVLREVSRHHS-----VEQIDICEIDEMVIKLSKHFFPK----LAI------G-YE--D---PRVRLHIGD------------------GAAFLREC----------QAGTYDAIIVDSSD-P--V---G-----P-AQELFE--KPFYELVARA-LR-PGGVAISQS--ESLWLHMHLIQDILS--ACRQT-F---------------K-GSVHYAWTSVPTYP---------S----GAIG--FVI----SST---------EG---P----------VVD--------FR--N-----P--------IN---------PI----E---EQK-------------DATKLGG---P----LKYYNS-EMHAAAFVLPAFV-KK---ALAPLLI------------PSS*------------------------------------------------------------------------------------------------------------------------------------------------
>Picea_abies_PAB00036924
-----------------------------------------------------------------------------------------------------------------------------------------------------------MGEVAVKANDNFVNGNGV---------------------------------HEMSGSN-GTVASA---PQLGEGRRRCC----------------------------------------------------------------------------------------------------WYEEE-----------------VDD-DIRLC--------------FALNSILHTGVSHYQEIALLD---TK-PFGK---------SAEMDEFIYHESLVHPALV--HHSN-PK----------------------T-----VFIMGGGEGSTAREILRHMS-----VNKVVMCDIDEEVVDFCKKHLVV----NQE------A-FA--S---PRLDLIIND------------------AR-----------------GECFDVIIGDLAD-P--I-EGG-----P-CYQLYT--KSFYELVVKPKLS-HGGIFVTQAGPAGALSHTEVFSCIYN--TLRHV-F---------------K-FVVPYS-AHIPSFA--------------DTWG--W------ASD----------Q---P---------------------FT--------P--------NS--------REI----D---SRT-------------KQRIE-G---D----LRYFDG-ETFVAASTLNKSWQTKRMCILQRRRD----IFMGMARVTSPA---------------------SKLVHL*--------------------------------------------------------------------------------------------------------------------
>Picea_abies_PAB00056441
----------------------------------------------------------------------------------------------------------------------------------------------------------------------------------------------------------------------------------------------------------------------------------------------------------------------------------------------MIGET--------------------------------------HSLKVEKILFEGQSQYQDLLVFQ---SV-TYGKVLVLDGVIQLTEKDECAYQEMIAHLPLC--SIPS-PR----------------------K-----VLVVGGGDGGVLREVSRHHS-----LEQIDICEIDEMVIKVSKQFFPD----LAV------G-YE--D---PRVRLHIGD------------------GAAFLREC----------QAGTYDAIIVDSSD-P--V---G-----P-AQELFE--KPFYELVARA-LR-PGGVAISQA--ESLWLHMHVIQDIVS--ACRQT-F---------------K-GSVHYAWTSVPTYP---------S----GAIG--FVI----SST---------EG---P----------AVD--------FR--N-----P--------VN---------PI----E---EQE-------------AATKLRG---P----LKYYNS-EVHAAAFALPEFV-KE---ALDPLLV------------PSS*------------------------------------------------------------------------------------------------------------------------------------------------
>Pinus_taeda_ACL5_PTA00024410
---------------------------------------------------------------------------------------------------------------------------------------------MGEVAANGFSINGNGHVYNDAYVNRNGTANGH---------------------------------AVHHANG-NCNGITTAVATNGLPGIRNRA----------------------FGDG--------------------------------------------------------------------RRRCFWYEEE-----------------VEE-NLRWC--------------FALNSILHTGVSNYQDIALLD---TE-PFGKALVIDGKLQSAEVDEFIYHELLVHPSLV--CHPN-LK----------------------S-----VFIMGGGEGSTAREVLRHKN-----VKKVVMCDIDKEVVDFCRKYLVV----NRE------A-FC--S---SRLELVIND------------------ARAELESR-----------DERFDVIVGDLAD-P--V-EGG-----P-CYQLYT--KSFYELVLKPKLS-HRGVFVTQAGPAGVLTHTEVFSSIYN--TLRQV-F---------------K-YVVPYT-AHIPSFA--------------DTWG--WVM----ASD----------H---P---------------------LT--I-----D--------AE---------EI----D---GRI-------------EQRIK-G---E----LRYLDG-ETFMAASTLNKSV-RT---SLLKETH----VYT----EETAR-----------FVY---GHGKACHKS*---------------------------------------------------------------------------------------------------------------------
>PIUF_scaffold_2005228_Pellia_cf._Epiphylla
-----------------------------------------------------------------------------------------------------------------------------------------MTEAITTTTTIHLNGSGTPKGSIVAVGSKRYHMGDS-----------------------------------TPAPI-PHLNGSAMHLNGSAGKKNGSA----------------------VNNG------------------------------------------------------------------NKAKRCLWFEEE-----------------LEE-DLRWV--------------FGVSKILHTGVSEFQDIELVE---SG-PFGKVLILDGKLQSAEADEFVYHESIVHPACL--YHNN-PR----------------------T-----VFIMGGGEGSTAREALKHRS-----VKKVVMCDIDKEVVDFCREHLTA----NAE------A-FR--N---RRLELVIDC------------------ARAELERR-----------EEQFDIIIGDLAD-P--V-DGG-----P-CYRLYT--QSFYERVLKPKLA-PGGILVTQAGPAGILTHKEVYSSIYN--TLRQV-F---------------K-YVVPYA-AHVPSYA--------------DTWG--WIM----ASD----------H---P---------------------FP--------P------FSVE---------ET----D---SRI-------------SNRVT-G---E----LRFLDG-ATMAATFALNKHV-RA---SLHQETH----VYT----EETAR-----------FIH---GHGTAQKH*----------------------------------------------------------------------------------------------------------------------
>PIUF_scaffold_2005316_Pellia_cf._Epiphylla
----------------------------------------------------------------------------------------------------------------------------------------------------------------------MSLPAAG--------------------------------------------------DAAAQSKTNLGS----------------------IMTG-------------------------------------------------------------------------WFSEI---------------------GTMWP------G---EAHSLKIEKQLFEGQSDFQHVQVFQ---SE-TYGKVLVLDGVIQLTERDEFSYQEMITHLPLC--SVKE-PK----------------------K-----VLVIGGGDGGVLKEVSRHSS-----VEHVDICEIDKMVVDVSKEFFPD----LAI------G-FQ--D---PRVNVHIGD------------------GVKFLQDA----------KAGSYDVIIVDSSD-P--V---G-----P-AEGLFQ--KPFYESLARA-LQ-PGGVACTQA--ESIWLHLPIIKEVIS--INAGI-F---------------K-GSVNYAWTSVPTYP---------S----GVIG--FML----CST---------AG---P----------EVN--------FS--K-----P--------IN---------PIEAFVT---SDE-------------SRKLVKG---P----LKYYNS-QIHNAALVLPQFA-KE---ELGDLLT------------SYS*------------------------------------------------------------------------------------------------------------------------------------------------
>PKOX_scaffold_2013617_Isoetes_tegetiformans
---------------------------------------------------------------------------------------------------------------------------------------------MAQAELDVAMADLSSKRPRADEDGAEVLENGT---------------------------------NAAALIS--QDSTA---PAPGTARANLST----------------------VLTG-------------------------------------------------------------------------WFSEI---------------------SPMWP------G---EAHSLKVEKFLFEGKSDFQDVVVFE---SA-TYGKVLVLDGVIQLTERDECSYQEMITHLPLC--SIPN-PK----------------------R-----VLVVGGGDGGVLREVSRHAS-----IEQVDIVEIDKMVVDVAKEFFPS----VAI------G-FE--D---PRVNVHIAD------------------GVAFLRDA----------TPGTYDAIIVDSSD-P--I---G-----P-AQQLFE--MPFFQSMAKA-LR-PGGVVCTQA--ESPWLHMHIIKSIVA--GCRET-F---------------K-GSINYAWTSVPTYP---------S----GVIG--FML----CST---------EG---P----------AVD--------FR--H-----P--------IN---------PI----ENIETAS-------------TQGFAEKHVRPA---LKYYNT-QMHTAAFCLPQFA-RV---ELEPLLT--------------A*------------------------------------------------------------------------------------------------------------------------------------------------
>PKOX_scaffold_2097397_Isoetes_tegetiformans
-----------------------------------------------------------------------------------------------------------------------------------------------------------MGEACINGTLRNSNTNGV---------------------------------SKPNGVS----------LAPRAVSEQKCL---------------------------------------------------------------------------------------------------WFEEE-----------------IEE-DLRWV--------------FSVSRVLHTGISEFQDIALLE---SG-PFGKVLILDGKLQSADADEFVYHESLVHPALL--YHPN-PK----------------------S-----VFIMGGGEGSTAREALKHQS-----VKKVVMCDIDKEVVDFCRAHLSA----NKE------A-FS--N---ARLELVIND------------------ARAELESR-----------DDKFDIIIGDLAD-P--V-DGG-----P-CYKLYT--ESFYQNVVKPRLN-PGGILVTQAGPAGILTHCEVYGSIYN--TLRQV-F---------------K-NVIPYA-AHVPSYS--------------DSWG--WIM----ASD----------H-PIP--------------------KFD-----------------LD---------DV----D---KRI-------------KQRIH-G---E----LRFLDG-HTLGAELALNKLV-RE---SLANETH----IYT----EKSAR-----------FIH---GHGTAKV*-----------------------------------------------------------------------------------------------------------------------
>PKOX_scaffold_2098235_Isoetes_tegetiformans
-------------------------------------------------------------------------------------------------------------------------------------------------------MGGDRLEVKAAANKENISCNGK------------------------------VELHASNGKLEHCNGTKASINRSLAPSRSTNI---------------------------------------------------------------------------------------------------WFEEE-----------------IQE-DLRWV--------------FTISKVLHTGVSEYQDIALTE---TG-PFGKVLVLDGKLQSAEADEFVYHEILVHPALL--NHSS-PQ----------------------S-----VFIMGGGEGSTAREALKHKS-----VKKVVMCDIDKEVVDFCRAHLSD----NRE------A-FQ--S---PRLELVIND------------------ARTELEKR-----------KEKFDVIIGDLAD-P--V-EGG-----P-CYKLYT--ELFYEKIVKPRLN-VGGILVTQAGPAGILSHREVYTSIYN--TLRQV-F---------------K-YVVAYA-THVPSYA--------------DTWG--WVM----ASD----------H-PIP---------------------KL--T--------------SE---------EI----D---LKI-------------KQRIL-G---E----LRFLDG-QGLVASAALNKVV-RL---SLAKETH----VYT----EHSAR-----------FIH---GHGTAEK*-----------------------------------------------------------------------------------------------------------------------
>Pp3c1_32030V3recovered
---------------------------------------------------------------------------------------------------------------------------------------------------------------------------------------------------------------------------------------------------------------------------------------------------------------------------------------------------------------------------------------------------------------Q---SA-TYGRVLVLDGVIQLTQRYECAYQEMIIHLPLC--SIPD-PK----------------------K-----VLVVGGGDGGVLGEIARHKS-----VEQIDICEIDKLVVDVAKEFIPD----VAI------G-FE--D---PRVNLHIGD------------------GVSFLKAV----------PEGTYDAIIVDSSD--------------P-----------------------VGGVICTQA--ESLWLHMRIIKDIVG--ACRHS-S---------------K-GSINYAWTSVPTYLRCTRQHFFCL----NLLGRNWSI----CLH---------HL---HLKRDSNVLC-FIQ--------FL--V-----L--------RD---------RV----E---AQV---------------KKT-LYERQ----RGYFSI-NLLAAYFHLHCDG-KG-------ER*----------------------------------------------------------------------------------------------------------------------------------------------------------------
>Pp3c17_5630V3.1
--------------------------------------------------------------------------------------------------------------MLEEVFVIEVEEVELVVEGEEEGKRGMLLLSSRRYLLARSCSLLRIHAIAMGGHNNSDVGEQQ--------------------QQAAKKPAGSSLNAAELIAQ--SANAT---PAPSTARANLSS----------------------IVPG-------------------------------------------------------------------------WFSEI---------------------SAMWP------G---EAHSLKVEKVLFEGKSDYQDVVVFE---SA-TYGRVLVLDGVIQLTQRDECAYQEMITHLPLC--SIPN-PK----------------------K-----VLVVGGGDGGVLREIARHKS-----VDQIDICEIDKMVVDVAKEFFPD----VAV------G-FE--D---PRVNLHIGD------------------GVAFLREV----------PEGTYDAIIVDSSD-P--V---G-----P-AQALFE--RPFYRTLDQA-LR-PGGVICTQA--ESLWVHMPIIKNIVS--ACRHT-F---------------K-GSINYAWTSVPTYP---------S----GLIG--FML----CSK---------AG---P--------A--VN--------FL--E-----P--------CN---------PI----D---QAI--------------DPEK-SSRRP----MKFYNS-AMHAAAFSLPQFA-KV---ELEHLLT----------PPPSS*------------------------------------------------------------------------------------------------------------------------------------------------
>Pp3c2_2980V3.1
------------------------------------------------------------------------------------------------------------------------------------------------------------MALGRGDDEQAAPESGR---------------------------------NAAELIA--QDNAA---PAPSTARANLSS----------------------IMPG-------------------------------------------------------------------------WFSEI---------------------SPMWP------G---EAHSLKVEKFLFEGKSDYQDVVVFE---SA-TYGRVLVLDGVIQLTQRDECAYQEMITHLPLC--SIPN-PK----------------------K-----VLVVGGGDGGVLREIARHKS-----VEQIDICEIDKLVVDVAKEFFPD----VAV------G-FE--D---PRVNLHIGD------------------GVAFLKAV----------PEGTYDAIIVDSSD-P--V---G-----P-AQALFE--RPFYKTLDRA-LR-PGGVICTQA--ESLWLHMPIIKDIVG--ACRHT-F---------------K-GSINYAWTSVPTYP---------S----GVIG--FML----CST---------AG---P--------A--VN--------FR--K-----P--------CN---------PI----D---QAV--------------DPNH-YSKRP----LKFYNS-AMHEAAFSLPQFA-RE---ELEHLLT----------PPPTS*------------------------------------------------------------------------------------------------------------------------------------------------
>Pp3c27_3260_Physcomitrella_patens
------------------------------------------------------------------------------------------------------------------------------------------------------------MVECLDKEINRVHVNGT-------------------------------------------SHQT---PTPKTVDAEVEP----------------------------------------------------------------------------------------------RKRCLWFEEE-----------------LEE-DLRWV--------------FGVSKILHTGVSEFQNIELVE---SG-PFGKVLILDGKLQSAEADEFVYHESIVHPALL--YHSN-PK----------------------S-----VFIMGGGEGSTAREALRHRS-----VERVIMCDIDEEVVEFCRKHLTV----NGE------A-FR--S---DRLELIINC------------------ARAELVKT-----------TEKFDILIGDLAD-P--V-EGG-----P-CYKLYT--KSFYERVLKPRLK-DGGILVTQGGPAGILSHTEVYSSIYN--TLRKT-F---------------K-YVIPYA-AHVPSYA--------------DTWG--WIM----ASD----------Q---P---------------------FP--K--------------IS-------AEET----D---SRI-------------KHRID-G---E----LKFLDG-EALFASIALNKHV-RK---SLAAERH----VYT----EESAR-----------FIH---GHGTALKN*----------------------------------------------------------------------------------------------------------------------
>Pp3c5_6270_Physcomitrella_patens
----------------------------------------------------------------------------------------------------------------------------------------------------------------MVECFEVECSNAA---------------------------------YGNGTSR--QTAVS---NGASHQSSVTKT----------------------VLPA----------------------------------------------------------------EAEHKKRCLWFEEE-----------------LEE-DLRWV--------------FGVSKILHTGVSEFQDIELVE---SG-PFGKVLILDGKLQSAEADEFVYHESIVHAALL--YHPN-PK----------------------N-----VFIMGGGEGSTAREALKHRS-----VEKVVMCDIDEEVVNFCRKHLTV----NAE------A-FR--S---KRLDLIINC------------------ARAELEKK-----------TEKFDIIVGDLAD-P--V-AGG-----P-CYQLYT--KSFYERVLKPSLK-DGGILVTQGGPAGILTHTEVYSSIYN--TLRQT-F---------------K-YVVPYA-AHVPSYA--------------DTWG--WIM----ASD----------E---P------------I-----PTISA--E-----T--------TD--------NRI----K---ERI-----D-------------G---E----LKFLDG-QTLSAAIALNKHV-RR---SLAAERH----VYT----EETAR-----------FIH---GHG-TALK-N*--------------------------------------------------------------------------------------------------------------------
>Pp3c6_27380_Physcomitrella_patens
---------------------------------------------------------------------------------------------------------------------------------------------------------MVEFFEESSSNGVHVNGTTH---------------------------------QTSASNR--TSHQP---SATKTAAAAEAE---------------------------------------------------------------------------------------------PKKRCLWFEEE-----------------LEE-DLRWV--------------FGVSKILHTGVSEFQDIELVE---SG-PFGKVLILDGKLQSAEADEFVYHESIVHPALL--YHSN-PK----------------------S-----VFIMGGGEGSTAREALRHRS-----VEEVVMCDIDEEVVNFCRKHLTV----NAE------A-FR--S---NRLELVINC------------------ARAELENR-----------TEQFDIIIGDLAD-P--V-AGG-----P-CYQLYT--KSFYEHVLKPRLK-DGGILVTQGGPAGILTHTEVYSSIYN--TLRQT-F---------------K-YVVPYA-AHVPSYA--------------DTWG--WIM----ASD----------Q---P-------IP--AI--------SA--E-----E--------TN--------LRI----K---QRI-----------------N-G---E----LKFLDG-QTLSATHALNKHV-RN---SLAAERH----VYT----EETAR-----------FIH---GHG-TASK-N*--------------------------------------------------------------------------------------------------------------------
>Ppersica|Prupe.1G011700
-----------------------------------------------------------------------------------------------------------------------------------------------------MGDISYSNGTNNGNGNGNGNGNGN---------------------------------GNGVNGK----------AHSVLNGYRKSC---------------------------------------------------------------------------------------------------WYEEE-----------------IEE-NLRWS--------------FALNSILHTGATPYQDIALLD---TK-PFGKALVIDGKLQSAETDEFIYHECLVHPPLL--HHPN-PK----------------------S-----IFIMGGGEGSTARELLRHRT-----VEKVVMCDIDEEVVEFCKSYLIV----NSE------A-FC--D---PRLELIIND------------------ARAELEHR-----------EEQYDVIIGDLAD-P--I-EGG-----P-CYKLYT--KSFYELIVKPRLS-KEGIFVTQAGPAGIFSHTEVFSCIYN--TLRQV-F---------------K-YVVPYS-AHVPSYA--------------DIWG--WIM----ASD----------T---P---------------------FE--L-----S--------AD---------EL----D---LRI-------------KQRII-G---E----NRYLDG-KTLSSASTLSKAV-RQ---SMDNETH----VYT----EGTAR-----------FIY---GHGHGSAYKQN*-------------------------------------------------------------------------------------------------------------------
>Ppersica|Prupe.1G255300
--------------------------------------------------------------------------------------------------------------------------------------------------------MAEEIVAGSADFPLKRSREEE---------------------------------ENGVYAA-STVSVE---TDTGKEADGVSA----------------------VIPG-------------------------------------------------------------------------WFSEI---------------------SPMWP------G---EAHSLKIEKILFQGKSDYQDVMVFQ---SS-TYGKVLVLDGVIQLTERDECAYQEMITHLPLC--SIPN-PV----------------------K-----VLVIGGGDGGVLREVARYSS-----IEQIDICEIDKMVVDVSKQFFPA----VAV------G-YE--D---PRVKLHVGD------------------GVAFLKAV----------PAGTYDAVIVDSSD-P--I---G-----P-AQELFE--KPFFQTVANA-LR-PGGVVCTQA--ESIWLHMHIIEDIVA--NCRQI-F---------------K-GSVNYAWTTVPTYP---------S----GVIG--FML----CST---------EG---P----------AVD--------FK--H-----P--------VN---------PI----D---AND-------------SQKSR-----P----LKFYNS-EIHTAAFCLPSFA-KK---VIDAKAN*---------------------------------------------------------------------------------------------------------------------------------------------------------------
>Ppersica|Prupe.1G405900
--------------------------------------------------------------------------------------------------------------------------------------------------------------MGEAVEFFHANGFSN---------------------------------LTQKFDP--KLVLN---VNGNSHLDRDGS---------------------------------------------------------------------------------------------------WYEET-----------------IDD-DLKWS------------FALNVNGVLHKGTSEFQEIALLD---TK-RFGKVLVIDGKMQSAEVDEFIYHECLIHPALL--CHPK-PK----------------------T-----VFIMGGGEGSAAREALKHKL-----LDKVVMCDIDQEVVDFCRRHLTV----NQE------A-FS--H---KKLNLVIND------------------AKAELEKS-----------CEKFDIIVGDLAD-P--V-EGG-----P-CYQLYT--KSFYEQILKPKLN-HGGIFVTQAGPAGIFTHKEVFTSIFN--TIKQV-F---------------K-YVVAYA-AHIPSFA--------------DTWG--WVM----ASD----------E---P---------------------FS--I-----N--------AE---------KM----D---RRI-------------EERID-G---E----LNYLNG-ALFISSATMNKTV-SL---SLLNETH----VYT----EEDAR-----------FIH---GHGVAYRIN*---------------------------------------------------------------------------------------------------------------------
>Ppersica|Prupe.2G312400
----------------------------------------------------------------------------------------------------------------------------------------------------MEGGAGRGLECQKTMDGKASNGNGS---------------------------------EKAIPSCCLKARA----SAPEAEAKCHST----------------------VVSG-------------------------------------------------------------------------WFSES-------QSRSEKASKKVYFNNPMWP------GRQLASHSLKVEKILYKGKSEFQEILVFE---SS-TYGKVLVLDGIIQLSEKDECAYQEMIALLPLC--SIPS-PK----------------------T-----VLVVGGGDGGVLREVSRHPS-----VEHIDICEIDKMVVDVSKKFFPQ----LAV------G-FQ--D---PRVHLHIGD------------------ATEFLRHA----------PKGKYDAVIVDSSD-P--V---G-----P-AQELVE--KPFFETIARA-LR-PGGVLCNMA--ESMWLHTHLIQDMIS--VCRET-F---------------K-GSVNYAWASVPTYP---------S----GVIG--FLL----CST---------EG---P----------PVD--------FK--N-----P--------VN---------SI--------EKL---------------EGALKHKRE----LRFYNS-EMHSAAFALPPFL-RR---EVSALCH-----------SSTSTLPR*--------------------------------------------------------------------------------------------------------------------------------------------
>Ppersica|Prupe.5G176100
----------------------------------------------------------------------------------------------------------------------------------------------------------------------------M---------------------------------EKKTVNY--PLKSA---ADHDEDDDDLVD--------------------HPKVPG-------------------------------------------------------------------------WFSEH---------------------CPIWP------G---QAHFLKVEKILFQGRSEYQSMMVFQ---SS-AYGKVFVLDGALQLTEKDECAYQEMITHLPLC--SIQN-PN----------------------K-----VLLIGGGDGGILREISRHSS-----VQQIDICEIDTMLIDVYKKYFPG----IAI------G-YE--D---PRVTLHVKD------------------GNAFIKSV----------PEGTYDAIIVDAFD-P--I---R-----P-DHELHE--GPFFELVAKA-LR-PGGVMCIQA--ESIWFPSLDVEHLTA--KCRQK-F---------------K-GSVDYAWTIVPAYP---------S----GVIG--FLL----CST---------EG---Q----------FVD--------FR--N-----P--------VN---------PL----D---PNN--------------NSYG-VAKEP----LKFYNP-EVHFAAFCLPSFA-KK---GMNNNKN-------NNGCKVSSN-----------------GVGTISADDEGTKQQVNIQEEDDIIDH*---------------------------------------------------------------------------------------------------
>Ppersica|Prupe.7G202400
-----------------------------------------------------------------------------------------------------------------------------------------------------------MGRQDQAQVKQKWDPHAH--------------------LRKNKKEEDHFSEFELIPEE--DNYQN---PPTGNDQQQHAE---------------------------------------------------------------------------------------------------WFEEQ-----------------LEA-DLKWS--------------FALNGVLHAATSEFQDIVLLD---TK-RFGKALVIDGKLQSAERDEFIYHECLVHPALL--LHDN-PK----------------------T-----IFIMGGGEGSTARESLKHKD-----VEKVIMCDIDRMVVDFCREHLTE----NQE------A-FR--D---DKLHIVFND------------------AKAELEKT-----------EEKFDVIVGDLPD-P--I-EGG-----P-CNDLYT--KPFYEQVIKPHLK-DNGIFVTQAGLAGILSHKDIFTSIYN--TIKHV-F---------------K-YVIAYT-AHVPSYA--------------DSCG--WVL----ASD----------E---P---------------------LK--L-----D--------VE---------QL----N---SRI-------------QERIR-G---D----LLYLDG-ASIVSSTVVNKMI-CT---SLLKETQ----VLT----GENVR-----------FVY---GHG-LTKN-AEE*------------------------------------------------------------------------------------------------------------------
>PQTO_scaffold_2006325_Lycopodium_deuterodensum
-------------------------------------------------------------------------------------------------------------------------------------------------------------MGEVHTNGKTEHSNGS---------------------------------SKTNGVG-GKNGFA---ADAALPSSRRCL---------------------------------------------------------------------------------------------------WFEEE-----------------IEE-NLRWV--------------FSVSKILHTGVSKFQDIALVD---SG-PFGKVLMLDGKLQSAEADEFVYHEALVHPALI--FHSN-PK----------------------I-----VFIMGGGEGSTAREVLKHKS-----IKKVVMCDIDKEVVDFCRAYLTS----NRE------A-FR--S---SRLDLIVND------------------ARAELEEQ-----------KDTYDVIIGDLAD-P--V-EGG-----P-CYKLYT--QSFYEEIIKPRLS-SGGIFVTQAGPAGILSHGEVYSSIHN--TLRQV-F---------------K-FVVPYA-AHVPSYS--------------DTWG--WTL----ASD---------QP--LP---------------------KL--S--------------VE---------ET----D---TRL-------------KQRVT-G---D----LRFLDG-ETLAAIFGLNKTV-RR---TLAKETH----VYT----EETAR-----------YIH---GRGTAQKPLH*--------------------------------------------------------------------------------------------------------------------
>PQTO_scaffold_2082784_Lycopodium_deuterodensum
-------------------------------------------------------------------------------------------------------------------------------------------------------------MGDVHINDKNEHCNGS---------------------------------SKTNGSV-VKNGLA---GDAALHSNKPSL---------------------------------------------------------------------------------------------------WFEEE-----------------IEE-DLRWV--------------FSVSKILHTGVSKFQDIALVD---SG-PFGKVLILDGKLQSAEADEFVYHEALVHPALI--YHSN-PK----------------------N-----VFIMGGGEGSTAREALKHKS-----VLKVVMCDIDKEVVDFCRNYLTF----NRE------A-FC--D---KRLDLVIND------------------ARAELEEE-----------KDKFDVIIGDLAD-P--M-EGG-----P-CYQLYT--QSFYEEIVKQRLN-FGGIFVTQAGPAGILSHGEVYTSIYN--TLRQV-F---------------K-FVVPYA-AHVPSYS--------------DTWG--WIM----ASD----------Q---P---------------------LP--K----LS--------VE---------ET----D---IRL-------------KQRLT-G---D----LRFLDG-ETMAAIFGLNKTV-RR---TLARETH----VYT----EETAR-----------YVH---GRGSAMKLPH*--------------------------------------------------------------------------------------------------------------------
>PQTO_scaffold_2082933_Lycopodium_deuterodensum
-------------------------------------------------------------------------------------------------------------------------------------------MAEAGAVTVGDVPAKRLRSEEEEVVEAVALQNGN----------------------------ATLESENAAARI-AREETA---PVPGSARANVST----------------------VMPG-------------------------------------------------------------------------WFSEI---------------------SPMWP------G---EAHSLKVEKFLFEGKSDFQDVVVFE---SA-TYGKVLVLDGVIQLTERDECSYQEMITHLPLC--SIPN-PK----------------------K-----VLVVGGGDGGVLREVSRHKS-----IEQIDICEIDKMVVDVSKQYFPD----IAI------G-FE--D---PRVNLHIGD------------------GVAFLQEV----------SAGTYDAIIVDSSD-P--I---G-----P-AQQLFE--RPFFQSMAIA-LR-PGGVVCTQA--ESPWLHMHIIKDIVA--ACRQT-F---------------K-GSVNYAWTSVPTYP---------S----GVIG--FML----CST---------EG---P----------VVN--------FR--Q-----P--------IN---------PI----E---NID--------TTSNSNGEAGVQVRKP----LKYYNS-EMHAAAFSLPQFA-RT---ILEPLLT-----------PAQS*------------------------------------------------------------------------------------------------------------------------------------------------
>QFAE_scaffold_2061684_Sequoiadendron_giganteum
-------------------------------------------------------------------------------------------------------------------------------------------------MADNNTNNGASSVALDLPIKRPRSGEEI---------------------------------DNHSAAP--SSQVT---AMEDGAAESYPS----------------------VISG-------------------------------------------------------------------------WFAEM---------------------SPMWP------G---EAHSLKVENVLFQGKSNFQDVMVFE---SA-TYGKVLVLDGVIQLTERDECAYQEMITHLPLC--SIPN-PK----------------------K-----VLVIGGGDGGVLREVSRHNS-----VEQIDICEIDGMVVNVSKEYFPN----IAV------G-FQ--D---PRVKLCIGD------------------GVAFLRDC----------PEGTYDAVIVDSSD-P--I---G-----P-AEELFK--KPFFESVARA-LR-PGGVVCTQA--ESMWLHMPIIEDIVN--VCRQT-F---------------K-GSVNYAWTTVPTYP---------S----GMIG--FML----CST---------EG---P----------PVD--------FR--H-----P--------IN---------AI----D---KQE-------------CNLKSLG---P----LRFYNS-EMHTAAFCLPAFA-RR---AIGSKVQ-----------PSST*------------------------------------------------------------------------------------------------------------------------------------------------
>QHBI_scaffold_2007086_Falcatifolium_taxoides
---------------------------------------------------------------------------------------------------------------------------MGEVTAASMANGHGLKGNGHIGFNGYSNGNGHALIRHNNPAARSPISNGV---------------------------------GARDVPL-PSANGVSAHHTPQLTNPQRTA----------------------TRFG------------------------------------------------------------------DGRRRCFWYEEE-----------------IED-DLRWC--------------FALNRILHTGVSDYQDIALLD---TR-PFGKALVIDGKLQSTEVDEFIYHESLVHPALV--YHFN-PR----------------------S-----AFIMGGGEGSTAREILRHRS-----IKKVVMCDIDQEVVDFCRKYLVV----NRE------A-FS--N---SRLELVIND------------------ARAELESR-----------EERFDVIIGDLAD-P--V-EGG-----P-CYQLYT--KCFYGLVIKPRLN-PQGIFVTQAGPAGVLTHTQVFSSIYN--TLRQV-F---------------K-YVVAYS-AHVPSFA--------------DTWG--WVM----ASD----------H---P---------------------LT--L-----K--------AQ---------EI----D---NRI-------------KDRVK-G---E----LQFLDG-QTFVVATTLNKSV-RK---SLAAETH----IYT----QETAR-----------FIH---GHGKASQL*----------------------------------------------------------------------------------------------------------------------
>QHBI_scaffold_2058447_Falcatifolium_taxoides
----------------------------------------------------------------------------------------------------------------------------------------------MADSSDNLNNGMAASSSLDLPIKRSRTNGGG---------------------------------TSEELKV-GHSSVM---EDGTMANGSYPS----------------------VIPG-------------------------------------------------------------------------WFSEM---------------------SPMWP------G---EAHSLKVEKVLFRGKSDYQDVMVFE---SS-TYGKVLVLDGVIQLTERDECAYQEMITHLPLC--SVQN-PK----------------------K-----VLVIGGGDGGVLREVSRHNS-----VEQIDICEIDQMVVDVAKEYFPK----LAI------G-FE--D---PRVKLYVGD------------------GVAFLNGC----------REGTYDAVIVDSSD-P--I---G-----P-AEELFK--KPFFESVARA-LR-PGGVVCTQA--ESIWLHMHIIEDIVE--VCRQT-F---------------K-GSVNYAWTTVPTYP---------S----GVIG--FML----CST---------EG---P----------AVD--------FQ--H-----P--------IN---------PI----D---KKE-------------SNVKSLG---P----LKFYNS-EIHTASFCLPAFA-RR---AIGSKVQ-----------TIPS*------------------------------------------------------------------------------------------------------------------------------------------------
>QKQO_scaffold_2008735_Pseudotaxiphyllum_elegans_73
--------------------------------------------------------------------------------------------------------------------------------------------------------MVKGESNGVHVANGTLHQSST---------------------------------AAAKSTL-TSTSPH---STVVEPRKRCL----------------------------------------------------------------------------------------------------WFEEE-----------------LEE-DLRWV--------------FGVTKILHTGVSEFQDIELVE---SG-PFGKVLILDGKLQSAEADEFVYHESIVHPALL--YHSN-PK----------------------N-----VFIMGGGEGSTAREALRHRS-----VEEVVMCDIDEEVVNFCRKHLTV----NAE------A-FR--S---DRLELVINC------------------ARAELEKR-----------TEQFDIIIGDLAD-P--V-AGG-----P-CYQLYT--KSFYERILKPRLK-EGGILVTQGGPAGILSHTEVYSSIYN--TLRET-F---------------K-YVVPYA-AHVPSYA--------------DTWG--WVM----ACD---------LP-IPP---------------------MS--------P---------E---------ET----D---SRI-------------NQRID-G---E----LKFLDG-QTLSASIALNKYV-RK---SLAAERH----VYT----EETAR-----------FIH---GHGTALKN*----------------------------------------------------------------------------------------------------------------------
>QKQO_scaffold_2009433_Pseudotaxiphyllum_elegans_75
---------------------------------------------------------------------------------------------------------------------------------------------------------------MVESNGAYVNGTSR--------------------------------------------------PSPVASTKAAVA----------------------AEPE-------------------------------------------------------------------LKKRCLWFEEE-----------------LEE-DLRWV--------------FGVSKILHTGVSKFQDIELVE---SG-PFGKVLILDGKLQSAEADEFVYHESIVHPALL--YHPN-PK----------------------N-----VFIMGGGEGSTAREALRHRS-----VEKVVMCDIDEEVVNFCRKYLTV----NAE------A-FC--S---ERLDLVINC------------------ARAELENK-----------AEQFDIIIGDLAD-P--V-AGG-----P-CYQLYT--KSFYECILKPRLK-EGGILVTQGGPAGILSHTEVYSSIYN--TLRET-F---------------K-YVVPYA-AHVPSYA--------------DTWG--WIM----ASD----------L---P------------I-----PTMRA--E-----E--------TD--------RRV----K---QRI-----D-------------G---E----LKFLDG-QTLSATMALNKHV-RQ---SLAKERH----VYT----EETAR-----------FIH---GHG-TAVK-N*--------------------------------------------------------------------------------------------------------------------
>QKQO_scaffold_2047499_Pseudotaxiphyllum_elegans
--------------------------------------------------------------------------------------------------------------------------------------------------------MAMAEGESRNAAELIAQDNAA--------------------------------------------------PAPSTARANLSN----------------------IMPG-------------------------------------------------------------------------WFSEI---------------------SPMWP------G---EAHSLKVEKFLFEGKSDYQDVVVFE---SA-TYGRVLVLDGVIQLTQRDECAYQEMITHLPLC--SIPN-PK----------------------K-----VLVVGGGDGGVLREVSRHTS-----IEQIDICEIDKMVVDVAKEFFPD----VAI------G-FN--D---PRVNLRIGD------------------GVAFLREV----------PEGTYDAIIVDSSD-P--V---G-----P-AQALFE--RPFYKSLDRA-LR-PGGVICTQA--ESLWLHMPIIKDIVA--ACGHT-F---------------K-GSINYAWTSVPTYP---------S----GVIG--FML----CSS---------AG---P----------FVN--------FR--E-----P--------CN---------PI----D---KAV-------------DTKPSSR--RP----LKFYNS-AMHAAAFSLPQFA-KE---ELEHLLT----------PPPSS*------------------------------------------------------------------------------------------------------------------------------------------------
>QMWB_scaffold_2012530_Anomodon_attenuatus_74
--------------------------------------------------------------------------------------------------------------------------------------------------------MVKGESNGVHVGNGNLHQSSS---------------------------------AAAKPIL-TVTRTPSLPPSTVVEPRKRCL---------------------------------------------------------------------------------------------------WFEEE-----------------LEQ-DLRWV--------------FGVSKILHTGVSEFQTIELVE---SG-PFGKVLILDGKLQSAEADEFVYHESIVHPALL--YHSN-PK----------------------N-----VFIMGGGEGSTAREALRHRS-----VEEVVMCDIDEEVVNFCRKHLTV----NAE------A-FR--S---DRLELVINC------------------ARAELEKR-----------TEQFDIIIGDLAD-P--V-AGG-----P-CYQLYT--KSFYENILKPRLK-EGGILVTQGGPAGILSHAEVYTSIYN--TLRET-F---------------K-YVVPYA-AHVPSYA--------------DTWG--WVM----ASD---------VP-LPP---------------------IR--------P---------E---------ET----D---SRI-------------NQRID-G---E----LKFLDG-QTLSACIALNKHV-RK---SLAAERH----VYT----EETAR-----------FIH---GHGTALKN*----------------------------------------------------------------------------------------------------------------------
>QNGJ_scaffold_2009155_Cupressus_dupreziana
-------------------------------------------------------------------------------------------------------------------------------------------------MADNNTNNGASSVALDLPIKRPRSQEEI---------------------------------DNHSAVP--SSQET---AMEDGAAESYPS----------------------VIPG-------------------------------------------------------------------------WFAEM---------------------SPMWP------G---EAHSLKVDKVLFHEKSDFQDVMVFE---SA-TYGKVLVLDGVIQLTERDECAYQEMITHLPLC--SIPN-PK----------------------K-----VLVIGGGDGGVLREVSRHNS-----VEQIDICEIDGMVVNVSKEFFPN----IAV------G-FQ--D---PRVKLCIGD------------------GVAFLREC----------SEGTYDAVIVDSSD-P--I---G-----P-AEELFK--KPFFESVARA-LR-PGGVVCTQA--ESMWLHMPIIEDIVN--VCRQT-F---------------K-GSVNYAWTTVPTYP---------S----GMIG--FML----CST---------EG---P----------PVD--------FQ--H-----P--------IN---------AI----D---KQE-------------CNLKSLG---P----LRFYNS-EMHTASFCLPAFA-RR---AIGSKVQ-----------PSSS*------------------------------------------------------------------------------------------------------------------------------------------------
>QNGJ_scaffold_2072062_Cupressus_dupreziana
-----------------------------------------------------------------------------------------------------------------------------------MGEAVATNGSFSIKGNGNGHCNGYSNGHGHCNGYSKGSSNGF---------------------------------SNGIPHL-PYSNGNTVHHSNGHAHHVSPS----------------------FGDG--------------------------------------------------------------------RRRCFWYEEE-----------------IED-DLRWC--------------FALNRILHTGVSEYQDIALID---TR-PFGKALVIDGKMQSTEVDEFIYQESLVHPALV--YHSQ-PK----------------------S-----AFIMGGGEGSTAREILRHNC-----VKKVVMCDIDKEVVDFCKKYLVV----NRE------A-FS--N---SRLELVIND------------------ARTELQSR-----------QERFDVIIGDLAD-P--V-EGG-----P-CYQLYT--KSFYELVIKAKLN-PQGIFVTQAGPAGVLTHTQVFSSIYN--TLRQV-F---------------K-HVMPYS-AHVPSFA--------------DTWG--WVM----ASD----------H---P---------------------LT--L-----E--------AG---------EI----D---ERI-------------KQRVK-G---E----LQFLDG-QTFLVAATLNKSV-RK---SLSKETH----VYT----EETAR-----------FIH---GHGKASHQ*----------------------------------------------------------------------------------------------------------------------
>QPDY_scaffold_2027820_Coleochaete_irregularis
--------------------------------------------------------------------------------------------------------------------------------------------------------------------------------------------------------------------------------MTETSKPKRKV---------------------------------------------------------------------------------------------------WFEEE-----------------LEE-DLRWV--------------FGVTSVLHSGVSEFQDIDLIE---SG-PFGKVLVLDGKVQSAEADEFAYHESMVHPSCL--FHES-PK----------------------S-----VFIMGGGEGSTAREALKHKS-----VKKVVMCDIDKEVVEFCKKHLLD----NSE------A-FA--N---ERLEVVIND------------------ARAELESR-----------SEKFDIIIGDLAD-P--V-EGG-----P-CYKLYT--QSFYENVLKPKLS-PGGILVTQAGPAGILTHKEVYAPIYN--TVRQV-F---------------K-YVIPYA-AHIPSYA--------------DTWG--WIM----ASD----------T---P---------------------FP--E-----I--------IA--------ADV----D---ARI-------------KQRVT-G---E----LRFLDG-STLCAEIALNKYV-RA---GLKSETN----IYT----EETAR-----------FIHGQGVHEKAHAVGASQSPSKDFSDVRNGLVPTVNL*-----------------------------------------------------------------------------------------------
>QPDY_scaffold_2028465_Coleochaete_irregularis
----------------------------------------------------------------------------------------------------------------------------------------------------MADVAGPPAKKPKAEGSAADEENGK---------------------------------PKVIGSR--YAEEG---HVQGTAEVNMGA----------------------LKEG-------------------------------------------------------------------------WFSEI---------------------SPMWP------G---QCFSVKVEKILFKGKSLYQDVMVFQ---SE-SHGKVLVLDGVIQLTERDEMSYQEMITHLPLC--SIQN-PK----------------------K-----VLVVGGGDGGVLREVSRHRC-----LERIDICEIDQMVIDVSKEFFPS----VSV------G-FN--D---PRVNVIVGD------------------AVAYVKEA----------EPGTYDAIIVDSSD-P--I---G-----P-AQQLFE--EPFFRSMAKA-LR-PGGVVCTQA--ESLWLHLSIIKDIAA--ACKKV-F---------------G-GSLNYASTSVPTYP---------S----GNIG--FML----CAT---------SG---P----------PVN--------FR--E-----P--------CN---------SI----P---APD--------------ESAP-LKLPP----LRYYNP-EIHKAAFCLPQFA-RE---ALDTILT*---------------------------------------------------------------------------------------------------------------------------------------------------------------
>QSNJ_scaffold_2067026_Taiwania_cryptomerioides
-------------------------------------------------------------------------------------------------------------------------------------------------MADNNTNNGASSVALDLPIKRPRSQEEI---------------------------------DNHSAVP--SSQET---AMEDGTVESYPS----------------------VIPG-------------------------------------------------------------------------WFAEM---------------------SPMWP------G---EAHSLKVEKVLFRGKSDFQDVMVFE---SA-SYGKVLVLDGVIQLTERDECAYQEMITHLPLC--SIPN-PK----------------------K-----VLVIGGGDGGVLREVSRHNS-----VEQIDICEIDGMVVNVSKDFFPN----IAV------G-FH--D---PRVKLYIGD------------------GVAFLRDC----------PEGTYDAVIVDSSD-P--I---G-----P-AEELFK--KPFFESVARA-LR-PGGVVCTQA--ESMWLHMPIIEDIVN--VCRQT-F---------------K-GSVNYAWTTVPTYP---------S----GMIG--FML----CST---------EG---P----------PVD--------FR--H-----P--------MN---------AI----D---KEE-------------CNLKSLG---P----LRFYNS-EMHTAAFCLPAFA-RR---AIGSKVQ-----------PSSS*------------------------------------------------------------------------------------------------------------------------------------------------
>RAWF_scaffold_2039112_Uronema_belka
-------------------------------------------------------------------------------------------------------------------------------------------------------------------MPDTAASDNK--------------------------------------------------ATPGTAKQGLNL----------------------VADG-------------------------------------------------------------------------WFTEL---------------------GSMWP------G---QGLSLKVNEVLYQGRSDFQDVCVFE---SE-AYGTVLVLDGVIQATDRDEFAYQELMAHLPLC--ALEDPAR----------------------K-----ALVVGGGDGGVLRELARHKS-----LEEIHIAEIDKMVIEVAKKYFPQ----MAV------G-FN--D---PRVKVNVCD------------------GIKYVEES----------EPNTYDVIVVDSSD-P--V---G-----P-AEVLFE--KPFFEAMHRA-LK-PGGVICTQA--ESLWLHIDVIKALVA--MCKEV-F---------------VGGSVSYAYTTIPTYP---------S----GQIG--MLI----CSK-------AKEG-AAP---------------------LD--------P--------RT---------PR--------QTV-------------PVDSTVEGVPP----LKYYNP-NIHSASFVLPKFA-QD---ALGSCLS------------FQQ*------------------------------------------------------------------------------------------------------------------------------------------------
>RAWF_scaffold_2042861_Uronema_belka
-----------------------------------------------------------------------------------------------------------------------------------------------------------------------MAANGA--------------------------------------------------VGNDTCGRRL-----------------------------------------------------------------------------------------------------WLEEE-----------------LDE-NVRIS--------------MIVKNVLYSGNSEFQYVELLD---SV-AYGKVLLLDGKVQSTEVDEYMYHELLVHPPML--HHPN-PK----------------------T-----VFIAGGGEGATVREVLRHKT-----VEKVVMVDIDKVVCDFCKEHLHE----NTA------A-FD--H---PKLELIHDD------------------AYTQLENY-----------PGQFDVIIADLAD-P--L-EGG-----P-CYHLYT--KEFYEGVLLKKLN-PGGIFVTQSGPAGVLTCKEVFSGIHK--TLEST-F---------------P-TVIPYS-VHIPSYN--------------DIWG--WNMAFSDAAT------------------------------------KK--L-----P--------AA---------DL----D---QLA-------------AERIEGK--------LKMFDG-ETFGAVSTMTKPV-RI---ALAEEQE----LYT----KDNPR-----------FIH---GSGMKSLA*----------------------------------------------------------------------------------------------------------------------
>RCBT_scaffold_2019772_Sphagnum_palustre
---------------------------------------------------------------------------------------------------------------------------------------------MAELEVPAKRARNDGLDGDVVDEEELVPASDV---------------------------------TNAASLI--SHEKDGVAPAPSTARANLSS----------------------IMPG-------------------------------------------------------------------------WFSEV---------------------SPMWP------G---EAHSLKVEKFLFEGKSDFQDVVVFE---SA-TYGRVLVLDGVIQLTQRDECAYQEMITHLPLC--SIAN-PK----------------------K-----VLVIGGGDGGVLREVSRHIS-----IEQIDICEIDKMVVDVAKEFFPD----VSI------G-FD--D---PRVNLHIGD------------------GVAFLRDV----------PEGTYDAIVVDSSD-P--V---G-----P-AQALFE--RPFYQAVARA-LR-PGGVVCTQA--ESLWLHMPTIKEIVT--VCRHT-F---------------K-GSVNYAWTSMPTYP---------S----GCIG--FML----CST---------EG---P----------PVD--------FR--H-----P--------IN---------PI----S---QQL------------AGEQEKPSSRLP----LKYYNS-AVHTAAFSLPQFA-MD---NLESMLT-----------PPLS*------------------------------------------------------------------------------------------------------------------------------------------------
>RDOO_scaffold_2014086_Racomitrium_varium
------------------------------------------------------------------------------------------------------------------------------------------------MAMRRTDDEQAAAEGARNAAELIAQDNAA--------------------------------------------------PLPSTARANLSS----------------------IMPG-------------------------------------------------------------------------WFSEV---------------------SPMWP------G---EAHSLKVEKFLFEGKSDYQDVVVFE---SA-TYGRVLVLDGVIQLTQRDECAYQEMITHLPLC--SIPN-PK----------------------Q-----VLVVGGGDGGVLREVSRHKS-----IEQIDICEIDKLVVDVAKEFFPD----VAV------G-FE--D---PRVNLHIGD------------------GVAFLREV----------PEGTYDAIIVDSSD-P--V---G-----P-AQALFE--RPFYKTLDRA-LR-PGGVICTQA--ESLWLHMPIIKDIVA--ACRHT-F---------------K-GSINYAWTSVPTYP---------S----GVIG--FML----CST---------AG---P----------SVN--------FR--E-----P--------CN---------PI----D---EAV-------------DAKPSSR--RP----LKFYNS-AMHAAAFSLPQFA-RE---ELEHLLT----------PPPSS*------------------------------------------------------------------------------------------------------------------------------------------------
>RDOO_scaffold_2018088_Racomitrium_varium_78
-----------------------------------------------------------------------------------------------------------------------------------------------------------MVEYNFEEGSNGVHANGT---------------------------------SKTSSTP----------MTAEVEPKKRCL---------------------------------------------------------------------------------------------------WFEEE-----------------LEE-DLRWV--------------FGVSKILHTGVSEFQDIQLVE---SG-PFGKVLILDGKLQSAEADEYVYHESIIHPALL--YHSN-PK----------------------N-----VFIMGGGEGSTAREALRHRS-----VEEVVMCDIDEEVVNFCRKHLTV----NAE------A-FQ--S---DRLDLVINC------------------ARAELEKR-----------TEQFDIIIGDLAD-P--V-AGG-----P-CYQLYT--KSFYERILKPRLK-DGGILVTQGGPAGILSHTEVYSSIYN--TLRQT-F---------------K-YVVPYA-AHVPSYA--------------DTWG--WVM----ASD---------QP--IP---------------------TM--S--------------AE---------ET----D---SRI-------------KQRVD-G---E----LQFLDG-QTLSATIALNKHV-RK---SLAAERH----VYT----EETAR-----------FIH---GHGTAVKN*----------------------------------------------------------------------------------------------------------------------
>RDOO_scaffold_2119432_Racomitrium_varium_77
-----------------------------------------------------------------------------------------------------------------------------------------------------------------MVECNGVHLNGA------------------------------------------SHPAP---TKPVVEEAECKK------------------------------------------------------------------------------------------------RCLWFEEE-----------------LEE-DLRWV--------------FGVSKILHTGVSEFQDIELVE---SG-PFGKVLILDGKLQSAEADEFVYHESIVHPALL--YHSN-PK----------------------N-----VFIMGGGEGSTAREALSHRS-----VEKVVMCDIDEEVVNFCRMHLTV----NAE------A-FR--S---TRLDLVINC------------------ARAELEKR-----------TEQFDIVIGDLAD-P--V-AGG-----P-CYQLYT--KSFYERILKPRLK-EGGIFVTQGGPAGILTHTEVYSSIFN--TLRQT-F---------------K-YVVPYG-AHVPSYA--------------DTWG--WVM----ASD----------Q-PLP---------------------TI--T--------------VE---------ET----D---SRI-------------KQRID-G---E----LKFLDG-QTLSAIMSLNKHV-RK---SLAEERH----VYT----EETAR-----------FIH---GYGTALKI*----------------------------------------------------------------------------------------------------------------------
>RGKI_scaffold_2063096_Leucobryum_glaucum
------------------------------------------------------------------------------------------------------------------------------------------------MAMGRSDDEQAAAHGRRNAAELIAQDNAA--------------------------------------------------PVPSTARANLSS----------------------IMPG-------------------------------------------------------------------------WFSEI---------------------SPMWP------G---EAHSLKVEKFLFEGKSDYQDVVVFE---SA-TYGRVLVLDGVIQLTQRDECAYQEMITHLPLC--SIPN-PK----------------------K-----VLVVGGGDGGVLREVSRHKS-----IEQIDICEIDKLVVDVAKEFFPD----VAV------G-FD--D---PRVNLHIGD------------------GVAFLREV----------PEGTYDAIIVDSSD-P--V---G-----P-AQALFE--RPFYKSLDRA-LR-PGGVICTQA--ESLWLHMPIIKDIVA--ACRHT-F---------------K-GSINYAWTSVPTYP---------S----GVIG--FML----CST---------AG---P----------SVD--------FR--E-----P--------CN---------PI----E---KAV-------------DDNPSSR--RP----LKFYNS-AMHAAAFSLPQFA-RE---ELEHLLT----------PSPSS*------------------------------------------------------------------------------------------------------------------------------------------------
>RMMV_scaffold_2053846_Callitris_macleayana
---------------------------------------------------------------------------------------------------------------------------------------------------------------MGENGEYANGKSAK---------------------------------CNGVKSN--GTVMA---ARSSGDGRRRSC---------------------------------------------------------------------------------------------------WYEEE-----------------VDD-DLRWC--------------FALNSILHTGVSEYQDIALLD---TK-AFGKILVIDGKLQSAEMDEFIYHESLVHPALF--HHPN-PR----------------------S-----AFIMGGGEGSTAREILKHKT-----INKVVMCDIDEEVVDFCKQYLTA----NRE------A-FS--S---SRLDLVIND------------------ARAELETR-----------AECFDVIIGDLAD-P--I-EGG-----P-CYQLYT--KSFYERVVKPKLC-RGGIFVTQAGPAGVLSHTQVFSCIYN--TLRHV-F---------------K-YVVPYS-THIPSFA--------------DTWG--WVM----ASD----------Y---P---------------------LT--L-----T--------SE---------EI----D---SRI-------------KQRTD-G---D----LRYLDG-QTFIGASILSKSV-RK---ALAKESH----IYT----EESAR-----------YIY---GHG-AAHK-LHN*------------------------------------------------------------------------------------------------------------------
>RMMV_scaffold_2054383_Callitris_macleayana
-----------------------------------------------------------------------------------------------------------------------------------------MGEAVATNGFSVKGNGINGHCNGYSNGHYNGYSNGF---------------------------------SNGVAHL-PYSNGSTVHHTNGHAHLSPSF-------------------------------------------------------------------------------------------GDGRRRCFWYEEE-----------------IED-DLRWC--------------FALNRILHTGVSDYQDIALID---TR-PFGKALVIDGKMQSTEVDEFIYHESLVHPALV--YHSQ-PK----------------------S-----AFIMGGGEGSTAREILRHKC-----VKKVVMCDIDKEVVDFCKKYLVV----NRE------A-FN--N---SRLELVIND------------------ARTELQNR-----------QERFDVIIGDLAD-P--V-EGG-----P-CYQLYT--KSFYELVIKSKLN-PQGIFVTQAGPAGVLTHTQVFSSIYN--TLRQV-F---------------K-YVMPYS-AHIPSFA--------------DTWG--WVM----ASD----------H---P---------------------FG--L-----E--------AE---------EI----D---MRI-------------EQRVK-G---E----LQFLDG-QTFLVAATLNKSV-RM---SLSKETH----VYT----EETAR-----------FIH---GHGKASYQ*----------------------------------------------------------------------------------------------------------------------
>RMMV_scaffold_2056822_Callitris_macleayana
-------------------------------------------------------------------------------------------------------------------------------------------------MADNNINNGASSVGLDLPIKRPRSQEEI---------------------------------DNHSAPP--SLQET---AMEDGASESYPS----------------------VIPG-------------------------------------------------------------------------WFAEM---------------------SPMWP------G---EAHSLKVEKVLFHKKSDFQDVIVFE---SA-TYGKVLVLDGVIQLTERDECAYQEMITHLPLC--SIPN-PK----------------------K-----VLVIGGGDGGVLREVSRHNS-----VERIDICEIDGMVVNVSKEFFPS----IAV------G-FQ--D---PRVKLSIGD------------------GVAFLKDC----------SEGTYDAVIVDSSD-P--I---G-----P-AEELFK--KPFFESVARA-LR-PGGVVCTQA--ESMWLHMPIIEDIVN--VCRQT-F---------------K-GSVNYAWTTVPTYP---------S----GMIG--FML----CST---------EG---P----------PVD--------FR--H-----P--------IN---------VI----D---KQE-------------CNLKCLG---P----LRFYNS-EMHTAAFCLPAFA-RR---AIGSKVQ-----------SSSS*------------------------------------------------------------------------------------------------------------------------------------------------
>RSCE_scaffold_2001898_Wollemia_nobilis
-----------------------------------------------------------------------------------------------------------------------------------------------MAENGSSNNGTSVSAALDLPSKVSRPKEGE------------------------------VNNNFDNFSSMAEAATTTYMDGEATKEESYPS----------------------VIPG-------------------------------------------------------------------------WFAEI---------------------SPMWP------G---EAHSLKCEKVLFRGKSDYQDVMVFQ---SS-TYGKVLVLDGVIQLTERDECAYQEMITHLPLC--SIPN-PK----------------------K-----VLVIGGGDGGVLREVARHDS-----VEQIDICEIDRMVVDISKEYFPS----LAI------G-FE--D---PRVKLHIGD------------------GVAFLKDC----------PEGIYDAIIVDSSD-P--I---G-----P-AEELFK--RPFFESVARA-LR-PGGVVCTQA--ESIWLHMKIIEDIVN--VCRQT-F---------------K-GSVNYAWTTVPTYP---------S----GVIG--FML----CST---------EG---P----------AVD--------FR--H-----P--------IN---------PI----D---KQE-------------SNVVSLG---P----LKFYNS-EIHTAAFCLPAFA-RN---AIGSKVQ-----------PSSIL-----------------GSKDVSAHCDGNK*-----------------------------------------------------------------------------------------------------------------
>RSCE_scaffold_2007857_Wollemia_nobilis
------------------------------------------------------------------------------------------------------------------------------------------MGEIIAATANGFSINGNGNGNGHGLAGCNVYSNGN---------------------------------GHALLRH-VNGAAT---AAPSSNGVGVHQTVSSSNGVGAHRTNGVEAKPTAASFG------------------------------------------------------------------EGRRRCFWYEEE-----------------IED-DLRWC--------------FALNRILHTGVSDYQEIALLD---TR-PFGKALVIDGKLQSTEVDEFIYHESLVHPALV--YHSS-PK----------------------T-----AFIMGGGEGSTAREILRHKS-----MKKVVMCDIDQEVVDFCRKYLVV----NRE------A-FC--N---NRVELIIND------------------ARAELENR-----------EERFDVIIGDLAD-P--V-EGG-----P-CYQLYT--KSFYEFVIKPKLN-HQGIFVTQAGPAGVLTHTQVFSSIYN--TLRQV-F---------------K-YVVAYS-AHVPSFA--------------DTWG--WVM----ASD----------H---P---------------------LK--L-----E--------AE---------EI----D---SRI-------------KQRVK-G---E----LQYLDG-QTFVVAATLNKSV-RK---SLAKETH----VYT----EETAR-----------FIY---GHGKASHP*----------------------------------------------------------------------------------------------------------------------
>RTMU_scaffold_2000344___2000345_Calypogeia_fissa
---------------------------------------------------------------------------------------------------------------------------------------MTEAITTTTTIHLNGSAHGPAKGSVVAVGSKRYHVGDS--------------------VATTTTILPHTNGSAMHING--SSVVM---NGSSVGINGSSV----------------------VANG----------------------------------------------------------KKKDMARNVGSKRCLWFEEE-----------------LEE-DLRWV--------------FGVSKILHTGVSEFQDIELVE---SG-PFGKVLLLDGKLQSAEADEFVYHESIVHPASL--YHAN-PK----------------------N-----VFIMGGGEGSTAREALKHKS-----VRKVVMCDIDKEVVDFCREHLEA----NAE------A-FR--S---RRLELVINC------------------ARAELERR-----------EEQFDIIVGDLAD-P--V-DGG-----P-CFKLYT--QSFYERVLKTKLA-PGGIFVTQGGPAGILSHKEVYSSIYN--TLRQV-F---------------K-YVIPYA-AHVPSYA--------------DTWG--WVM----ASD--------HSF---P------------A--------FS--V-----E-------ETE--------SRI----A---QRI-----------------Q-G---E----LRFLDG-PTMAATFALNKHV-RT---SLYNETH----VYT----EETAR-----------FIH---GHG-TAQK-Q*--------------------------------------------------------------------------------------------------------------------
>RTMU_scaffold_2011468_Calypogeia_fissa
--------------------------------------------------------------------------------------------------------------------------------------------------------------------------------------------------------------------------------------------------------------------------------------------------------------------------------------------------------------------------MWP------G---QAMTLKVKKVIHHEKSKYQDVLVFE---ST-DYGMVLVLDNVIQCTERDEFAYQEMITHLAMF--SHPN-PK----------------------K-----VLVIGGGDGGVLREVIKHEC-----VEEAILCDIDEAVIRLSKKYLPG----MAV------G-FE--N---PKVRTHIGD------------------GFKFLDDY-----------KNEFDVIITDSSD-P--E---G-----P-AESLFQ--KPYFELLFGA-LR-EGGVITTQA--ENQWLHLPLITKLKK--DCREV-F-----------------PTVEYAYTTIPTYP---------S----GQIG--FMV----CCK-------DANR---D---------------------VS--K-----P--------LR-----SVTSAE----E---DKL----------------------------FRYYNA-EIHNASFLLPTFA-RT---ALR*-------------------------------------------------------------------------------------------------------------------------------------------------------------------
>RTMU_scaffold_2179523_Calypogeia_fissa
-------------------------------------------------------------------------------------------------------------------------------------------------------------------------------------------------------------------------------MTEITHSTIKDG---------------------------------------------------------------------------------------------------WFREI---------------------SDQWP------G---QAMILKVNQVLHHEKSKYQDVLVFE---SS-DHGMVLVLDNVIQCTERDEFSYQEMITHLAMN--AHPN-PK----------------------S-----VLVIGGGDGGVLREVVKHET-----VETAILCDIDEAVIRVSKKYLPG----MSI------G-FQ--H---PNVQTHIGD------------------GFQFLADR-----------KNEFDVIITDSSD-P--V---G-----P-AESLFQ--KPYFQLIYDA-LK-DGGVMTTQA--ENQWLHLPLIAQLKK--DCREV-F-----------------PVAEYAQTSIPTYP---------S----GGIG--FMV----CTK----------D---P----------HRD--------VK--E-----P--------LR---------TWSVEEE---EKL----------------------------CRYYNK-EVHKASFVLPTFT-RK---ALR*-------------------------------------------------------------------------------------------------------------------------------------------------------------------
>RTMU_scaffold_2181202_Calypogeia_fissa
---------------------------------------------------------------------------------------------------------------------------------------------------------MMMSSSDSELETVSIPPILH---------------------------------SSMTGKK--TSDDK---SPVTDLYASFCT-K--------------------SLHGVV-----------------------------------------------------------------------LLRGDLADF-----------------TTDHPAFLYDEG---EARSLKIEKQLFEGQSDFQHVQVFQ---SE-SYGKVLVLDGVIQLTERDEFSYQEMITHLPLC--SVPN-PK----------------------K-----VLVIGGGDGGVLREVSRHVS-----VEQVDICEIDKMVVDVSKEFFPN----VAI------G-FE--D---PRVNVHIGD------------------GVKFLEEA----------EEKTYDCIIVDSSD-P--I---G-----P-AEGLFQ--KPFYQSLARA-LR-PGGVACTQA--ESIWLHLPIIKEVVA--INSTI-F---------------K-GSINYAWTSVPTYP---------S----GVIG--FML----CST---------EG---P--------A---V-D------FS--K-----P--------IN---------PI----E---SFA-YTEES-------LKLVK-G---P----LKYYNS-QVHSAALTLPQFA-RE---SFGDLLT----SYK*--------------------------------------------------------------------------------------------------------------------------------------------------------
>RXRQ_scaffold_2022708_Phaeoceros_carolinianus_68
----------------------------------------------------------------------------------------------------------------------------------------------MGEATDLEVVAHQNGAQARANGSALPNGNGS--------------------------------LPNGGSGLQNGSAGTGQNGSLDPRKAAPPRR--------------------------------------------------------------------------------------------------WFEEE-----------------LEE-DLVWK--------------FGVSKELHSGVSQFQSIELVE---SG-PFGKVLLLDGKLQSSEADEFVYHECIVHPAVL--YHKN-PR----------------------S-----IFIMGGGEGSTAREALRHRS-----VKKVVMCDIDKEVVDFCRAHLTA----NAE------A-FR--S---SRLELVINC------------------ARAELESR-----------NEVFDVIVGDLAD-P--V-DGG-----P-CYQLYT--QSFYNDVLKPRLS-AGGIFVTQAGPAGILSHKEVYTSIFN--TLRQV-F---------------K-YVVPYA-AHVPSYA--------------DTWG--WIM----ASD----------H---P---------------------FL--S----IS--------VE---------ET----D---KRI-------------QHRIDFD--------LRFLDG-LTLSATMALNKEV-RK---ALEEETH----VYT----EKTAR-----------FLH---GHGVISSI*----------------------------------------------------------------------------------------------------------------------
>RXRQ_scaffold_2133223_Phaeoceros_carolinianus
-------------------------------------------------------------------------------------------------------------------------------------------------------------------------------------------------------------------------------------------------------------------------------------------------------------------------------------------------------------------------------------------------------------------------------------------------------------------------------------------------------------------------------MVVDVSKEFFPK----MAV------G-YE--D---PRVTLHIGD------------------GVAFLKNA----------PEGTYDAIIVDSSD-P--I---G-----P-AQELFE--KPFFESVARA-LR-PGGVVCTQA--ESIWLHMHIIEDIVA--NCRQV-F---------------K-GSVNYAWTTVPTYP---------S----GVIG--FMV----CST---------EG---P----------AVD--------FR--N-----P--------VF---------NI----E---EDE-------------SSKSQ-G---P----LKFYNS-EIHSAAFCLPSFA-KR---VIESKAT--------------N*------------------------------------------------------------------------------------------------------------------------------------------------
>RXRQ_scaffold_2136777_Phaeoceros_carolinianus
------------------------------------------------------------------------------------------------------------------------------------------------------------------MAATEAAENGG---------------------------------ATNAAALIAQDAAA---PAPSTARANLST----------------------IMPD-------------------------------------------------------------------------WFSEV---------------------SAMWP------G---EAHSLKVEKFLFEGKSDFQDVVVFE---SA-TYGRVLVLDGVIQLTQRDECAYQEMIAHLPLA--SIPS-PK----------------------K-----VLVVGGGDGGVLREVSRHSS-----IEQIDLCEIDKMVVDVAKEFFPD----VAI------G-FN--D---PRVNVHIGD------------------GVAFLRDT----------PAGTYDCIIVDSSD-P--V---G-----P-AQQLFE--RPFYESLARA-LR-PGGVVCTQA--ESVWLHMHIIENIVS--TCRNI-F-----------------KTVNYAWTSVPTYP---------S----GVIG--FLL----CAT---------EG---P----------AVN--------FR--K-----P--------VN----------V----D---WEQ-------------DVGVKGVTRAP----LKYYNS-EMHASAFNLPEFA-RR---KLQPLLS------------SSQ*------------------------------------------------------------------------------------------------------------------------------------------------
>RXRQ_scaffold_2137751_Phaeoceros_carolinianus
-------------------------------------------------------------------------------------------------------------------------------------------------MAVAVENGEVQPEQQECEQIEQQQVEEK---------------------------------NAESEIG--GRFGD---SKPSTARANLST----------------------IMPG-------------------------------------------------------------------------WFSEV---------------------SAMWP------G---EAHSFKVDKFLYEGTSEYQDVVVFE---SA-TYGRVLVLDGVIQLTQRDECAYQEMIAHLPLT--SIPN-PK----------------------K-----VLVVGGGDGGVLREVSRHAS-----IEQIDLCEIDKMVVEVAKAYFPE----VAV------G-FN--D---PRVNVHIGD------------------GVAFLNNT----------PAGTYDCIIVDSSD-P--V---G-----P-AQQLFE--KPFYESLARA-LR-PGGVICTQA--ESLWLHMPIIEDIVA--TCRQI-F-----------------KTVGYAWTSVPSYP---------S----GVIG--FLL----CAT---------EG---P----------EVN--------FR--Q-----P--------VN----FFDEDGI----A---ERD----------TTDKADAKSVVRTP----LKFYNE-EMHSAAFRLPEFA-RR---ILEPLLV-----------PAAST*-----------------------------------------------------------------------------------------------------------------------------------------------
>RXRQ_scaffold_2139185_Phaeoceros_carolinianus_65
--------------------------------------------------------------------------------------------------------------------------------------------------------MGEATDLEVVAHQNGAKPRAN---------------------------------GSAVAIS--NGSLA---NGGSATNGSANGAL--------------------DVPR------------------------------------------------------------------KTAEVRRWFEEE-----------------LED-DLVWK--------------FGISKVLHTGVSKFQSIELVE---SG-PFGKVLILDGKLQSSEVDEFVYHESLVHPALL--YHKN-PK----------------------N-----VFIMGGGEGSTAREALRHKS-----VKQVVMCDIDEEVVDFCRDHLSA----NAE------A-FR--S---TRLELVINC------------------ARAELEKR-----------EEKYDVIVGDLAD-P--V-DKG-----P-CYKLYT--QSFYEQCLKPRLN-AEGIFVTQAGPAGIYTHRQVYSSIYN--TLRQV-F---------------K-YVAPYT-AHVPSYA--------------DTWG--WIM----ASD----------H---P------------L--------PA--V-----T--------VE---------ET----E---KRI-------------QHRIG-S---E----LRFLDG-LTLSAIMSLNKEV-RR---GLLEETH----VYT----EKTAR-----------FIH---GHG-VNS*-----------------------------------------------------------------------------------------------------------------------
>RYJX_scaffold_2063306_Pandorina_morum
-------------------------------------------------------------------------------------------------------------------------------------------------------------------------------------------------------------------------------MSAYAKRL-------------------------------------------------------------------------------------------------------WLEEE-----------------LGD-DYRWS--------------YRVSAVLFSGRSPYQEVDLVE---TP-TWGKVLLLDGKMQSTEADEEVYHELLVHPPLL--HHPN-PK----------------------R-----VFIMGGGEGATAREVLRHRS-----VEEVVMVDIDKVVTDFCAQHLER----NSA------A-FR--D---PRLRLINDD------------------ARLQLEAA----------TDASFDVIISDLAD-P--L-EGG-----P-CYQLYT--QEFYKNVVLRKLV-PGGIFITQSGPAGFLSCREVFTAIHA--TLRSV-F---------------P-TVVAYS-QHIPSFC--------------DAWG--YNM----AFT----------D---P---------------------KQ--V-----P--------LD---------TV--VLD---ARI-------------EDRILRL---P----LSFLDG-ETFTGLRQLNKVV-RK---ALSEDIE----VYT----TGTAR-----------FIH---GTGVKASVLTTA*------------------------------------------------------------------------------------------------------------------
>Sacu_v1.1_s0021.g008301
------------------------------------------------------------------------------------MAANAACLPPPYPFSATAPPPSASSITPSPPHNGSNSNSSSSTHSKSTAHYAKIAADPSCHNNGCSYNNGSAVAHCIKTAADPSSNYLG--------------------GGTHSTKTTPAETTAEYPSC--INDAV---SAKGTANHSCNDNSGSAHYDYVSRNGNGPKVALPIVGN----------------HHFLHGSTSLHYSFPNYGRPNVDAAAAPPSSPRGCQIEPQCESGSSVVESGPRRPCLWYEEE-----------------IDE-SLRWC--------------FGLTSILHAGVSKYQEIALLD---TL-VFGKVLTLDRKMQSAEKDEWVYHECLVHPALL--CHSS-PK----------------------S-----VFIMGGGEGSTAREALRHKS-----VKKVVMCDIDEEVVKFCSTHLTT----NKE------A-FH--N---PNLELVIND---------------------------------------------------A--------------------------------------------------------------------------------------K-----------------------------------YT*-------------------------------------------------------------------------------------------------------------------------------------------------------------------------------------------------------------------------------------------------------------------------------------------------------------------
>Sacu_v1.1_s0054.g014271
------------------------------------------------MAETACIAPYPPEPIARDPAPYNPLHIQSTLGGASTGHGAPTHSSIANYSINGHSSTLQLQTSLELNPRCTGLPLIPSRTAYSSSFIPDSQNQYSNTMSCPFIDGRGSNVTDDNSVLTVVNDPNY--------------------MVCCTCAKQHLHDPAADWMP--SRSTT---NGPSPLISSTTNCPSHGHQSDVHMINPARSIVATHAHG-----AFSSNTINGTISPRINNTEDLYRINKKDIDINPSNHAISDAIKAPVHDEHSSTTPGSDMPPPARRPSLWYEEE-----------------IDE-NLRWC--------------FCLKSILHTGVSKFQEIALLD---TQ-PFGKVLTLDGKMQSAEVDEWVYHECLVHPALL--LHQS-PE----------------------N-----IFIMGGGEGSTTREVLRHNS-----IKKVVILELE------CR--------------------------------------------------------------------------IEKFDIIVGDLAD-P--L-EWG-----P-CYQLYS--KGFYENVVKPKLN-DDGIFVTQAGPAGVLSHKEVFTSIYN--TLKQV-F---------------P-YVIAYS-AHVPSYA--------------DTWG--WVM----ASN----------Q---P----------------LNEISHH--D-----E--------MD--------TRI----R---KRI-----------------K-G---E----LQYLDG-ATLHASTILNKTV-RQ---SLASENH----IYT----EDSAR-----------FLY---GHG-RTKH-LSTH------------------------------------------------------------------------------------------------------------------
>Sacu_v1.1_s0213g025989
-----------------------------------------------------------------------------------------------------------------------------------------------MAASDSSVHTRKPPGDGHPFSCTMPSDFCC---------------------------------PQHVDPS--HLFAL---AKPGTGRANLSH----------------------GTPG-------------------------------------------------------------------------WYSEI---------------------NPLWH------G---EAHSLKVKEVLFEGKSDYQDVLVFQ---SE-AYGKVLVLDGVIQLTERDECAYQEMITHLPLC--SIPN-PK----------------------K-----VLVIGGGDGGVLREVSRHRS-----VEQIDICEIDTMVIEVSKIFFPD----LAI------G-YD--D---PRVKLFVGD------------------GFAFLKEA----------SEGFYDAVIVDSSD-P--I---G-----P-AQQLFE--KPFFELVARA-LR-PGGVFCTQT--ESLWLHMHTIRDIIS--LASQS-F---------------R-GSVRYAWTSVPTYP------------------------------------------------------------------------------------------------RL----T---VKL----------------------------SDYLSG-DVQSP---LQMFG-HA--------------------------------------------------------------------------------------------------------------------------------------------------------------------------
>SCEB_scaffold_2005454_Podocarpus_coriaceus
---------------------------------------------------------------------------------------------------------------------------MGEVTAASMANGLAINGNGHIGCHGYSNGNGHAVVRHTNSAAKSSISNGV---------------------------------DAHDVPL-PSSNGVSVHHISAVSNPQKTA----------------------TCFG------------------------------------------------------------------NGRRRCFWYEEE-----------------IED-DLRWC--------------FALNRILHTGVSDYQDIALLD---TR-PFGKALVIDGKLQSTEVDEFIYHESLVHPALV--YHSN-PR----------------------S-----AFIMGGGEGSTAREILRHKS-----IKKVVMCDIDQEVVEFCRKYLVV----NRE------A-FS--N---SRLELVIND------------------ARAELESR-----------EERFDVIIGDLAD-P--V-EGG-----P-CYQLYT--KCFYELVIKPRLN-PQGIFVTQAGPAGVLTHTQVFSSIYN--TLRQV-F---------------K-YVVAYS-AHIPSFA--------------DTWG--WVM----ASD----------H---P---------------------LT--L-----E--------PQ---------EI----D---TRI-------------KHRVK-G---E----LQFLDG-QTFVVAATLNKSV-RK---SLAAETH----VYT----EETAR-----------FIH---GHGKASQL*----------------------------------------------------------------------------------------------------------------------
>SCEB_scaffold_2009838_Podocarpus_coriaceus
----------------------------------------------------------------------------------------------------------------------------------------------MADSSDNLNNGMSASSSLDLPIKRHRSNGVD---------------------------------TSEESKV-GHSSVM---EDRPMANGSYPS----------------------VIPG-------------------------------------------------------------------------WFAEM---------------------SPMWP------G---EAHSLKVEKVLFRGKSDYQDVMVFE---SS-TYGKVLVLDGVIQLTERDECAYQEMITHLPLC--SVQN-PK----------------------K-----VLVIGGGDGGVLREVSRHNS-----VEQIDICEIDQMVVDVAKEYFPK----LAI------G-FE--D---PRVKLYIGD------------------GVAFLNGF----------PEGTYDAVIVDSSD-P--I---G-----P-AEELFK--KPFFESVARA-LR-PGGVVCTQA--ESIWLHMHIIEDIVE--VCRQT-F---------------K-GSVNYAWTTVPTYP---------S----GVIG--FML----CST---------EG---P----------AVD--------FQ--H-----P--------IN---------PI----D---KKE-------------SNVKSLG---P----LKFYNS-EIHTASFCLPAFA-RR---AIGSKVQ-----------TISS*------------------------------------------------------------------------------------------------------------------------------------------------
>SCEB_scaffold_2010551_Podocarpus_coriaceus
------------------------------------------------------------------------------------------------------------------------------------------------------MADNKKEMSNGVVLDLPIKRTRP---------------------------------VEEIIQQ-STMAKL---DGGAALDESYPS----------------------VIPG-------------------------------------------------------------------------WFAEM---------------------SPMWP------G---EAHSLKCEKVLFRGKSDYQDVMVFQ---SS-TYGKVLVLDGVIQLTERDECAYQEMITHLPLC--SVPS-PK----------------------K-----VLVIGGGDGGVIREVSRHNS-----VEQIDICEIDQMVVDVARDLFPN----LAI------G-FA--D---PRVKLHIGD------------------GVAFLKEC----------AEGTYDVVIVDSSD-P--I---G-----P-AEELFK--RPFFESVAKA-LR-PGGVVCTQA--ESIWLHMHIIEDIVN--VCRQT-F---------------K-GTINYAWTSVPTYP---------S----GVIG--FML----CST---------EG---P----------EVD--------FQ--H-----P--------IN---------PI----D-------------------KQKSNVKSLCP----LKFYNA-EMHKAAFCLPAFA-RR---TIGPKVQ-----------PSSS*------------------------------------------------------------------------------------------------------------------------------------------------
>SCEB_scaffold_2053247_Podocarpus_coriaceus
-------------------------------------------------------------------------------------------------------------------------------------------------------MAEDFNAKMLRPEEEDRGNENN---------------------------------SVEQIQL-CCEKAK---GGDLLEGGCIST----------------------VIPG-------------------------------------------------------------------------WFSEV----KNSFNMPEASPKVQYFNNPMWP------G---EAHSIKVEKILFQGRSEYQDVMVFQ---SL-AYGKVLVLDGVVQLSEKDECAYQEMIAHLPLC--SIPS-PK----------------------K-----VLVVGGGDGGVLREISRHNS-----VVQIDICEIDKMVIDVSKQFFPE----LGV------G-YE--D---PRVRLHVGD------------------GAAFLREC----------PSGQYDAIIVDSSD-P--V---G-----P-AQELFE--KPFYETVARA-LR-PGGVVITQA--ESLWLHMHVIEDIII--ACRQA-F---------------K-GSVNYAWTSVPTYP---------S----GAIG--FMI----CST---------EG---P----------SVD--------FK--N-----P--------IN---------PI----E---KQE-------------TAKKLRG---P----LKFYNS-EIHAAAFALPAFV-RK---ALDSLLR------------PSS*------------------------------------------------------------------------------------------------------------------------------------------------
>Selaginella_moellendorffii_-_182311_thermospermine_synthase
--------------------------------------------------------------------------------------------------------------------------------------------------------MGEAHVICEDPPKEENYDGGY-----------------------------------------------------NSRSRKNSL---------------------------------------------------------------------------------------------------WYEEE-----------------IDE-GLKWT--------------YSVSRVLHTGASQFQDIALLE---TQ-PFGKVLLLDGKMQSAEADEFVYHEALVHPALL--SHPN-PQ----------------------T-----VFIMGGGEGSTAREVLKHKT-----IAKVVMCDIDKEVVDFCQMHLSV----NRD------T-FQ--S---KKLDVIIRD------------------ARLELEDC-----------VEKFDIVIGDLAD-P--M-EGG-----P-CNQLYT--KAFYQNIVKSKLK-NGGIFVTQAGPAGILSNLDVFPSIYH--TLKQV-F---------------R-YVIPYT-THIPSYS--------------DVWG--WVM----ASN---------TD-------------------------YIYQN--------------AS---------DI----D---SII-------------KSRINAS--------LKFMDG-ETYSGILKLNKQQ-RQ--------M*----------------------------------------------------------------------------------------------------------------------------------------------------------------
>Selaginella_moellendorffii_-_74817_thermospermine_synthase_ACL5
--------------------------------------------------------------------------------------------------------------------------------------------------------MGEVHVNGTAKLNSKANSNGI---------------------------------------------------AALGSNNHRGL---------------------------------------------------------------------------------------------------WFEEE-----------------IED-DLRWV-------------------VLHTGISEFQDIALVE---SG-PFGKVLILDGKLQSAEADEFVYHECLVHPALL--YHPN-PR----------------------N-----VFIMGGGEGSTAREALRHKS-----VKKVVMCDIDKEVVEFCRAHLTM----NHE------A-FH--S---SRLDLVIND------------------ARAELEER-----------QDKFDIIIGDLAD-P--V-EGG-----P-CYKLYT--QSFYERVVKPRLN-AGGILVTQGGPAGILTHSEVYSSIFN--TLRQV-F---------------K-YVVPYA-AHIPSYS--------------DSWG--WIM----ASD----------H---P---------------------FAQVS--------------VQ---------ET----D---LRI-------------KQRFDSE--------LRFLDG-ETLSATLALNKHV-RQ---TLAGETH----VYT----EESAR-----------FVH---GHGAAQSAQS*--------------------------------------------------------------------------------------------------------------------
>SKQD_scaffold_2077345_Takakia_lepidozioides
[truncated: 190,202 more chars]
